# Supplementary material for: Light-mediated cascade transformation of activated alkenes: BiOBr nanosheets as efficient photocatalysts for the synthesis of α-aryl-β-trifluoromethyl amides
Source: Royal Society of Chemistry journal article supplement (doi:10.1039/c5ra08996d), 2015-01-01

# Electronic Supplementary Information

## Light-Mediated Cascade Transformation of Activated Alkenes: BiOBr Nanosheets as Efficient Photocatalysts for the synthesis of $\alpha$ -aryl- $\beta$ -trifluoromethyl amides

Cuibo Liu, Bin Zhang\*

*Department of Chemistry, School of Science, Tianjin University, and Collaborative Innovation Center of Chemical Science and Engineering (Tianjin), Tianjin 300072, P. R. China.*

Fax&Tel: +86-22-27403475; E-mail: bzhang@tju.edu.cn (B. Z.)

### Table of Contents

|                                                                                                                                                                                           |      |
|-------------------------------------------------------------------------------------------------------------------------------------------------------------------------------------------|------|
| 1. General information and materials .....                                                                                                                                                | 2    |
| 2. Optimization of the Reaction Conditions .....                                                                                                                                          | 3    |
| 3. Synthesis and characterizations of BiOBr nanosheets .....                                                                                                                              | 4    |
| 4. Typical procedures for the synthesis of substrates .....                                                                                                                               | 5    |
| 5. General procedure for light-induced BiOBr nanosheets promoted one-pot tandem trifluoromethylation/1,4-aryl migration/desulfonylation and N-H bond formation of activated Alkenes ..... | 5    |
| 6. Control experiment .....                                                                                                                                                               | 6    |
| 7. Copies of NMR Spectra.....                                                                                                                                                             | 7-51 |

## **1. General Information:**

### **Materials**

All purchased reagents were used without further purification. Analytical thin layer chromatography was performed on 0.20 mm Qingdao Haiyang silica gel plates. Silica gel (200-300 mesh) (from Qingdao Haiyang Chem. Company, Ltd.) was used for flash chromatography.

### **Characterization**

The scanning electron microscopy (SEM) images were taken with a Hitachi S-4800 scanning electron microscope (SEM, 5 kV) equipped with the Thermo Scientific energy-dispersion X-ray fluorescence analyzer. Transmission electron microscopy (TEM) and higher-magnification transmission electron microscopy (HRTEM) were carried out with JEOL JEM-2100F system equipped with the EDAX Genesis XM2. The X-ray diffraction patterns (XRD) of the products were recorded with a PANalytical X'Pert PRO X-ray diffractometer with Co K $\alpha$  radiation ( $\lambda = 1.78897$  nm) at 40 kV and 40 mA. Then the data was converted into corresponding Cu K $\alpha$  radiation. The optical properties of the samples were analyzed by a Shimadzu UV-2550 ultraviolet/visible diffuse reflectance spectroscopy (DRS), during which BaSO<sub>4</sub> was employed as the internal reflectance standard. <sup>1</sup>H, <sup>13</sup>C, <sup>19</sup>F NMR were recorded on Varian Mercury Plus 400 instruments at 400 MHz (<sup>1</sup>H NMR), 100 MHz (<sup>13</sup>C NMR), as well as 376 MHz (<sup>19</sup>F NMR). Chemical shifts were reported in ppm down field from internal Me<sub>4</sub>Si and external CCl<sub>3</sub>F, respectively. Multiplicity was indicated as follows: s (singlet), d (doublet), t (triplet), q (quartet), m (multiplet), dd (doublet of doublet), br (broad). Coupling constants were reported in Hertz (Hz). HRMS were recorded on an Agilent Q-TOF spectrometer using the ESI method. IR spectra were recorded on an AVATAR 360 FT-IR spectrometer.

## 2. Table S1. Optimization of the Reaction Conditions<sup>a</sup>

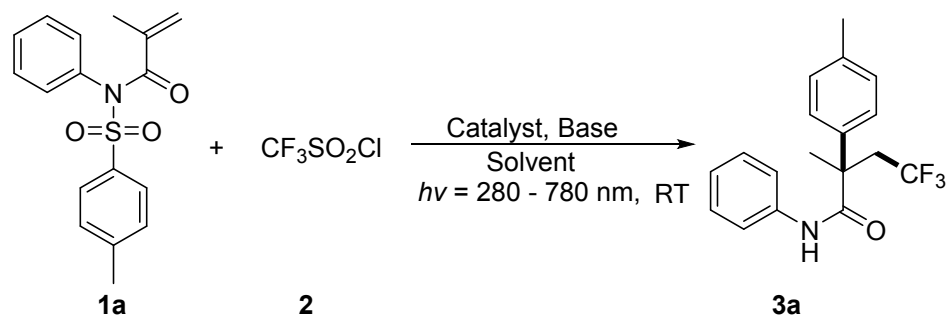

| Entry           | Catalyst                                                | Base                            | Solvent                         | Yield (%) |
|-----------------|---------------------------------------------------------|---------------------------------|---------------------------------|-----------|
| 1 <sup>b</sup>  | BiOBr nanosheets                                        | K <sub>2</sub> HPO <sub>4</sub> | DMF                             | 74        |
| 2 <sup>b</sup>  | BiOBr nanosheets                                        | K <sub>2</sub> HPO <sub>4</sub> | DMAC                            | 79        |
| 3               | BiOBr nanosheets                                        | K <sub>2</sub> HPO <sub>4</sub> | DMAC                            | 75        |
| 4               | BiOBr nanosheets                                        | K <sub>2</sub> HPO <sub>4</sub> | DMSO                            | -         |
| 5               | BiOBr nanosheets                                        | K <sub>2</sub> HPO <sub>4</sub> | NMP                             | 51        |
| 6               | BiOBr nanosheets                                        | K <sub>2</sub> HPO <sub>4</sub> | H <sub>2</sub> O                | -         |
| 7               | BiOBr nanosheets                                        | K <sub>2</sub> HPO <sub>4</sub> | CH <sub>3</sub> OH              | -         |
| 8               | BiOBr nanosheets                                        | K <sub>2</sub> HPO <sub>4</sub> | CH <sub>2</sub> Cl <sub>2</sub> | -         |
| 9               | BiOBr nanosheets                                        | K <sub>2</sub> HPO <sub>4</sub> | Toluene                         | -         |
| 10              | BiOBr nanosheets                                        | K <sub>2</sub> HPO <sub>4</sub> | THF                             | Trace     |
| 11 <sup>c</sup> | BiOBr nanosheets                                        | K <sub>2</sub> HPO <sub>4</sub> | DMAC                            | -         |
| 12              | -                                                       | K <sub>2</sub> HPO <sub>4</sub> | DMAC                            | -         |
| 13              | CdS                                                     | EtNiPr <sub>2</sub>             | DMAC                            | -         |
| 14              | Ru(bpy) <sub>3</sub> Cl <sub>2</sub> ·6H <sub>2</sub> O | EtNiPr <sub>2</sub>             | DMAC                            | -         |

<sup>a</sup> Reaction conditions: **1a** (0.2 mmol), **2** CF<sub>3</sub>SO<sub>2</sub>Cl (1.0 mmol), base (0.6 mmol), catalysts (20 mg), solvent (1.0 mL), 300 W Xe arclamp, RT. <sup>b</sup> 0.4 mmol HSiEt<sub>3</sub> is added. <sup>c</sup> In the dark.

### 3. Synthesis and characterizations of BiOBr nanosheets

The procedure was proceed according with the our previous work.<sup>15</sup>

Typically, 0.97 g  $\text{Bi}(\text{NO}_3)_3 \cdot 5\text{H}_2\text{O}$  was dissolved in 3.0 ml acetic acid, and the resulting solution was added to 30 ml de-ionized water containing 0.24 g KBr under vigorous stirring. Upon the adding of  $\text{Bi}(\text{NO}_3)_3/\text{HAc}$  solution, yellow precipitates were immediately observed which then became light yellow as addition was completed. After stirring for 20 min at room temperature, the suspension was transferred into a Teflon-lined stainless steel autoclave (40 ml capacity) and heated at 120 °C for 6.0 h. The resulting precipitate was filtrated, washed thoroughly with distilled water to remove any possible ionic species in the product, and then dried at 60 °C overnight.

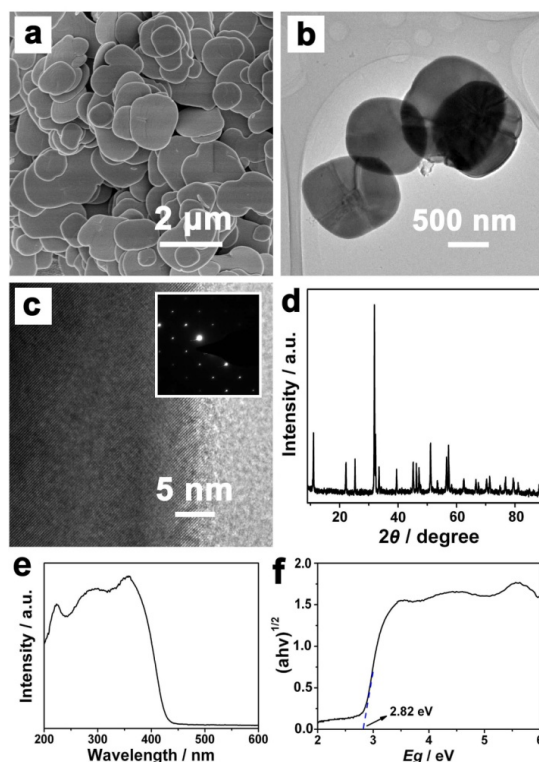

**Fig. S1.** a) SEM image, b) TEM image, c and its inset) HRTEM image and SAED pattern; nanosheets, d) XRD pattern, e) UV-vis diffuse reflectance spectra (DRS), f) The plots of  $(ah\nu)^{1/2}$  versus the energy of light ( $E_g$ ) of the BiOBr nanosheets.

The morphology and structure of the as-prepared BiOBr nanostructures are characterized by using scanning electron microscopy (SEM) and transmission electron microscopy (TEM). The corresponding SEM image (Fig. S1a) and TEM image (Fig. S1b) show that the obtained samples are sheet-like structures with a thickness below 50 nm. High resolution transmission electron microscopy (HRTEM) (Fig. S1c) and selected area electron diffraction (SAED) pattern (the inset of Fig. S1c) of BiOBr demonstrate that the as-prepared BiOBr nanosheets are single-crystalline. The X-ray diffraction data of BiOBr samples is shown in Fig. S1d. All of the detectable reflection peaks can be assigned to a pure tetragonal phase of BiOBr (JCPDS No. 73-2061). The UV-vis diffuse reflectance spectra (DRS) of the BiOBr samples (Fig. S1e) displays its absorption range to 440 nm, corresponding to band-gap energy ( $E_g$ ) of approximately 2.82 eV (Fig. S1f). To monitor the photocatalytic activity of the synthesized BiOBr nanosheets, the as-prepared BiOBr nanosheets are used in the following organic transformations.

#### 4. Typical procedure for the synthesis of substrates

Substrates **1a-1r** were synthesized according to the literature<sup>1</sup>.

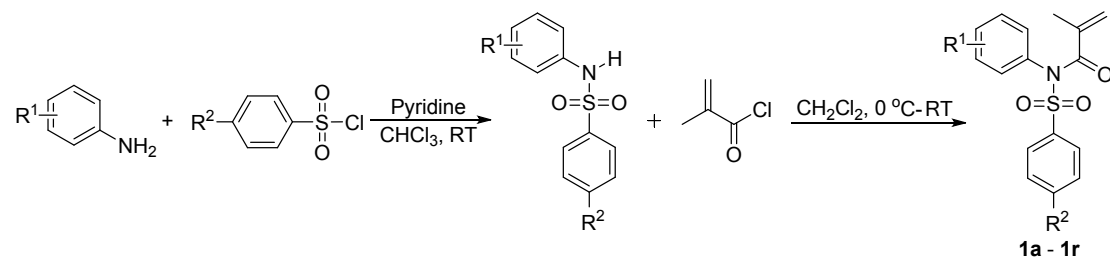

#### Reference:

1. a) Kong, W. Q.; Casimiro, M.; Merino, E.; Nevado, C. *J. Am. Chem. Soc.* **2013**, *135*, 14480; b) Kong, W. Q.; Casimiro, M.; Fuentes, N.; Merino, E.; Nevado, C. *Angew. Chem. Int. Ed.* **2013**, *52*, 13086; c) Li, L.; Deng, M.; Zheng, S.-C.; Xiong, Y.-P.; Tan, B.; Liu, X.-Y. *Org. Lett.* **2014**, *16*, 504; d) Fan, J. H.; Yang, J.; Song, R. J.; Li, J. H. *Org. Lett.* **2015**, *17*, 836; e) Li, Y.-M.; Shen, Y. H.; Chang, K.-J.; Yang, S.-D. *Tetrahedron* **2014**, *70*, 1991.

#### 5. General procedure for light-induced BiOBr nanosheets promoted one-pot tandem trifluoromethylation/aryl migration/desulfonylation and N–H bond formation of alkenes

**1a** (0.2 mmol, 63.1 mg), BiOBr (20.0 mg) and K<sub>2</sub>HPO<sub>4</sub> (98%, 0.6 mmol, 106.6 mg) were weighted to a dried 10 mL schlenk flask under air, and then DMAC (1.0 mL) were added. After degassing under vacuum and refilling with Ar (three times), the Schlenk tube was sealed well. CF<sub>3</sub>SO<sub>2</sub>Cl (98%, 1.0 mmol, 172.0 mg) was added to the mixture via the microinjector. The Schlenk tube was immediately moved to a distance of ca. 30 cm from the light source and the resulting solution was stirred at room temperature under light irradiation until the reaction was completed. Then the reaction mixture was centrifuged. The organic phases were diluted with water (4.0 mL) and extracted with CH<sub>2</sub>Cl<sub>2</sub> (3 × 6.0 mL). The combined organic layers were washed with brine, and dried over anhydrous MgSO<sub>4</sub>. After removal of the solvent, the residue was purified by flash column chromatography on silica gel to give the desired product **3a**. 75% yield, <sup>1</sup>H-NMR (400 MHz, CDCl<sub>3</sub>) δ 7.36 – 7.29 (m, 6H), 7.25 (d, *J* = 8.1 Hz, 2H), 7.10 (t, *J* = 7.1 Hz, 1H), 6.81 (s, 1H), 3.21 (dq, *J* = 15.5, 11.1 Hz, 1H), 2.87 (dq, *J* = 15.6, 11.3 Hz, 1H), 2.40 (s, 3H), 1.87 (s, 3H); <sup>19</sup>F-NMR (376 MHz, CDCl<sub>3</sub>) [ppm] δ -59.04 (t, *J* = 11.1 Hz, 3F); <sup>13</sup>C-NMR (100 MHz, CDCl<sub>3</sub>) [ppm] δ 173.6, 138.0, 137.6, 137.5, 129.9, 129.0, 126.8, 124.6, 126.5 (q, *J* = 277.0 Hz), 119.9, 48.5 (d, *J* = 3.0 Hz), 42.0 (q, *J* = 26.0 Hz), 22.8, 21.0; IR (KBr) ν (cm<sup>-1</sup>): 3317, 2923, 2360, 1670, 1602, 1544, 1503, 1444, 1263, 1139, 810, 746, 697, 649; HRMS (ESI) found: *m/z* 344.1238 [M+Na]<sup>+</sup>; calcd. for C<sub>18</sub>H<sub>18</sub>F<sub>3</sub>NO+Na 344.1238.

## 6. Control experiment

### The addition of TEMPO to the reaction system under standard conditions

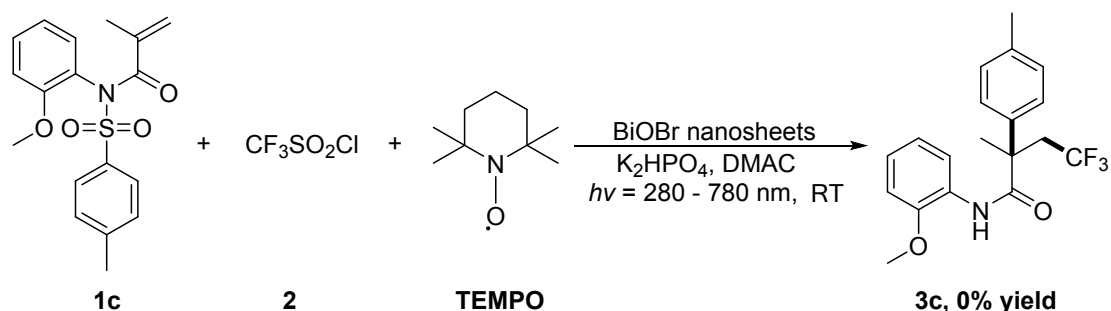

**1c** (0.1 mmol, 34.5 mg), BiOBr (10.0 mg),  $\text{K}_2\text{HPO}_4$  (98%, 0.3 mmol, 53.3 mg) and TEMPO (98%, 0.3 mmol, 47.8 mg) were weighted to a dried 10 mL schlenk flask under air and then DMAC (1.0 mL) were added. After degassing under vacuum and refilling with Ar (three times), the schlenk tube was sealed well.  $\text{CF}_3\text{SO}_2\text{Cl}$  (98%, 0.5 mmol, 86.0 mg) was added to the mixture via the microinjector. The Schlenk tube was immediately moved to a distance of ca. 30 cm from the light source and the resulting solution was stirred at room temperature under light irradiation for 6.0 h. After that, the light source was moved and  $\alpha,\alpha,\alpha$ -trifluorotoluene (internal standard, 98%, 0.1 mmol, 14.3 mg) was added to the Schlenk tube.  $^{19}\text{F}$  NMR analysis of this reaction mixture showed that only trace amount of **3c** was formed. This indicated that this one-pot tandem transformation of alkenes by our photocatalytic strategy proceeded through a radical pathway.

## 7. Copies of NMR Spectra

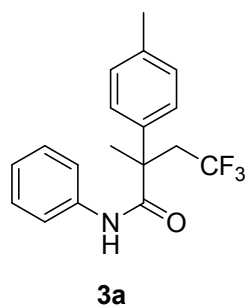

### 4,4,4-trifluoro-2-methyl-N-phenyl-2-(p-tolyl)butanamide (3a)

**M:** 48.2 mg, **Yield:** 75%; **<sup>1</sup>H-NMR** (400 MHz, CDCl<sub>3</sub>) δ 7.36 – 7.29 (m, 6H), 7.25 (d, *J* = 8.1 Hz, 2H), 7.10 (t, *J* = 7.1 Hz, 1H), 6.81 (s, 1H), 3.21 (dq, *J* = 15.5, 11.1 Hz, 1H), 2.87 (dq, *J* = 15.6, 11.3 Hz, 1H), 2.40 (s, 3H), 1.87 (s, 3H); **<sup>19</sup>F-NMR** (376 MHz, CDCl<sub>3</sub>) [ppm] δ –59.04 (t, *J* = 11.1 Hz, 3F); **<sup>13</sup>C-NMR** (100 MHz, CDCl<sub>3</sub>) [ppm] δ 173.6, 138.0, 137.6, 137.5, 129.9, 129.0, 126.8, 124.6, 126.5 (q, *J* = 277.0 Hz), 119.9, 48.5 (d, *J* = 3.0 Hz), 42.0 (q, *J* = 26.0 Hz), 22.8, 21.0; **IR** (KBr) ν (cm<sup>-1</sup>): 3317, 2923, 2360, 1670, 1602, 1544, 1503, 1444, 1263, 1139, 810, 746, 697, 649; **HRMS** (ESI) found: *m/z* 344.1238 [M+Na]<sup>+</sup>; calcd. for C<sub>18</sub>H<sub>18</sub>F<sub>3</sub>NO+Na 344.1238.

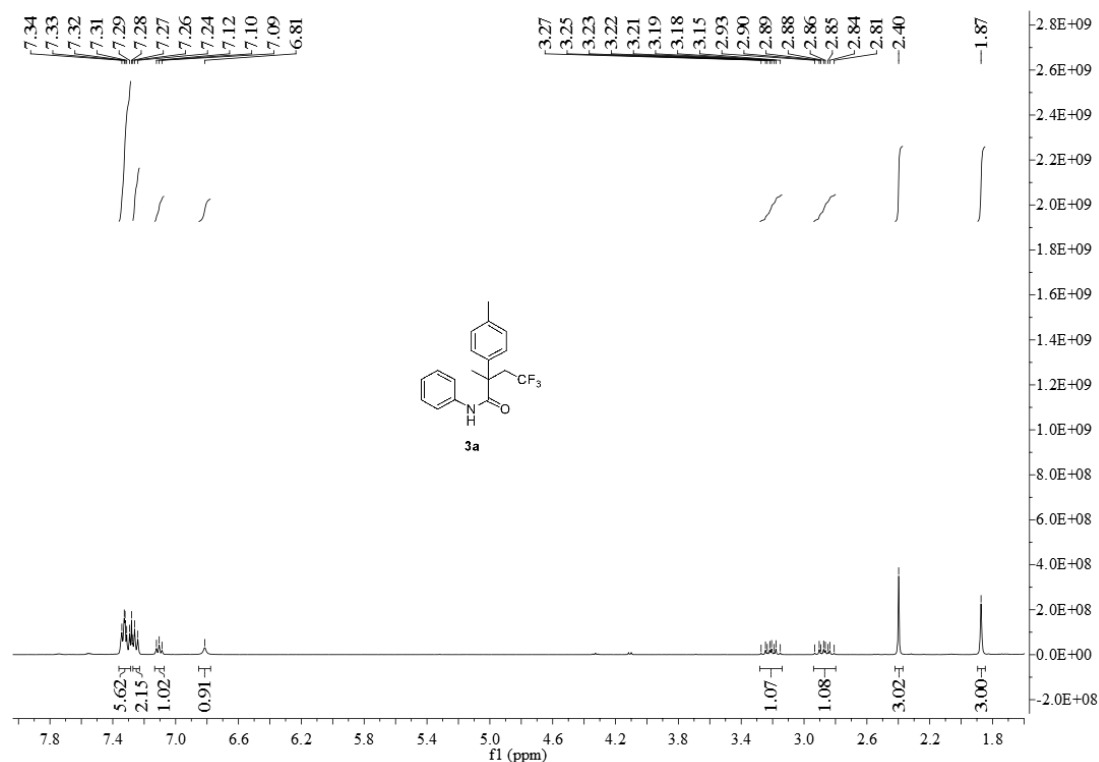

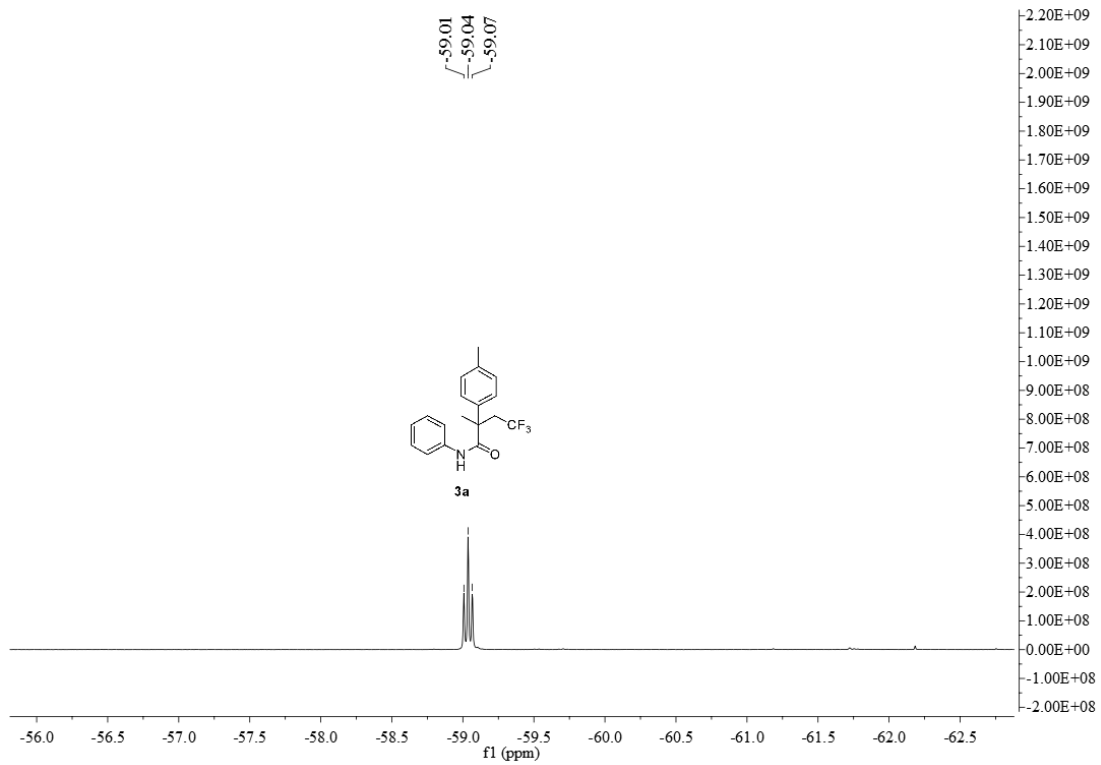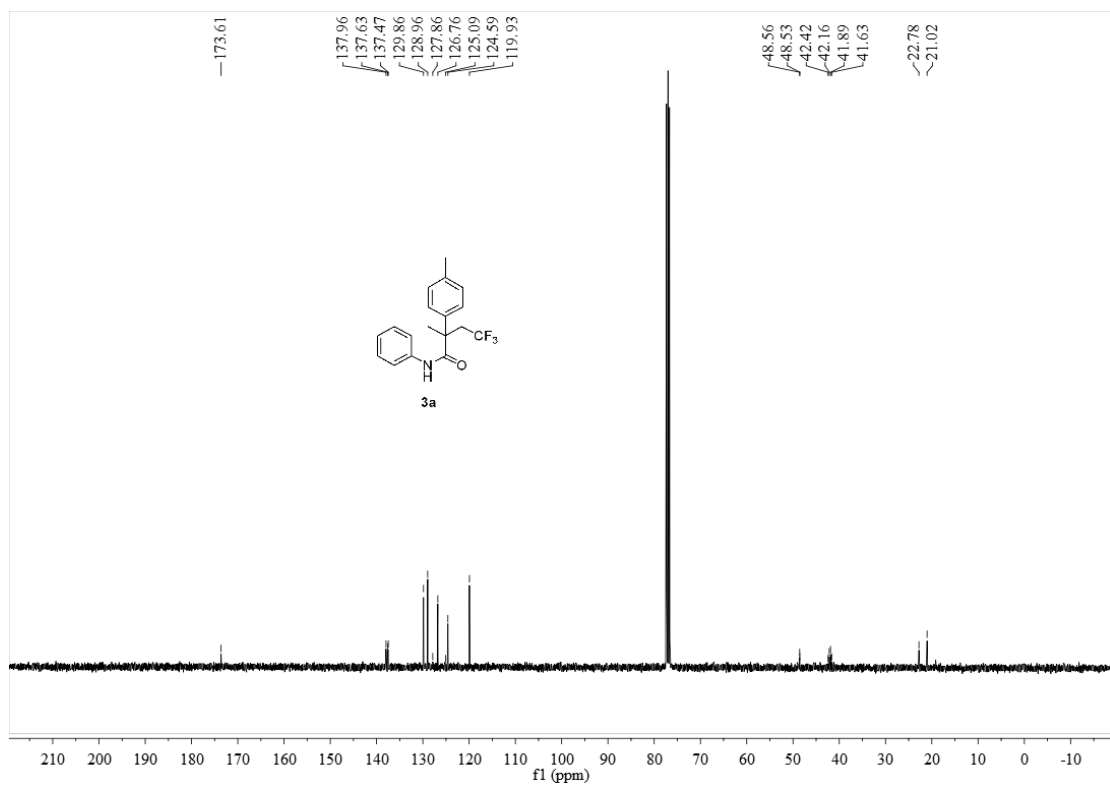



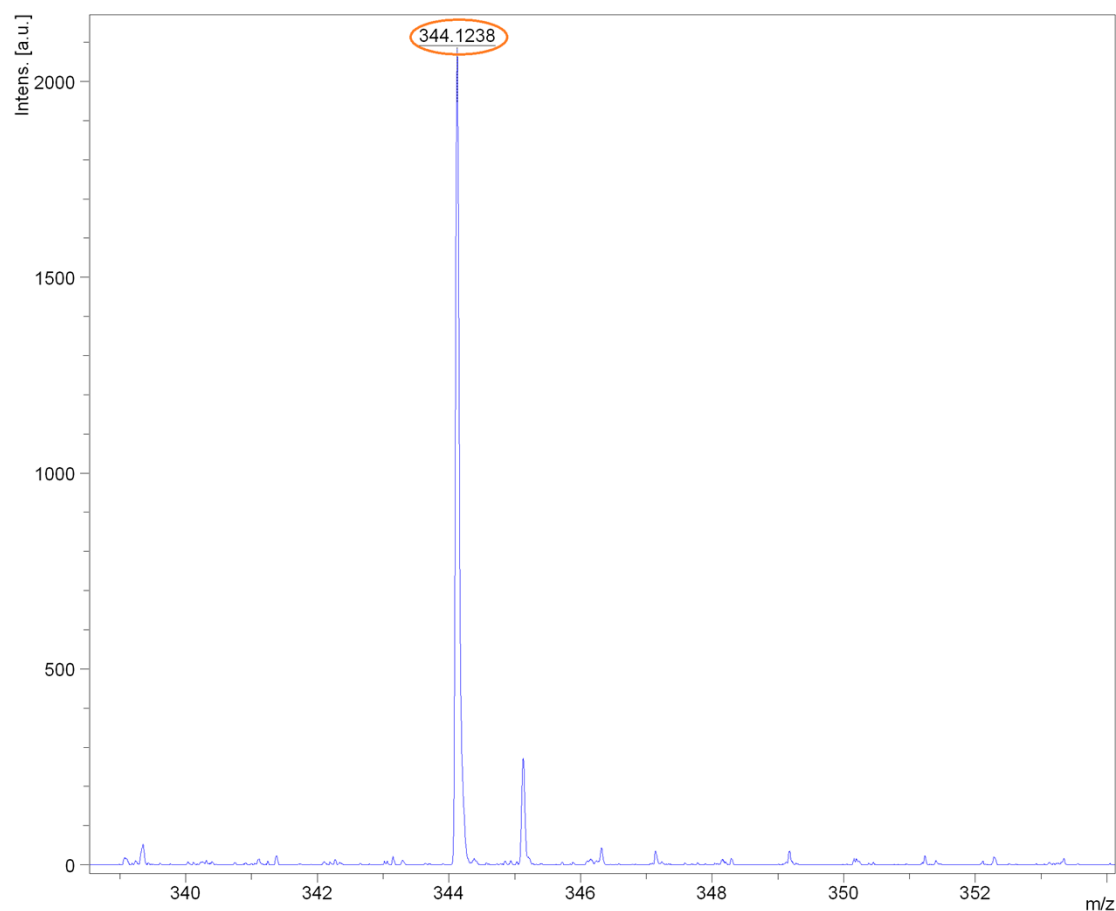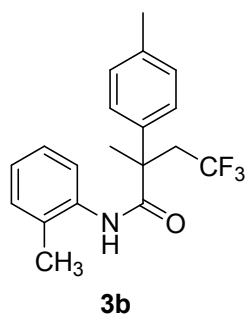

**4,4,4-trifluoro-2-methyl-N-(o-tolyl)-2-(p-tolyl)butanamide (3b)**

**M:** 40.9 mg, **Yield:** 61%; **<sup>1</sup>H-NMR** (400 MHz, CDCl<sub>3</sub>) [ppm]  $\delta$  7.76 (d,  $J$  = 8.0 Hz, 1H), 7.38 (d,  $J$  = 8.2 Hz, 2H), 7.27 (d,  $J$  = 7.6 Hz, 2H), 7.20 (t,  $J$  = 7.6 Hz, 1H), 7.11 (d,  $J$  = 6.8 Hz, 1H), 7.05 (t,  $J$  = 7.1 Hz, 1H), 6.75 (s, 1H), 3.24 (dq,  $J$  = 15.6, 11.0 Hz, 1H), 2.93 (dq,  $J$  = 15.6, 11.3 Hz, 1H), 2.40 (s, 3H), 1.91 (s, 3H), 1.85 (s, 3H); **<sup>19</sup>F-NMR** (376 MHz, CDCl<sub>3</sub>) [ppm]  $\delta$  -58.90 (t,  $J$  = 11.1 Hz, 3F); **<sup>13</sup>C-NMR** (100 MHz, CDCl<sub>3</sub>) [ppm]  $\delta$  173.7, 138.0, 137.9, 135.4, 130.4, 129.8, 128.7, 126.8, 126.7, 126.6 (q,  $J$  = 279.0 Hz), 125.2, 122.3, 48.6 (d,  $J$  = 1.0 Hz), 41.7 (q,  $J$  = 28.0 Hz), 22.9, 21.0, 17.0; **IR** (KBr)  $\nu$  (cm<sup>-1</sup>): 3277, 2923, 2856, 2360, 1666, 1516, 1455, 1366, 1303, 1260, 1157, 1121, 1080, 1038, 953, 815, 749, 672, 581; **HRMS** (ESI) found:  $m/z$  358.1392 [M+Na]<sup>+</sup>; calcd. for C<sub>19</sub>H<sub>20</sub>F<sub>3</sub>NO+Na 358.1395.

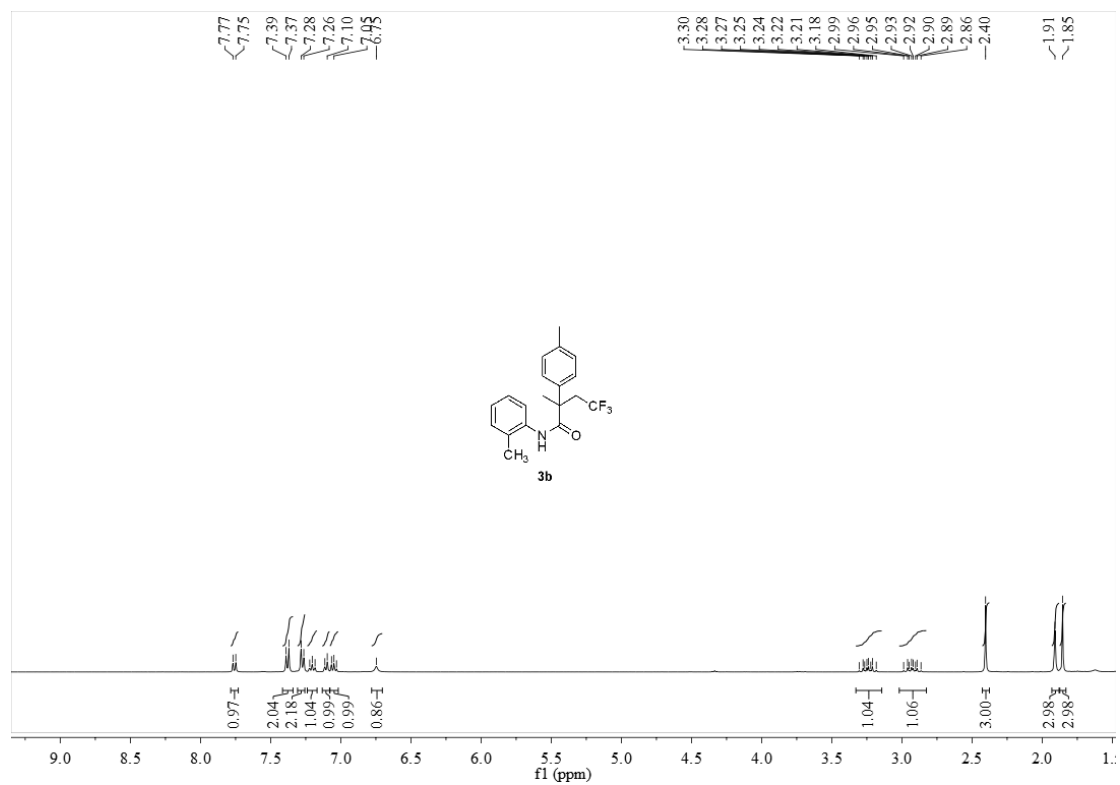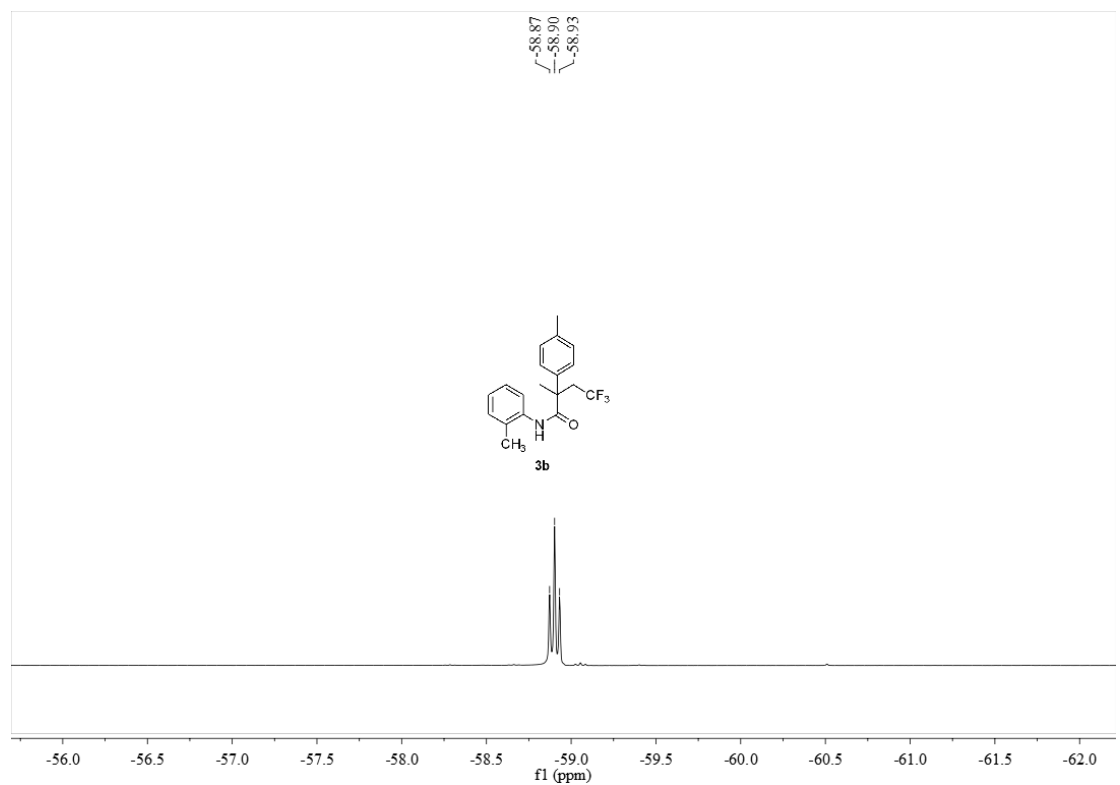

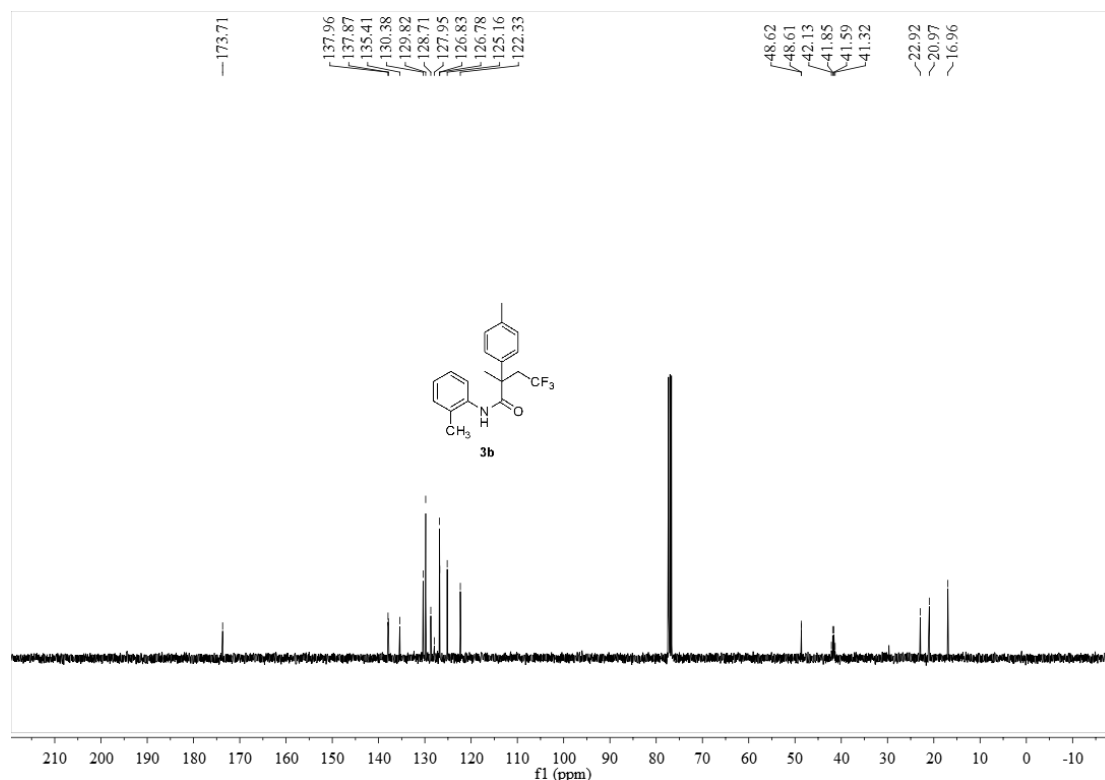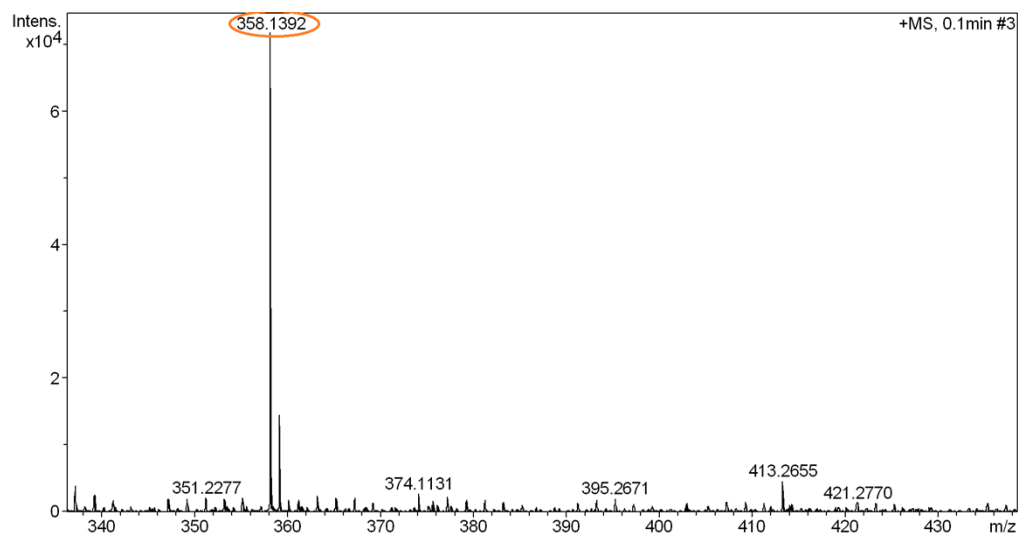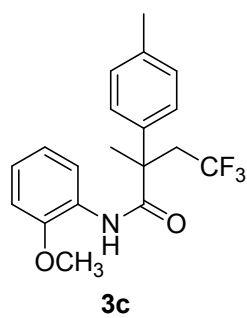

**4,4,4-trifluoro-N-(2-methoxyphenyl)-2-methyl-2-(p-tolyl)butanamide (3c)**

**M:** 53.4 mg, **Yield:** 76%; **<sup>1</sup>H-NMR** (400 MHz, CDCl<sub>3</sub>) [ppm] δ 8.28 (d, *J* = 7.8 Hz, 1H), 7.66 (s,

1H), 7.35 (d,  $J = 8.1$  Hz, 2H), 7.24 (d,  $J = 8.0$  Hz, 2H), 7.02 (t,  $J = 7.6$  Hz, 1H), 6.96 (t,  $J = 7.6$  Hz, 1H), 6.79 (d,  $J = 8.0$  Hz, 1H), 3.66 (s, 3H), 3.24 (dq,  $J = 15.5, 11.1$  Hz, 1H), 2.88 (dq,  $J = 15.5, 11.3$  Hz, 1H), 2.39 (s, 3H), 1.88 (s, 3H);  **$^{19}\text{F}$ -NMR** (376 MHz,  $\text{CDCl}_3$ ) [ppm]  $\delta$  -59.00 (t,  $J = 11.1$  Hz, 3F);  **$^{13}\text{C}$ -NMR** (100 MHz,  $\text{CDCl}_3$ ) [ppm]  $\delta$  173.2, 148.2, 138.0, 137.5, 129.6, 127.5, 126.3, 126.6 (q,  $J = 279.0$  Hz), 123.9, 121.1, 119.6, 110.1, 55.7, 48.7 (d,  $J = 1.0$  Hz), 41.9 (q,  $J = 26.0$  Hz), 29.7, 21.0; **IR** (KBr)  $\nu$  ( $\text{cm}^{-1}$ ): 3381, 2919, 2851, 2359, 1684, 1601, 1526, 1463, 1364, 1257, 1119, 1034, 938, 745; **HRMS** (ESI) found:  $m/z$  374.1338  $[\text{M}+\text{Na}]^+$ ; calcd. for  $\text{C}_{19}\text{H}_{20}\text{F}_3\text{NO}_2+\text{Na}$  374.1344.

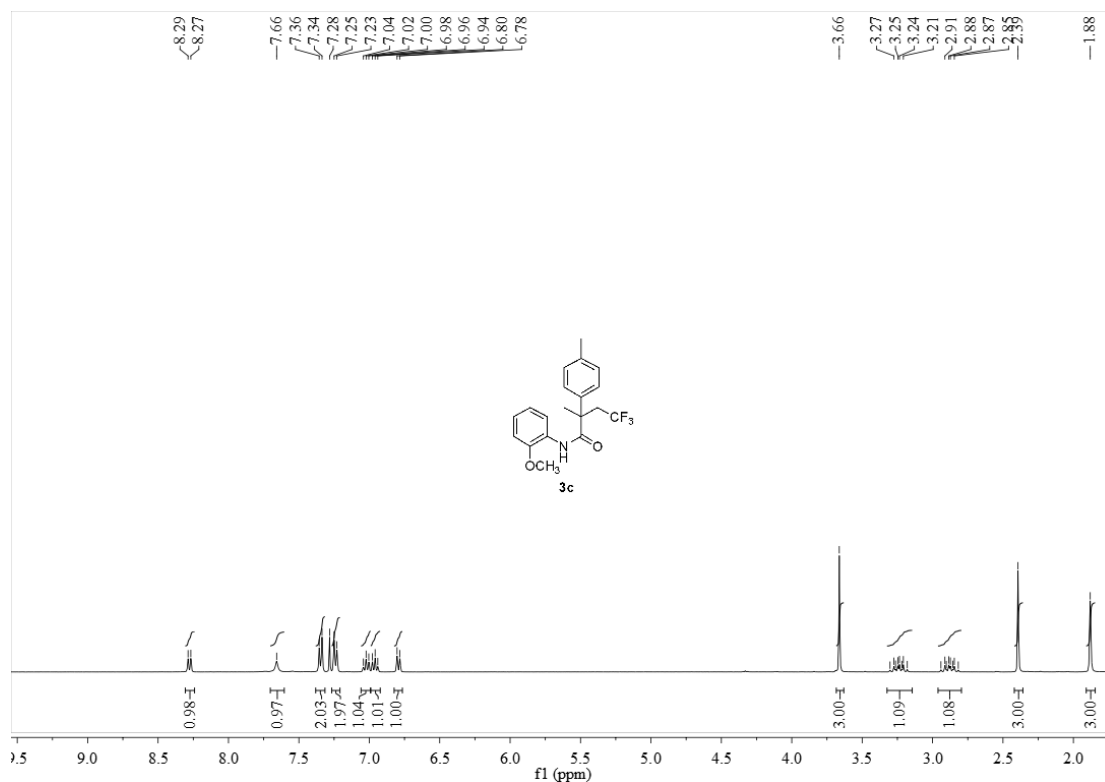

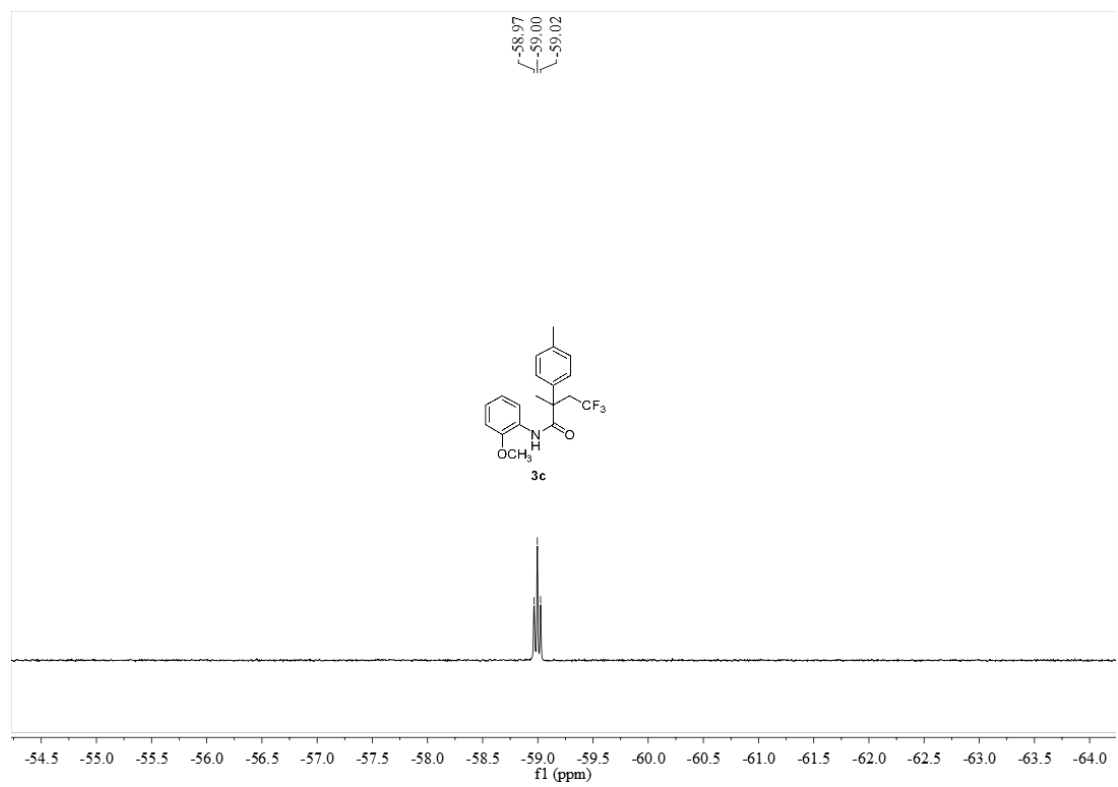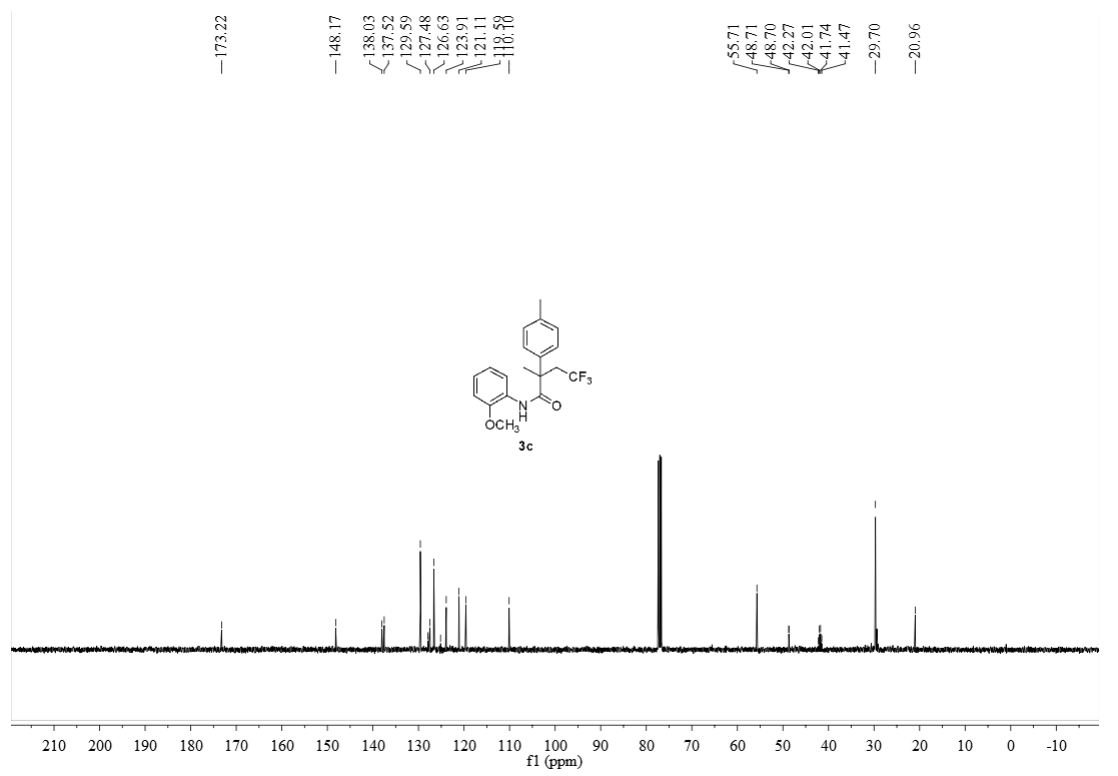

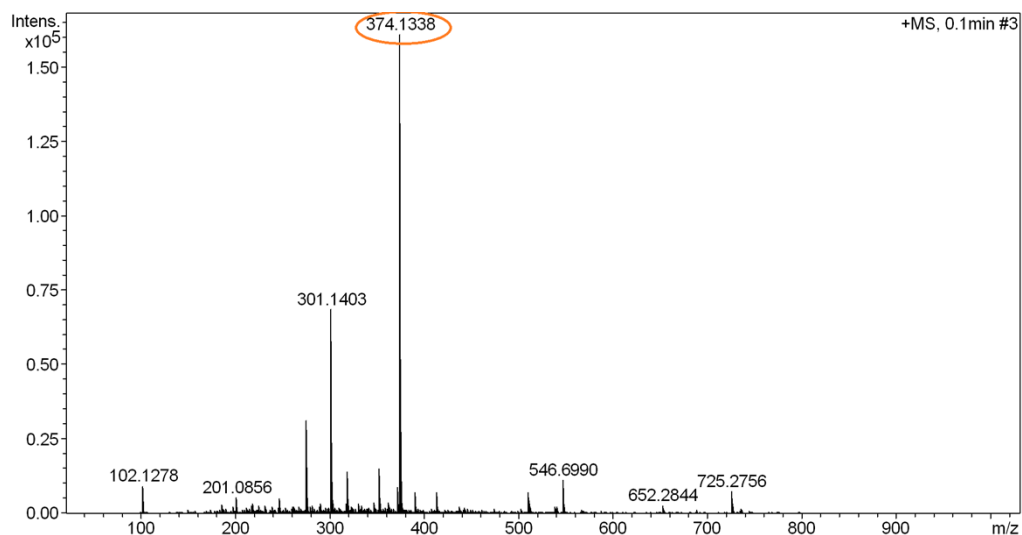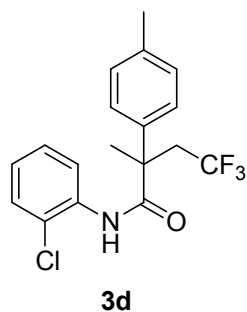

**N-(2-chlorophenyl)-4,4,4-trifluoro-2-methyl-2-(p-tolyl)butanamide (3d)**

**M:** 37.7 mg, **Yield:** 53%; **<sup>1</sup>H-NMR** (400 MHz, CDCl<sub>3</sub>) [ppm] δ 8.29 (d, *J* = 8.3 Hz, 1H), 7.52 (s, 1H), 7.36 (d, *J* = 8.2 Hz, 2H), 7.27 (t, *J* = 8.0 Hz, 4H), 7.02 (td, *J* = 7.8, 1.4 Hz, 1H), 3.23 (dq, *J* = 15.6, 11.0 Hz, 1H), 2.91 (dq, *J* = 15.6, 11.2 Hz, 1H), 2.39 (s, 3H), 1.91 (s, 3H); **<sup>19</sup>F-NMR** (376 MHz, CDCl<sub>3</sub>) [ppm] δ -58.97 (t, *J* = 11.0 Hz, 3F); **<sup>13</sup>C-NMR** (100 MHz, CDCl<sub>3</sub>) [ppm] δ 173.6, 138.0, 137.3, 134.4, 129.9, 128.9, 127.7, 126.7, 126.4 (q, *J* = 276.0 Hz), 124.8, 123.2, 121.4, 48.8 (d, *J* = 1.0 Hz), 41.8 (q, *J* = 28.0 Hz), 22.7, 21.0; **IR** (KBr) ν (cm<sup>-1</sup>): 3379, 2986, 2928, 2360, 1693, 1592, 1520, 1438, 1370, 1304, 1260, 1123, 1081, 1037, 940, 819, 753, 633, 566; **HRMS** (ESI) found: *m/z* 378.0849 [M+Na]<sup>+</sup>; calcd. for C<sub>18</sub>H<sub>17</sub>ClF<sub>3</sub>NO+Na 378.0849.

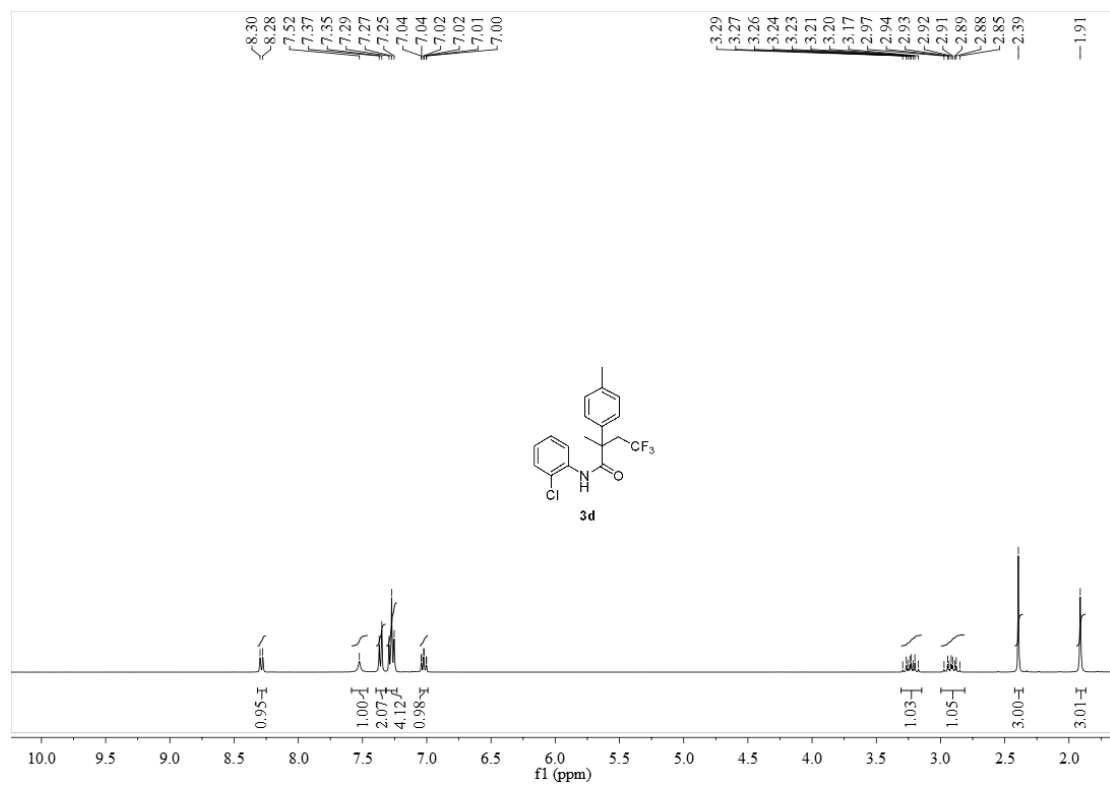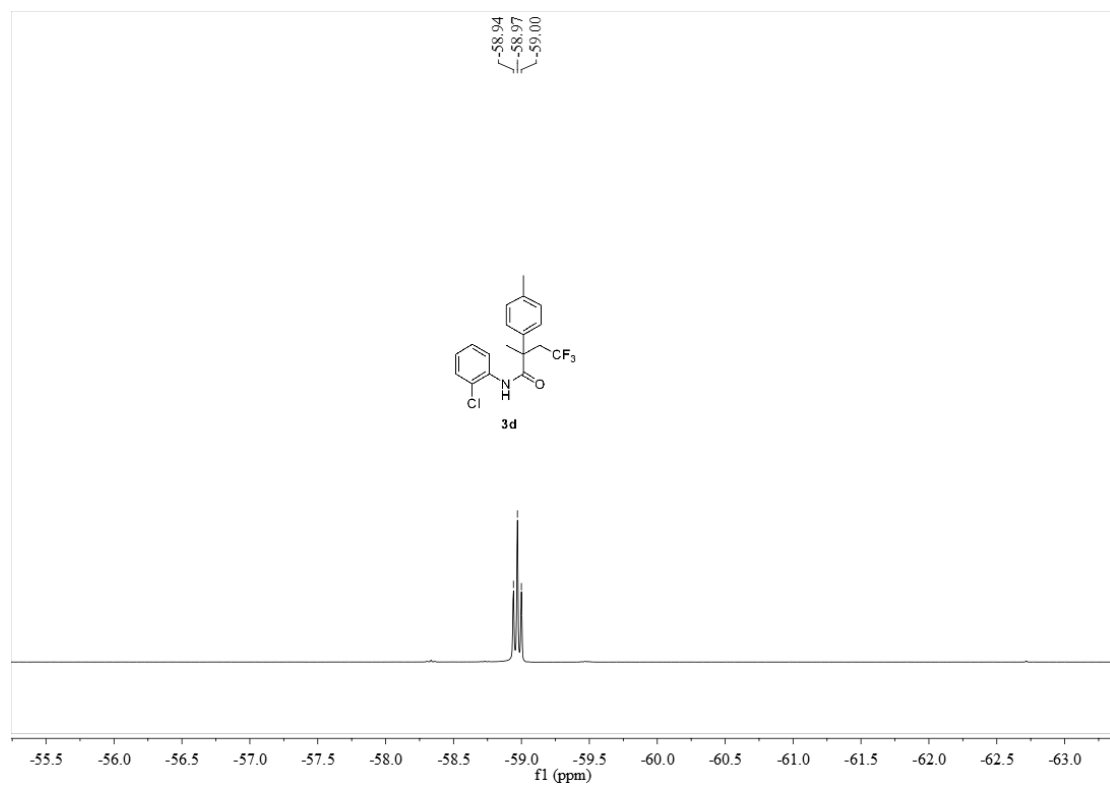

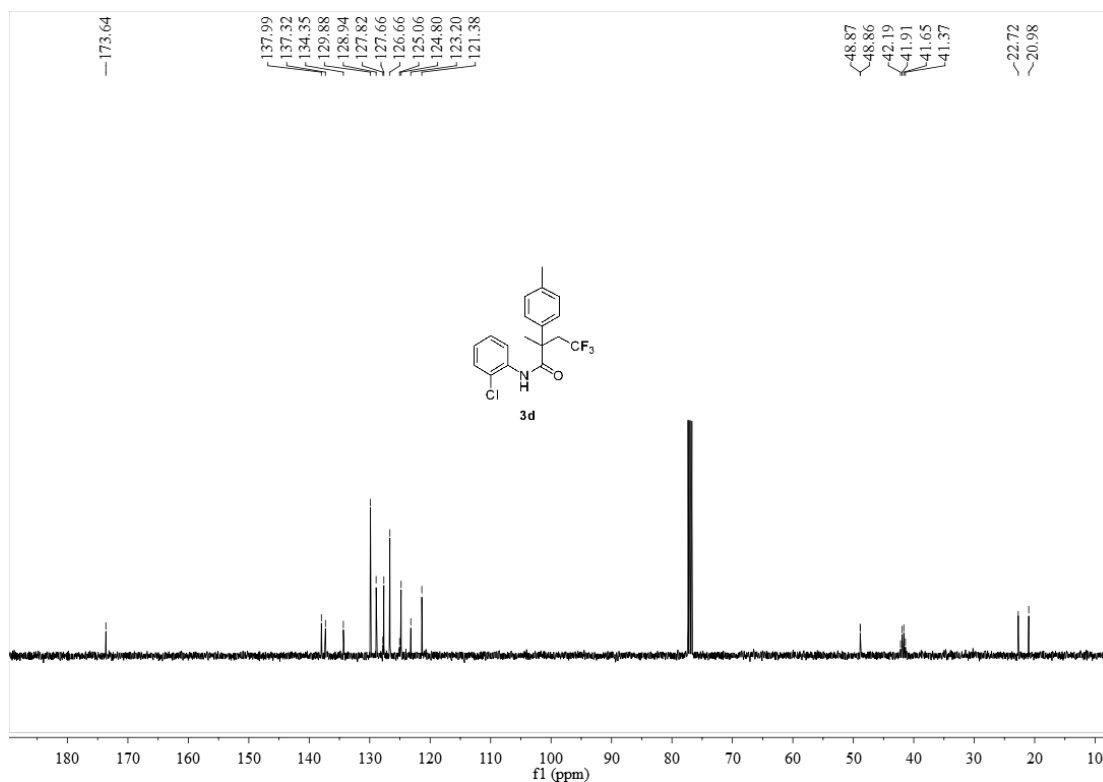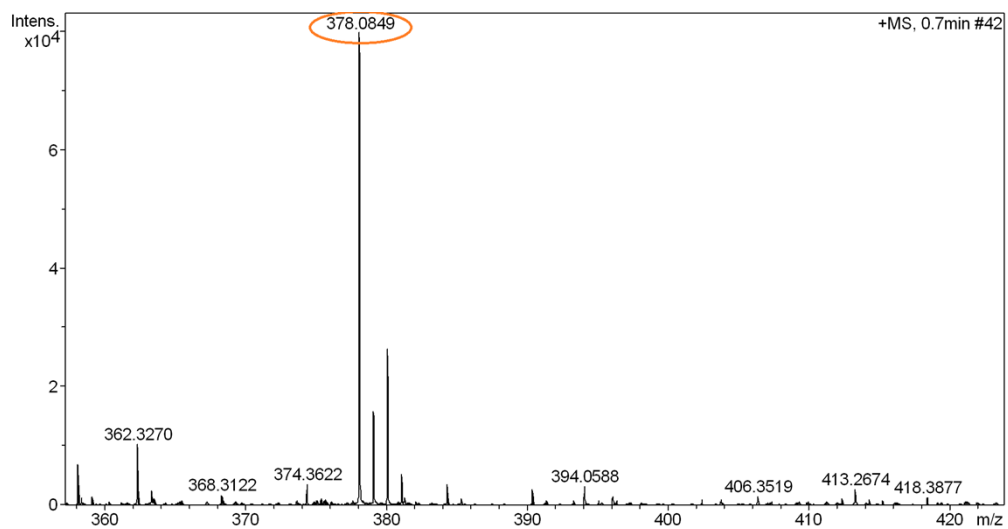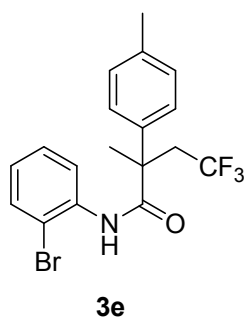

**N-(2-bromophenyl)-4,4,4-trifluoro-2-methyl-2-(p-tolyl)butanamide (3e)**

**M:** 42.4 mg, **Yield:** 53%; **<sup>1</sup>H-NMR** (400 MHz, CDCl<sub>3</sub>) [ppm] δ 8.28 (d, *J* = 8.2 Hz, 1H), 7.53 (s,



1H), 7.45 (d,  $J = 8.0$  Hz, 1H), 7.37 (d,  $J = 8.2$  Hz, 2H), 7.34–7.23 (m, 3H), 6.95 (t,  $J = 8.2$  Hz, 1H), 3.24 (dq,  $J = 15.5, 11.0$  Hz, 1H), 2.92 (dq,  $J = 15.5, 11.2$  Hz, 1H), 2.39 (s, 3H), 1.92 (s, 3H);  **$^{19}\text{F}$ -NMR** (376 MHz,  $\text{CDCl}_3$ ) [ppm]  $\delta$  -58.94 (t,  $J = 11.0$  Hz, 3F);  **$^{13}\text{C}$ -NMR** (100 MHz,  $\text{CDCl}_3$ ) [ppm]  $\delta$  173.7, 138.0, 137.3, 135.5, 132.2, 129.9, 128.3, 126.7, 126.5 (q,  $J = 277.0$  Hz), 125.3, 121.6, 113.6, 48.9 (d,  $J = 1.0$  Hz), 41.8 (q,  $J = 28.0$  Hz), 22.7, 21.0; **IR** (KBr)  $\nu$  ( $\text{cm}^{-1}$ ): 3361, 2924, 2855, 2361, 1693, 1587, 1518, 1434, 1368, 1301, 1260, 1206, 1158, 1121, 1080, 1032, 941, 816, 752, 668, 564; **HRMS** (ESI) found:  $m/z$  422.0335  $[\text{M}+\text{Na}]^+$ ; calcd. for  $\text{C}_{18}\text{H}_{17}\text{BrF}_3\text{NO}+\text{Na}$  422.0344.

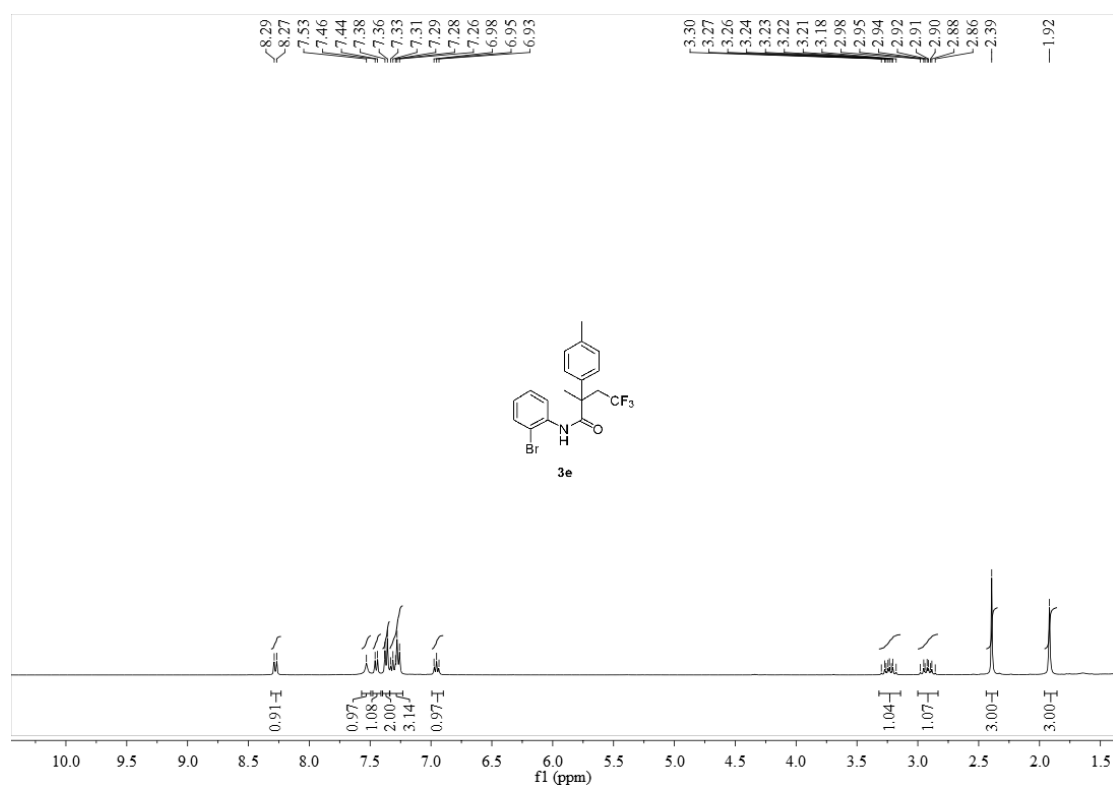

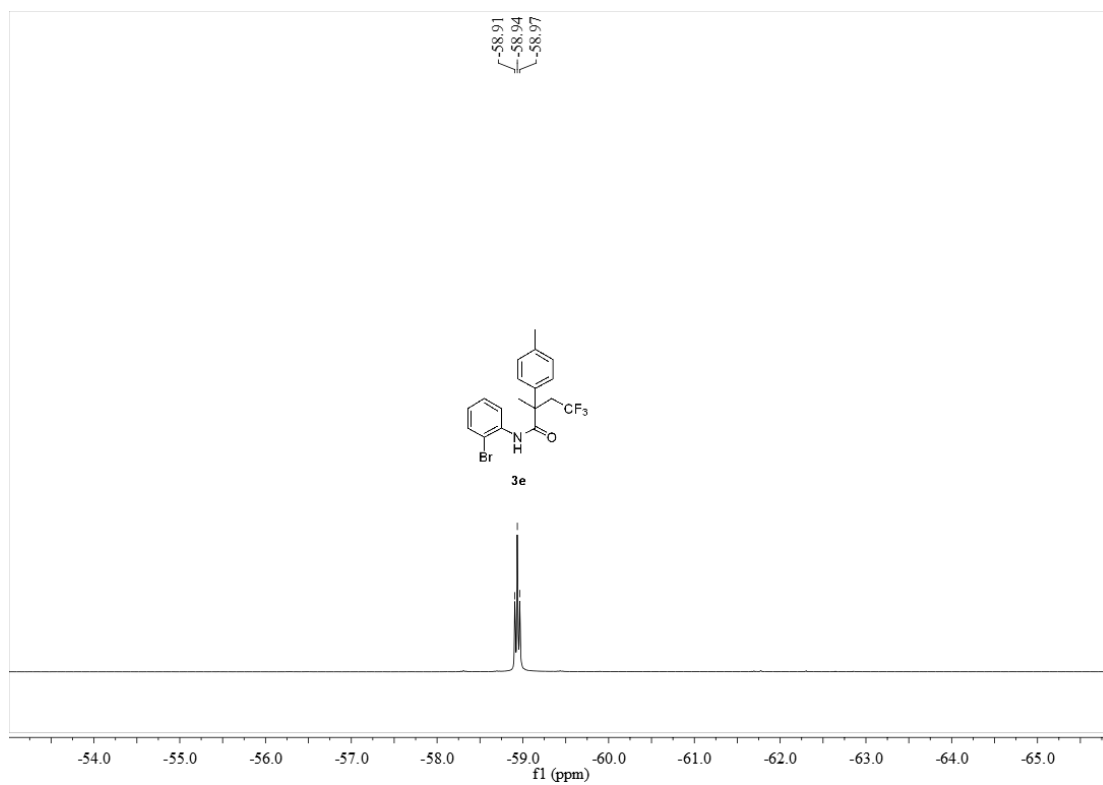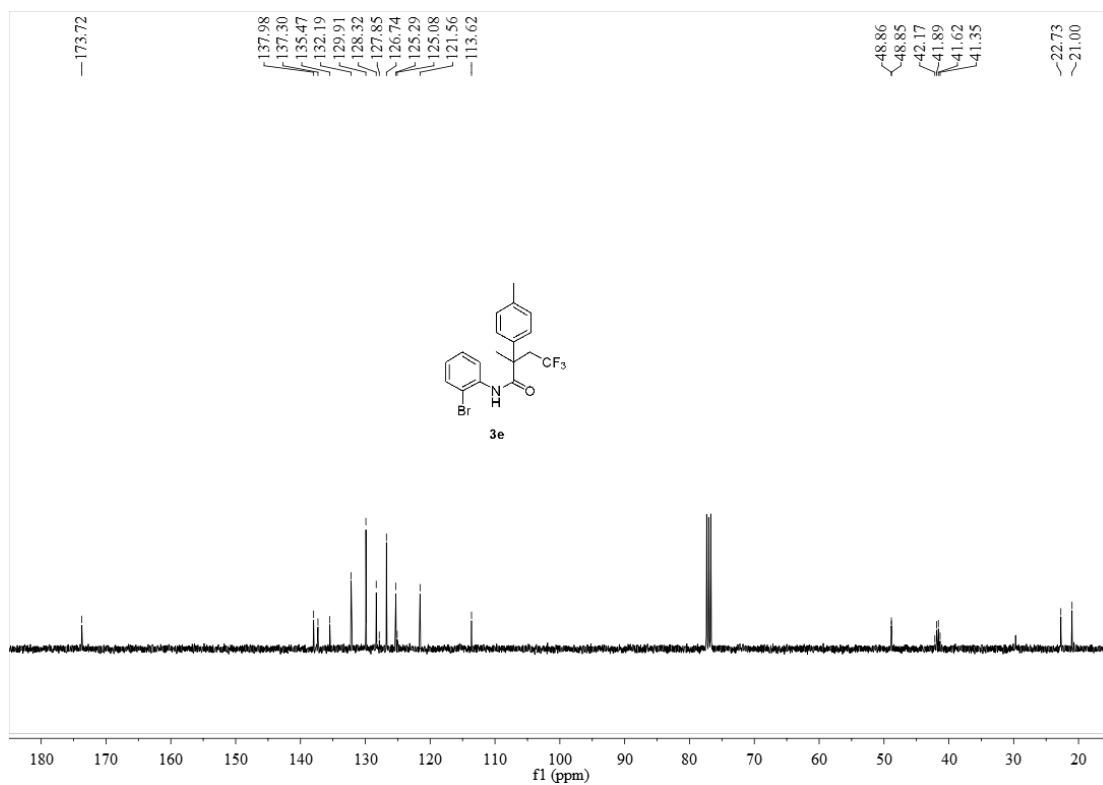

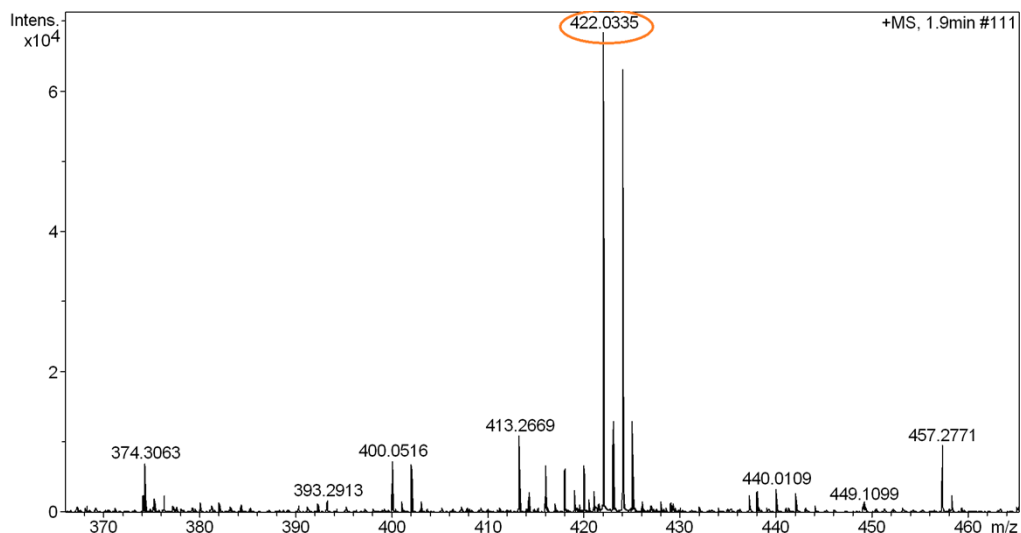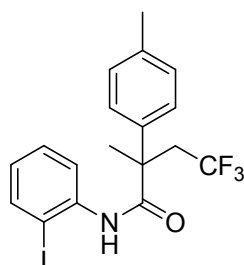

**3f**

**4,4,4-trifluoro-N-(2-iodophenyl)-2-methyl-2-(p-tolyl)butanamide (3f)**

**M:** 36.7 mg, **Yield:** 41%; **<sup>1</sup>H-NMR** (400 MHz, CDCl<sub>3</sub>) [ppm]  $\delta$  8.18 (dd,  $J$  = 8.2, 1.3 Hz, 1H), 7.69 (dd,  $J$  = 8.0, 1.3 Hz, 1H), 7.41–7.30 (m, 4H), 7.27 (d,  $J$  = 8.8 Hz, 2H), 6.82 (td,  $J$  = 7.8, 1.5 Hz, 1H), 3.23 (dq,  $J$  = 15.6, 11.0 Hz, 1H), 2.91 (dq,  $J$  = 15.6, 11.2 Hz, 1H), 2.38 (s, 3H), 1.93 (s, 3H); **<sup>19</sup>F-NMR** (376 MHz, CDCl<sub>3</sub>) [ppm]  $\delta$  –58.93 (t,  $J$  = 11.1 Hz, 3F); **<sup>13</sup>C-NMR** (100 MHz, CDCl<sub>3</sub>) [ppm]  $\delta$  173.9, 138.8, 138.0, 137.9, 137.4, 130.0, 129.2, 126.9, 126.5 (q,  $J$  = 277.0 Hz), 126.0, 121.5, 89.5, 48.8 (d,  $J$  = 1.0 Hz), 41.8 (q,  $J$  = 27.0 Hz), 22.8, 21.0; **IR** (KBr)  $\nu$  (cm<sup>-1</sup>): 3346, 2956, 2866, 2359, 1690, 1581, 1515, 1431, 1366, 1297, 1259, 1121, 1080, 1032, 938, 816, 751, 652, 561; **HRMS** (ESI) found:  $m/z$  470.0212 [M+Na]<sup>+</sup>; calcd. for C<sub>18</sub>H<sub>17</sub>IF<sub>3</sub>NO+Na 470.0205.

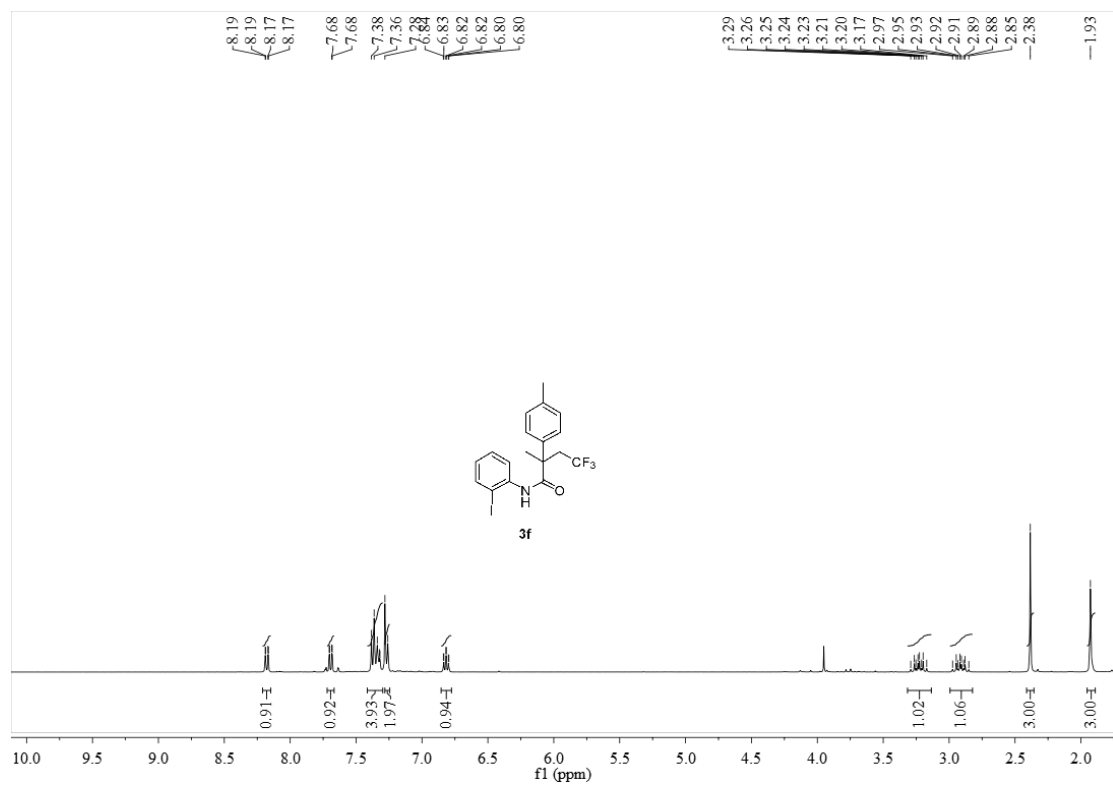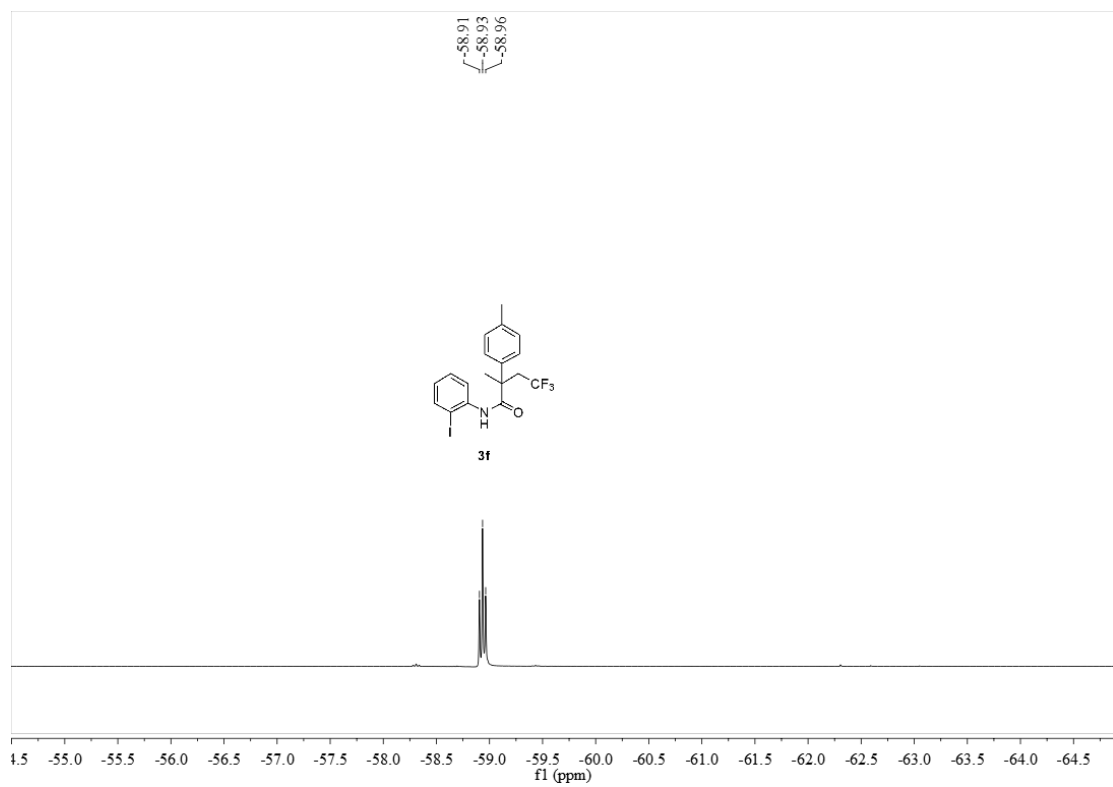

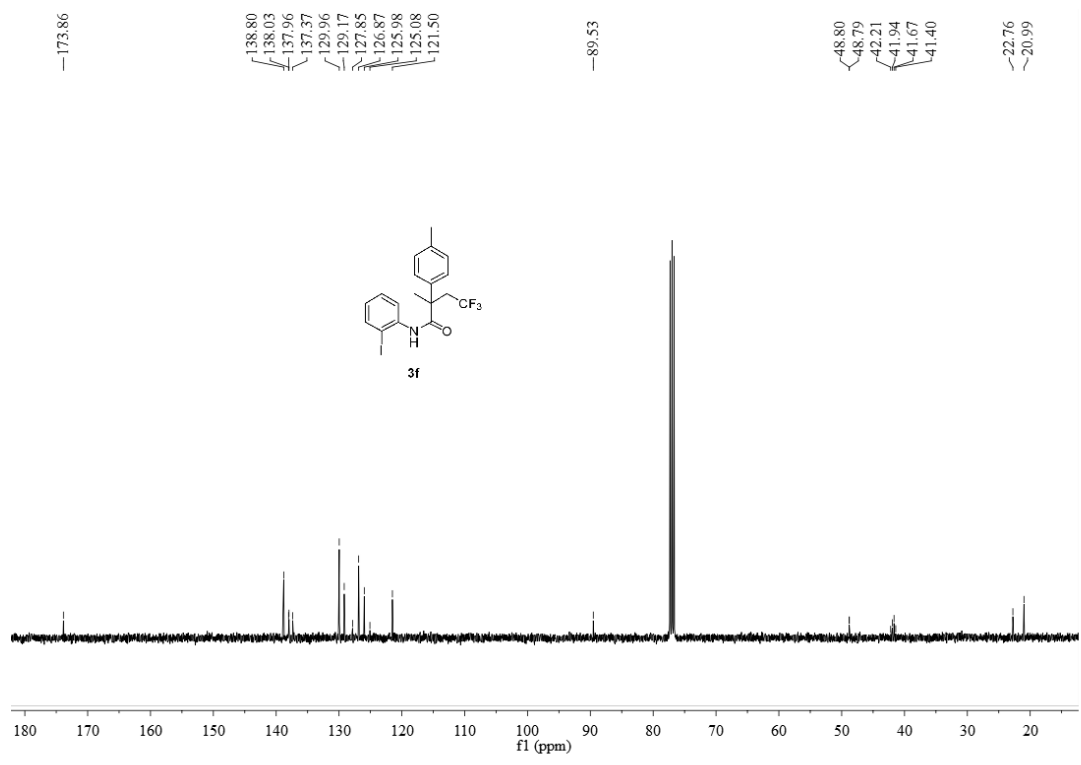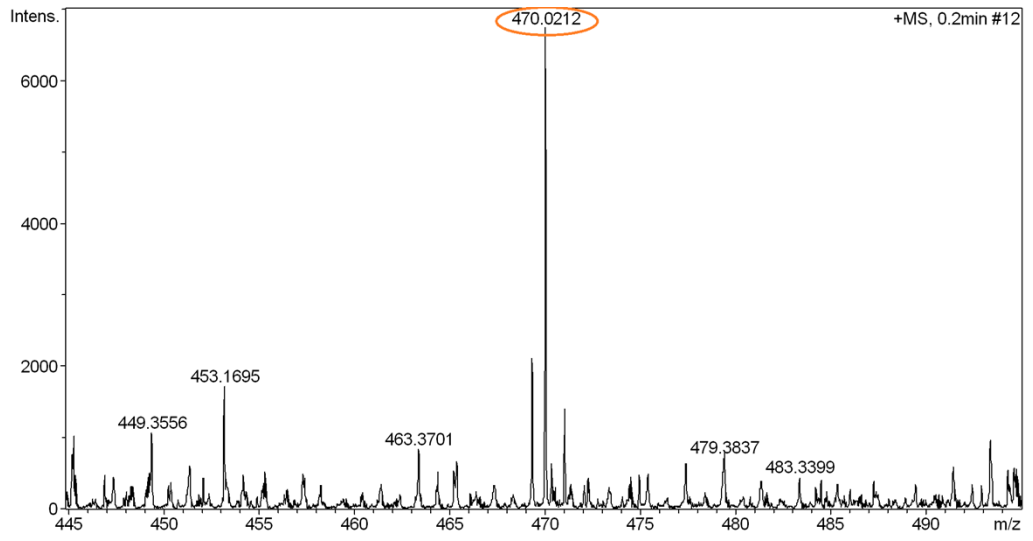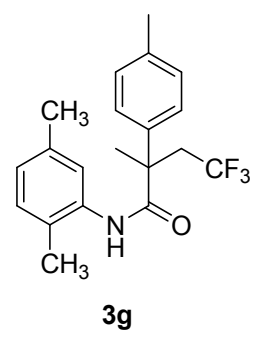

**N-(2,5-dimethylphenyl)-4,4,4-trifluoro-2-methyl-2-(p-tolyl)butanamide (3g)**

**M:** 36.3 mg, **Yield:** 52%; **<sup>1</sup>H-NMR** (400 MHz, CDCl<sub>3</sub>) [ppm] δ 7.61 (s, 1H), 7.37 (d, *J* = 8.2 Hz,

2H), 7.27 (d,  $J = 8.7$  Hz, 2H), 6.98 (d,  $J = 7.7$  Hz, 1H), 6.86 (d,  $J = 7.6$  Hz, 1H), 6.71 (s, 1H), 3.24 (dq,  $J = 15.6, 11.0$  Hz, 1H), 2.92 (dq,  $J = 15.6, 11.3$  Hz, 1H), 2.40 (s, 3H), 2.32 (s, 3H), 1.90 (s, 3H), 1.81 (s, 3H);  $^{19}\text{F-NMR}$  (376 MHz,  $\text{CDCl}_3$ ) [ppm]  $\delta -58.90$  (t,  $J = 11.1$  Hz, 3F);  $^{13}\text{C-NMR}$  (100 MHz,  $\text{CDCl}_3$ ) [ppm]  $\delta 173.7, 137.9, 137.9, 136.6, 135.2, 130.2, 129.8, 126.8, 126.6$  (q,  $J = 277.0$  Hz), 125.9, 125.5, 122.8, 48.6 (d,  $J = 1.0$  Hz), 41.7 (q,  $J = 27.0$  Hz), 22.9 (t,  $J = 1.5$  Hz), 21.1, 21.0, 16.5; **IR** (KBr)  $\nu$  ( $\text{cm}^{-1}$ ): 3312, 2928, 2864, 2359, 1728, 1669, 1581, 1524, 1369, 1262, 1163, 1124, 1079, 1039, 950, 810, 646, 576; **HRMS** (ESI) found:  $m/z$  372.1549  $[\text{M}+\text{Na}]^+$ ; calcd. for  $\text{C}_{20}\text{H}_{22}\text{F}_3\text{NO}+\text{Na}$  372.1551.

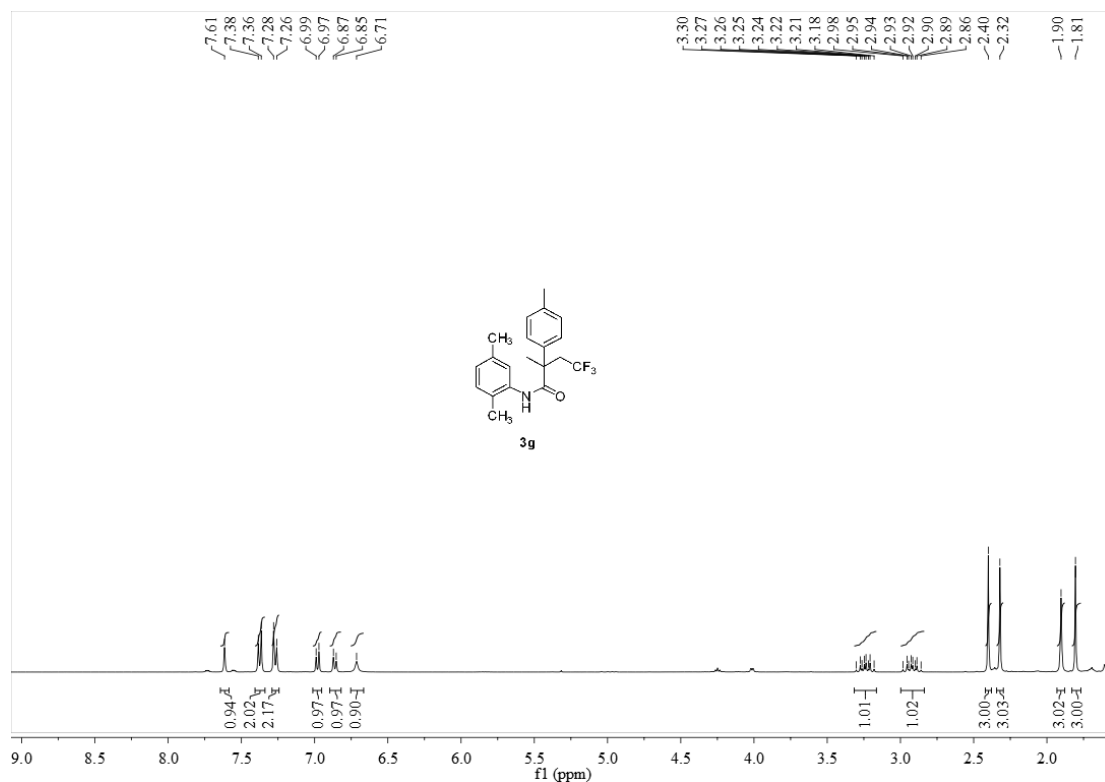

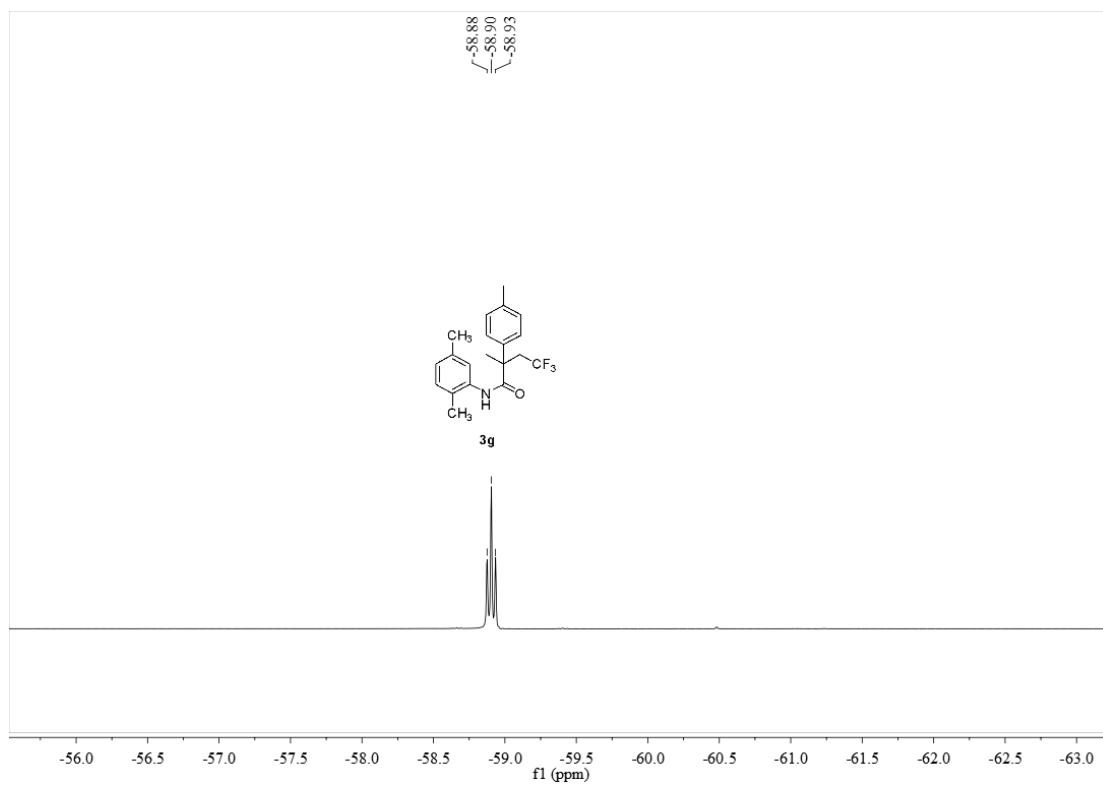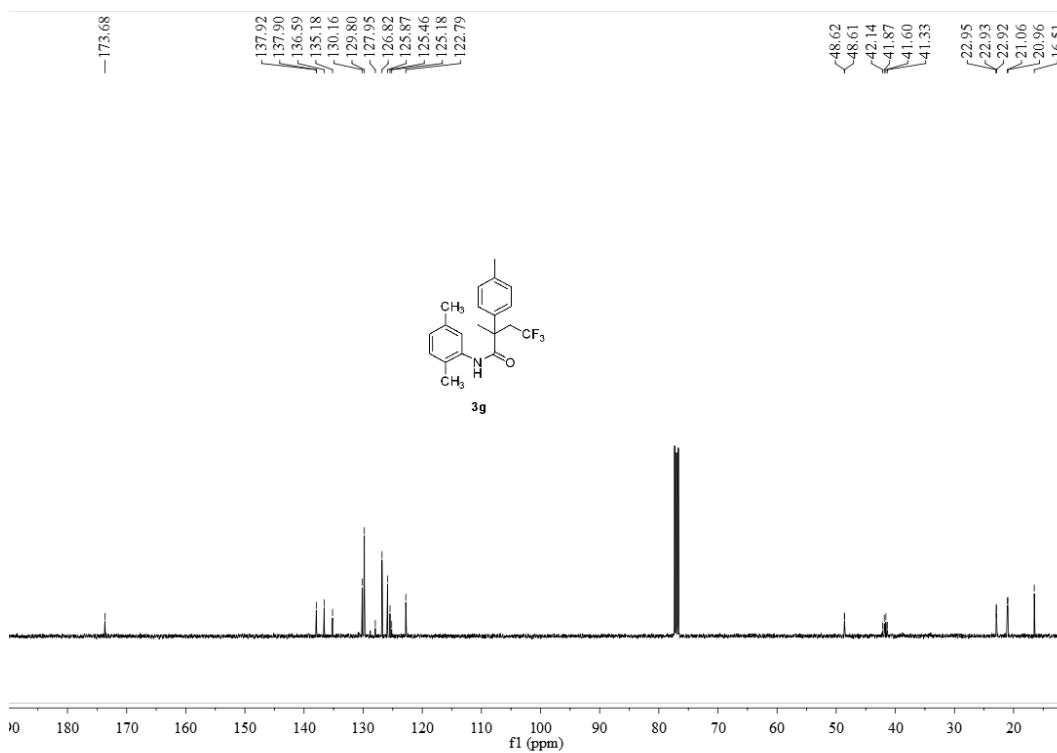

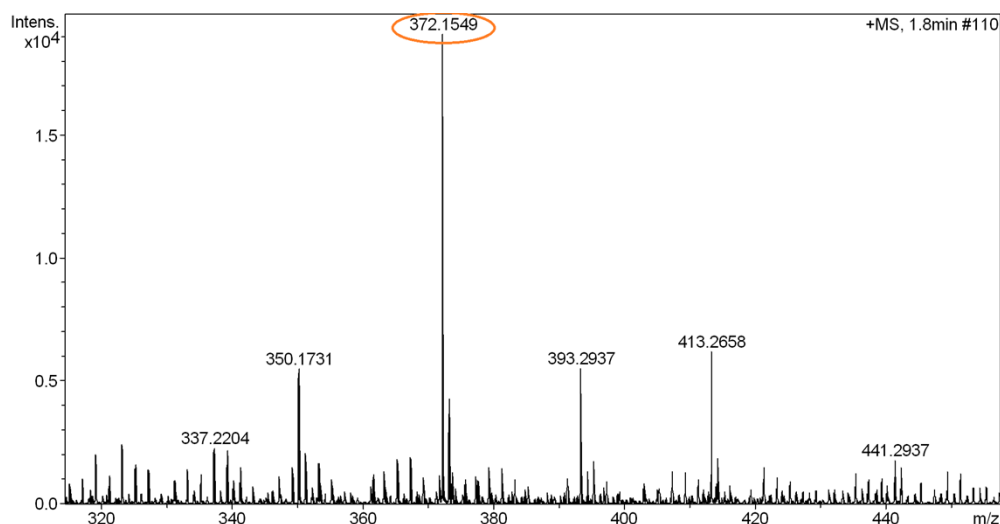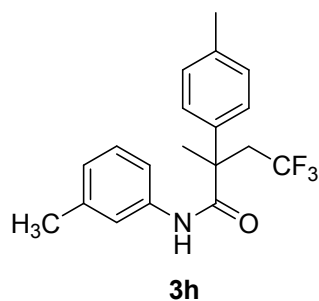

**4,4,4-trifluoro-2-methyl-N-(m-tolyl)-2-(p-tolyl)butanamide (3h)**

**M:** 24.8 mg, **Yield:** 37%; **<sup>1</sup>H-NMR** (400 MHz, CDCl<sub>3</sub>) [ppm]  $\delta$  7.35 (d,  $J$  = 8.2 Hz, 2H), 7.28 (t,  $J$  = 8.5 Hz, 2H), 7.23 (s, 1H), 7.19 (t,  $J$  = 7.8 Hz, 1H), 7.13 (d,  $J$  = 8.1 Hz, 1H), 6.94 (d,  $J$  = 7.3 Hz, 1H), 6.83 (s, 1H), 3.23 (dq,  $J$  = 15.6, 11.1 Hz, 1H), 2.89 (dq,  $J$  = 15.5, 11.2 Hz, 1H), 2.42 (s, 3H), 2.34 (s, 3H), 1.89 (s, 3H); **<sup>19</sup>F-NMR** (376 MHz, CDCl<sub>3</sub>) [ppm]  $\delta$  -59.02 (t,  $J$  = 11.1 Hz, 3F); **<sup>13</sup>C-NMR** (100 MHz, CDCl<sub>3</sub>) [ppm]  $\delta$  173.6, 139.0, 137.9, 137.4, 130.9, 129.9, 128.8, 126.8, 126.5 (q,  $J$  = 277.0 Hz), 125.4, 120.6, 117.0, 48.6 (d,  $J$  = 1.0 Hz), 42.1 (q,  $J$  = 26.5 Hz), 22.8, 21.4, 21.0; **IR** (KBr)  $\nu$  (cm<sup>-1</sup>): 3317, 2924, 2866, 2359, 1722, 1672, 1603, 1532, 1487, 1366, 1263, 1125, 1078, 1040, 949, 777, 688, 562; **HRMS** (ESI) found:  $m/z$  358.1388 [M+Na]<sup>+</sup>; calcd. for C<sub>19</sub>H<sub>20</sub>F<sub>3</sub>NO+Na 358.1395.



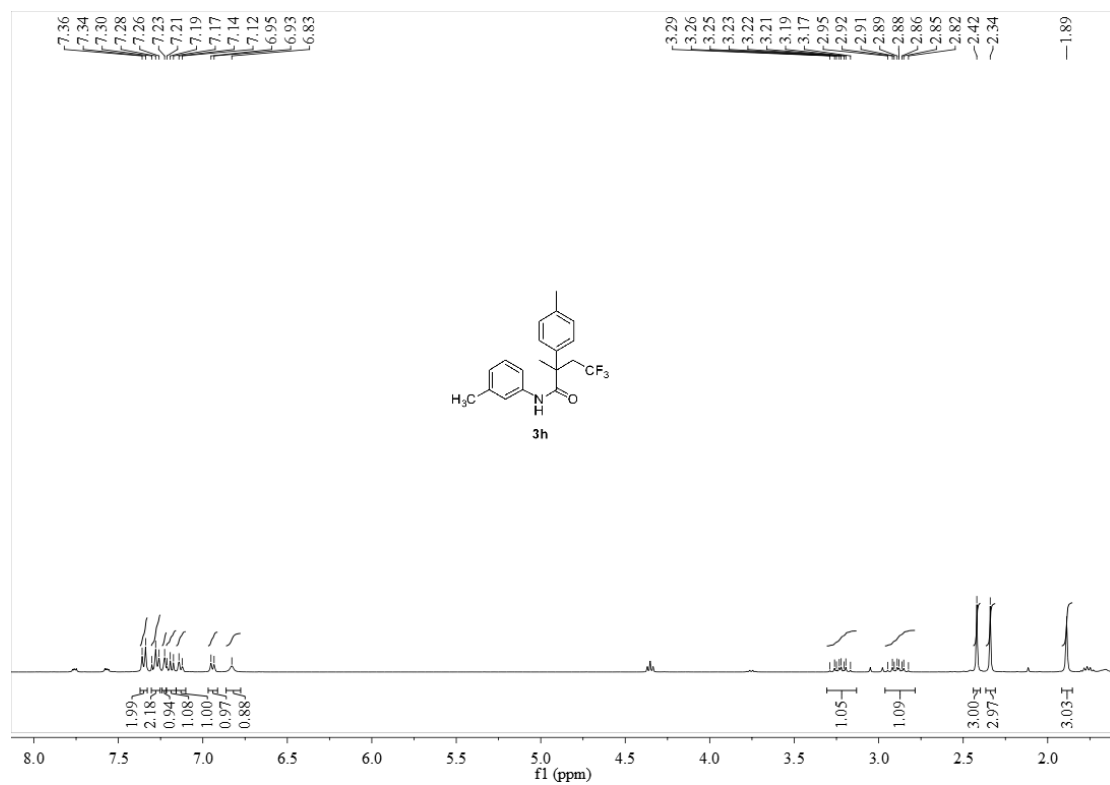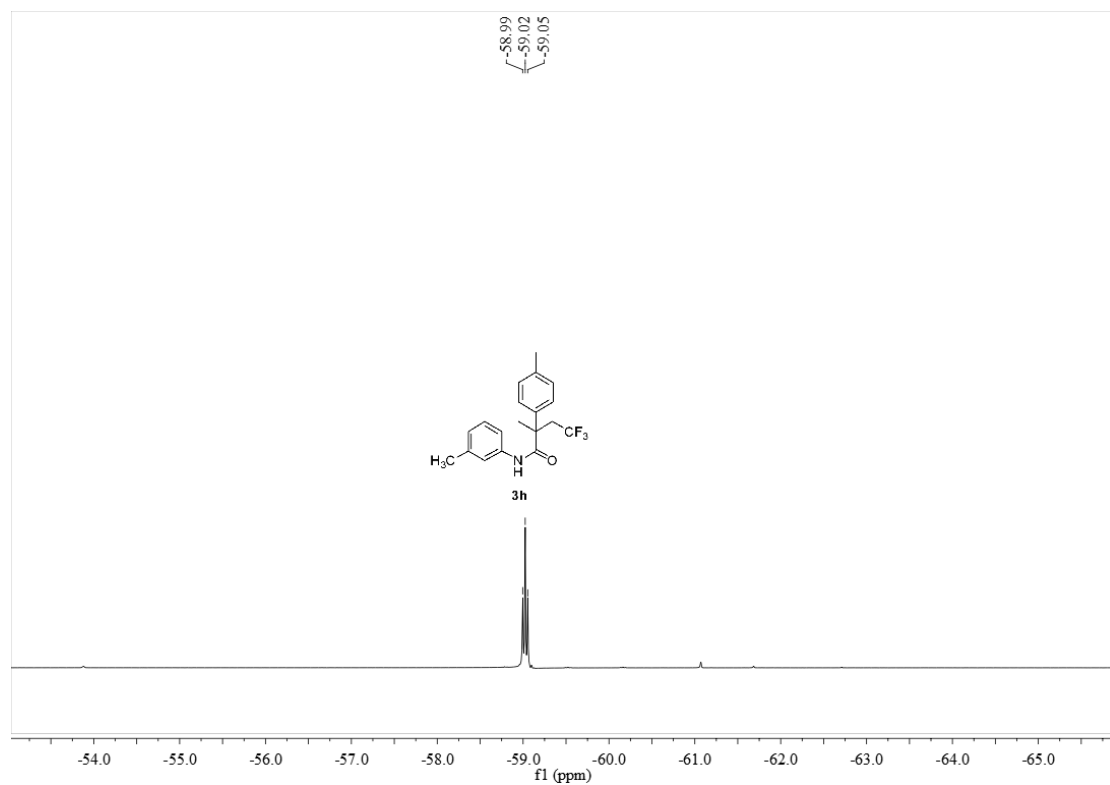

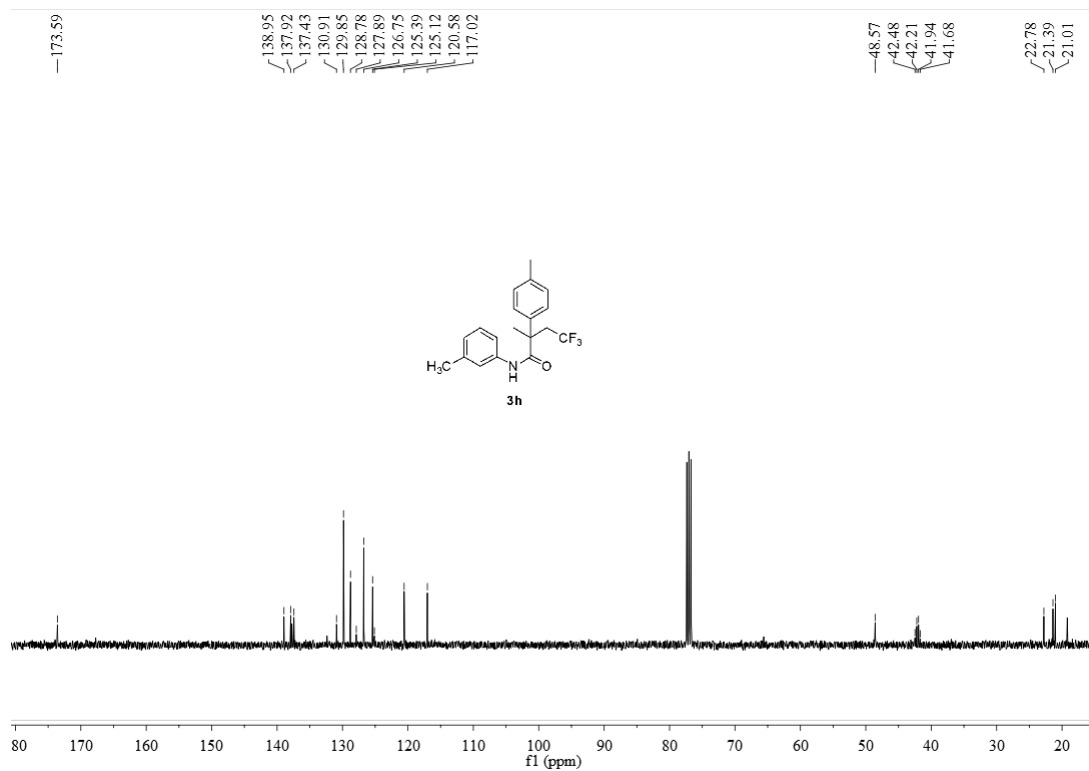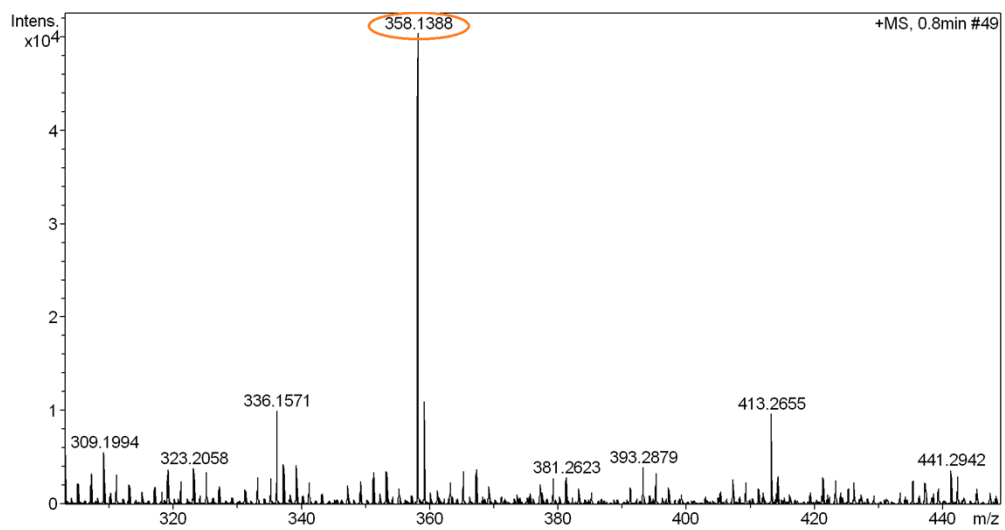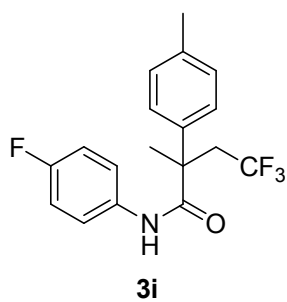

**4,4,4-trifluoro-N-(4-fluorophenyl)-2-methyl-2-(p-tolyl)butanamide (3i)**

**M:** 44.1 mg, **Yield:** 65%; **<sup>1</sup>H-NMR** (400 MHz, CDCl<sub>3</sub>) [ppm]  $\delta$  7.29 (ddd,  $J = 15.4, 11.4, 8.2$  Hz,

6H), 6.98 (t,  $J = 8.6$  Hz, 2H), 6.84 (s, 1H), 3.20 (dq,  $J = 15.5, 11.0$  Hz, 1H), 2.85 (dq,  $J = 15.5, 11.2$  Hz, 1H), 2.40 (s, 3H), 1.87 (s, 3H);  $^{19}\text{F-NMR}$  (376 MHz,  $\text{CDCl}_3$ ) [ppm]  $\delta$  -59.06 (t,  $J = 11.1$  Hz, 3F), -117.51 to -117.63 (m, F);  $^{13}\text{C-NMR}$  (100 MHz,  $\text{CDCl}_3$ ) [ppm]  $\delta$  173.7, 159.6 (d,  $^1J_{\text{CF}} = 243.0$  Hz), 138.0, 137.6, 134.4 (d,  $^4J_{\text{CF}} = 3.0$  Hz), 129.9, 126.7, 126.4 (q,  $J = 276.0$  Hz), 122.0 (d,  $^3J_{\text{CF}} = 8.0$  Hz), 115.6 (d,  $^2J_{\text{CF}} = 22.0$  Hz), 48.4 (d,  $J = 1.0$  Hz), 42.0 (q,  $J = 27.0$  Hz), 22.7, 21.0; **IR** (KBr)  $\nu$  ( $\text{cm}^{-1}$ ): 3317, 2925, 2857, 2362, 1662, 1612, 1513, 1405, 1367, 1306, 1261, 1216, 1156, 1124, 1080, 1042, 954, 829, 784, 666, 624, 515; **HRMS** (ESI) found:  $m/z$  362.1137  $[\text{M}+\text{Na}]^+$ ; calcd. for  $\text{C}_{18}\text{H}_{17}\text{F}_4\text{NO}+\text{Na}$  362.1144.

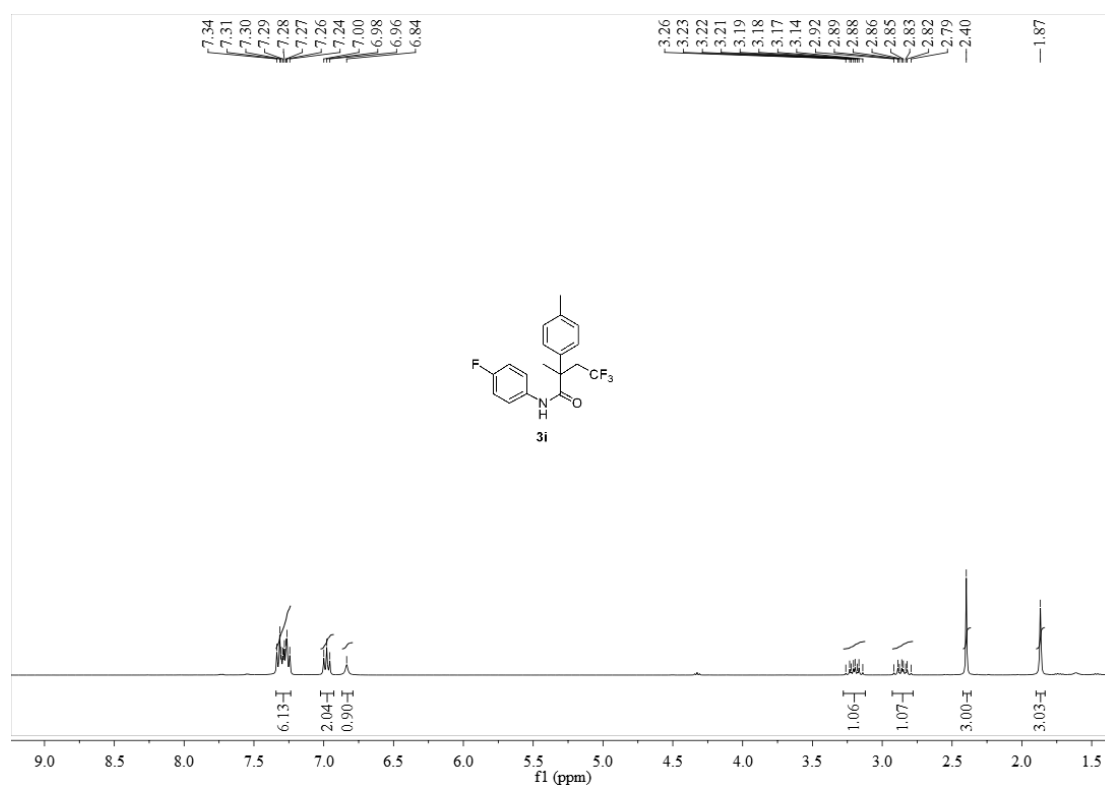

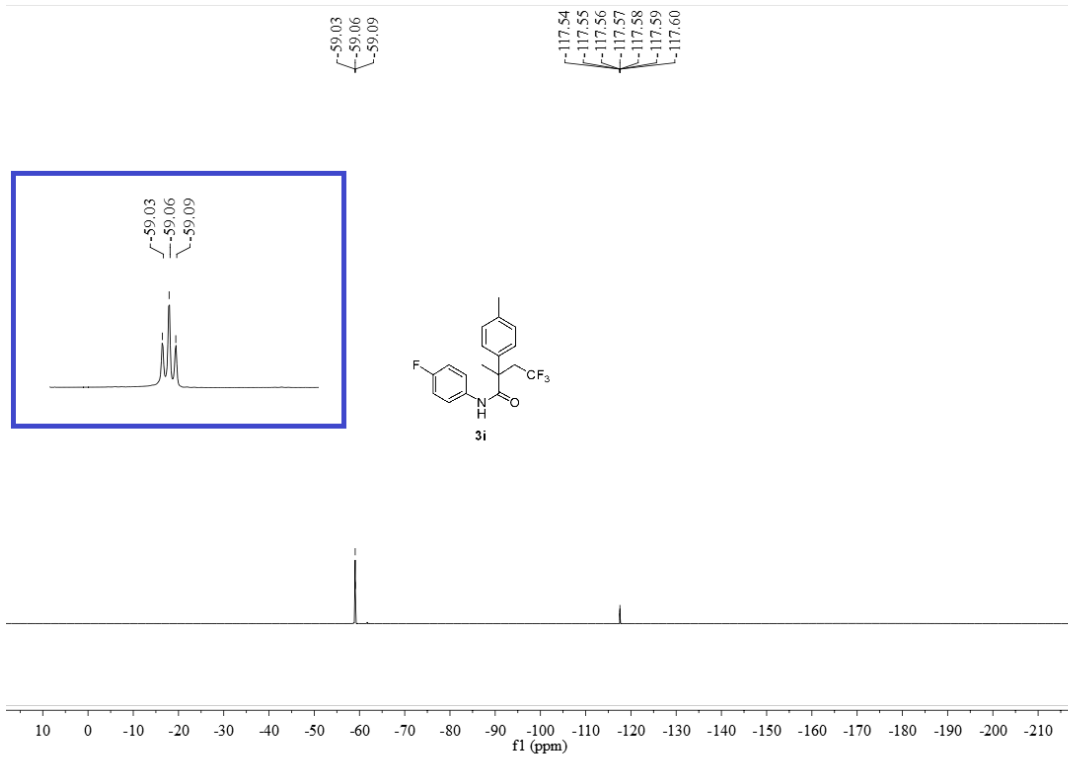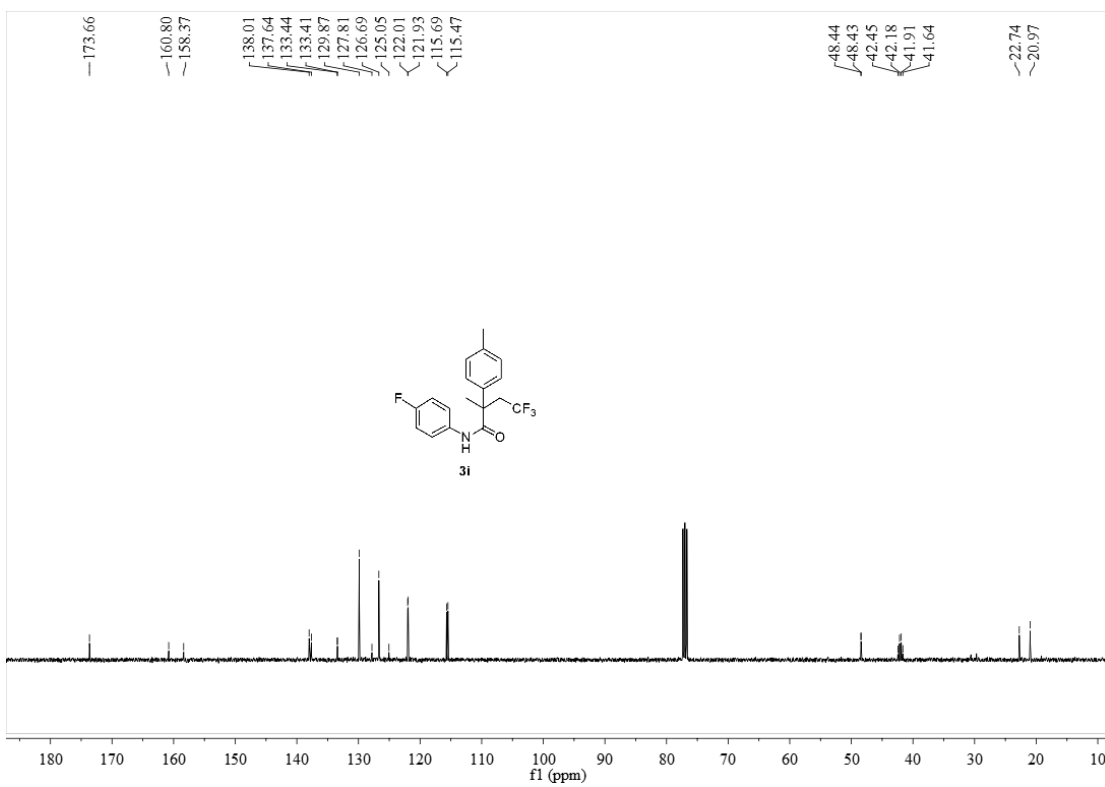

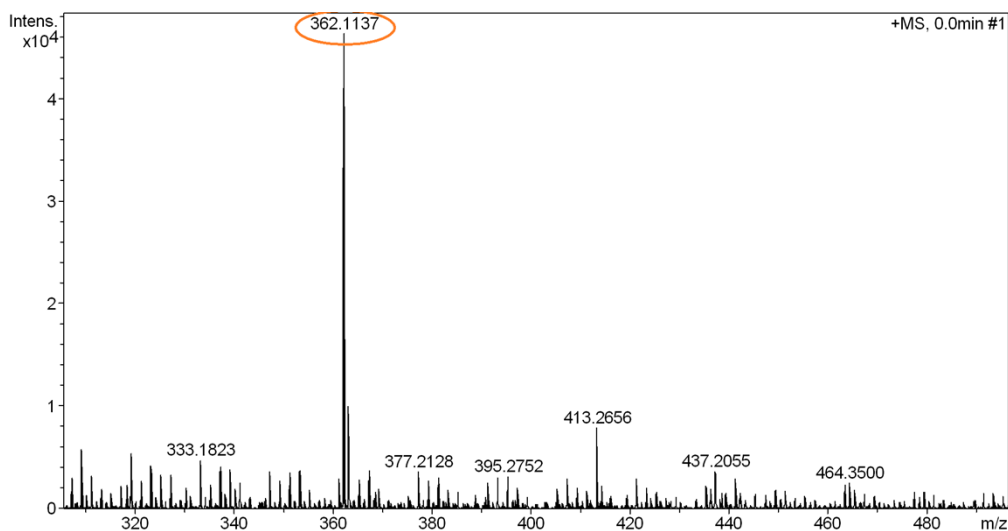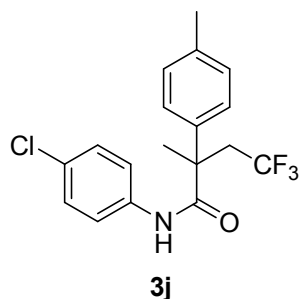

**N-(4-chlorophenyl)-4,4,4-trifluoro-2-methyl-2-(p-tolyl)butanamide (3j)**

**M:** 43.4 mg, **Yield:** 61%; **<sup>1</sup>H-NMR** (400 MHz, CDCl<sub>3</sub>) [ppm]  $\delta$  7.32 (d,  $J$  = 8.3 Hz, 3H), 7.28 (s, 1H), 7.27 – 7.22 (m, 4H), 6.84 (s, 1H), 3.19 (dq,  $J$  = 15.6, 11.0 Hz, 1H), 2.85 (dq,  $J$  = 15.6, 11.2 Hz, 1H), 2.40 (s, 3H), 1.86 (s, 3H); **<sup>19</sup>F-NMR** (376 MHz, CDCl<sub>3</sub>) [ppm]  $\delta$  –59.06 (t,  $J$  = 11.1 Hz, 3F); **<sup>13</sup>C-NMR** (100 MHz, CDCl<sub>3</sub>) [ppm]  $\delta$  173.6, 138.1, 137.5, 136.0, 129.9, 129.6, 128.9, 126.7, 126.4 (q,  $J$  = 276.0 Hz), 121.2, 48.6 (d,  $J$  = 1.0 Hz), 42.0 (q,  $J$  = 27.0 Hz), 22.7, 21.0; **IR** (KBr)  $\nu$  (cm<sup>-1</sup>): 3290, 2923, 2856, 2359, 1662, 1594, 1516, 1368, 1306, 1259, 1124, 1083, 1040, 954, 820, 756, 668, 604, 570; **HRMS** (ESI) found:  $m/z$  378.0849 [M+Na]<sup>+</sup>; calcd. for C<sub>18</sub>H<sub>17</sub>ClF<sub>3</sub>NO+Na 378.0849.

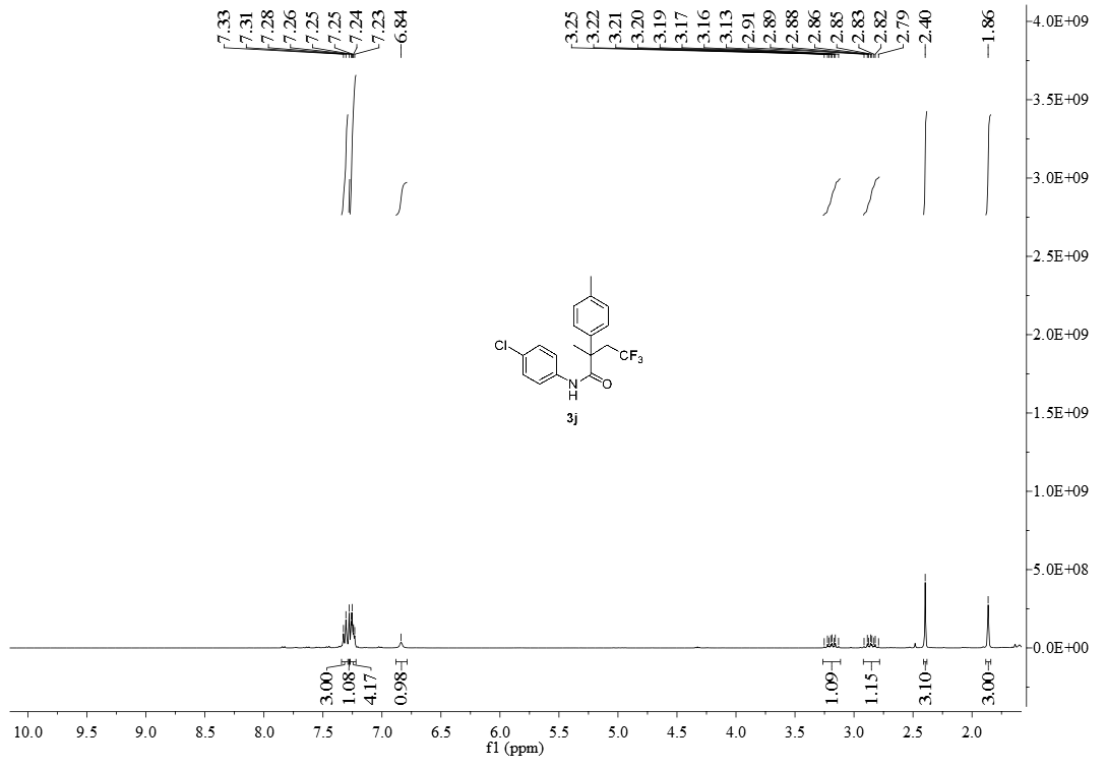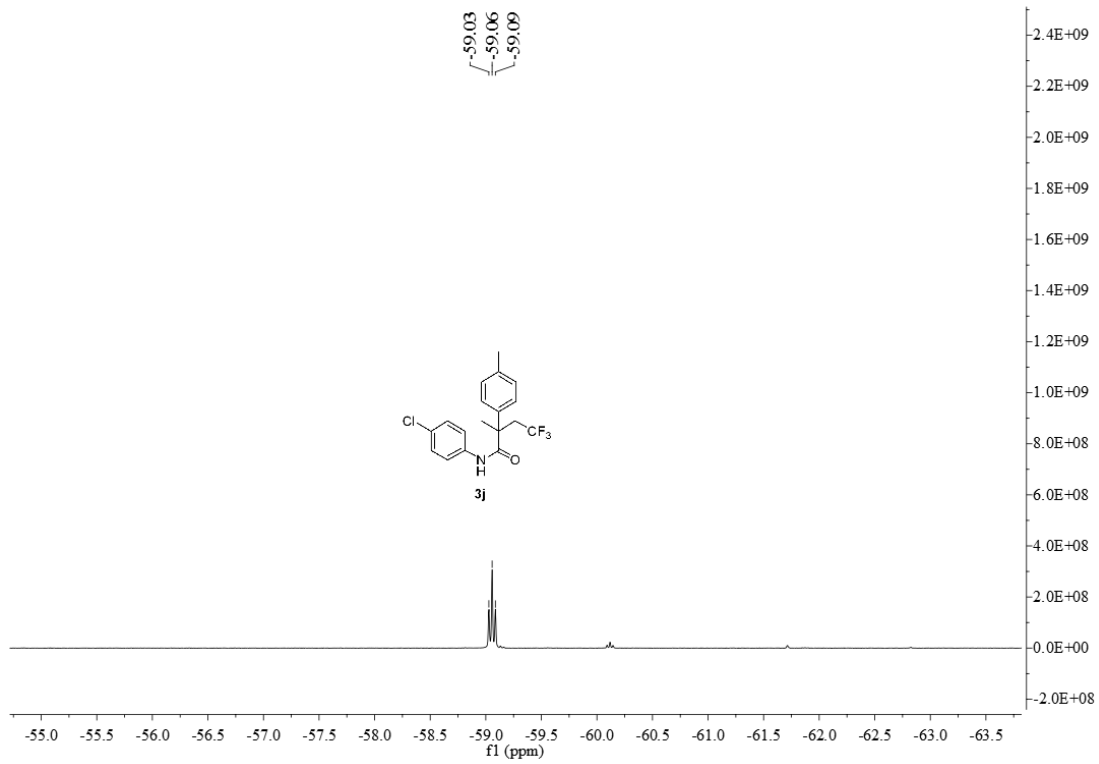

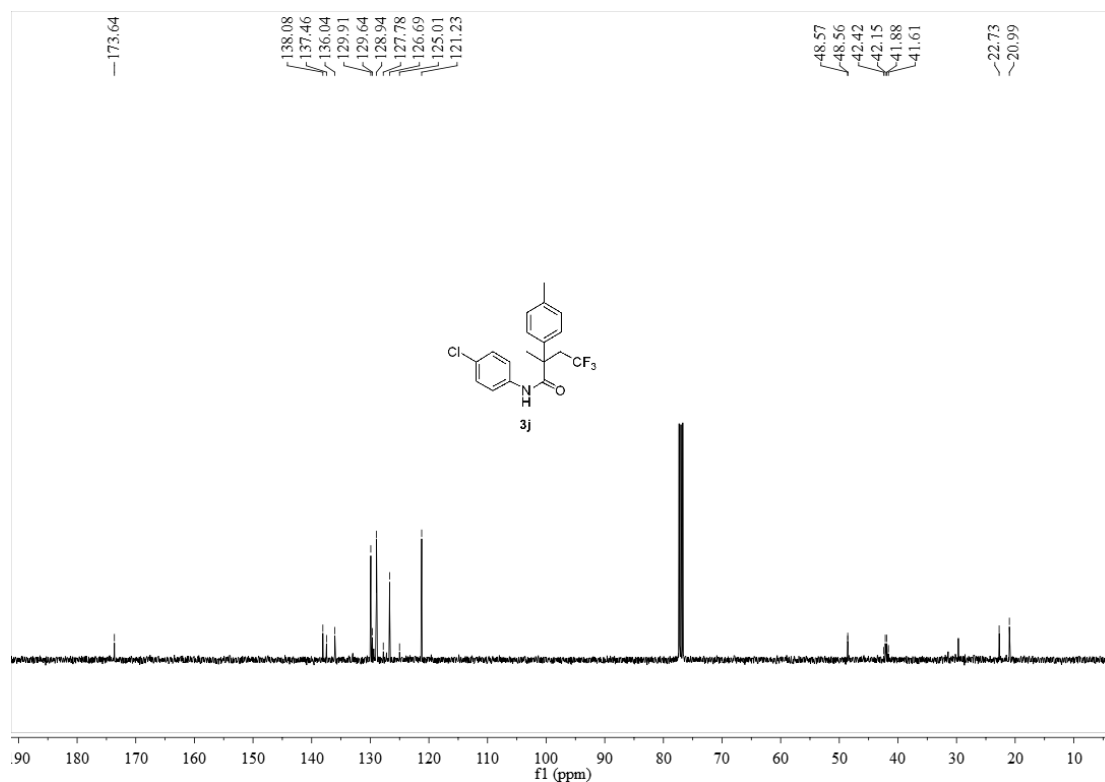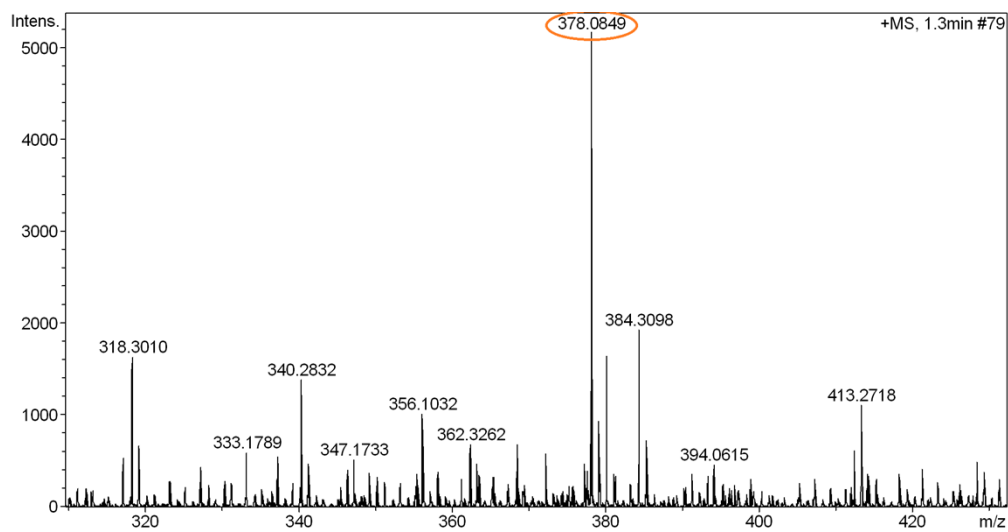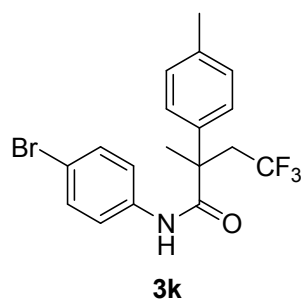

**N-(4-bromophenyl)-4,4,4-trifluoro-2-methyl-2-(p-tolyl)butanamide (3k)**

**M:** 49.6 mg, **Yield:** 62%; **<sup>1</sup>H-NMR** (400 MHz, CDCl<sub>3</sub>) [ppm]  $\delta$  7.39 (dd, *J* = 9.3, 2.3 Hz, 2H),

7.31 (d,  $J = 8.3$  Hz, 2H), 7.27–7.21 (m, 4H), 6.83 (s, 1H), 3.19 (dq,  $J = 15.6, 11.1$  Hz, 1H), 2.85 (dq,  $J = 15.6, 11.2$  Hz, 1H), 2.40 (s, 3H), 1.86 (s, 3H);  $^{19}\text{F-NMR}$  (376 MHz,  $\text{CDCl}_3$ ) [ppm]  $\delta$  – 59.05 (t,  $J = 11.1$  Hz, 3F);  $^{13}\text{C-NMR}$  (100 MHz,  $\text{CDCl}_3$ ) [ppm]  $\delta$  173.6, 138.1, 137.4, 136.6, 131.9, 129.9, 126.7, 126.4 (q,  $J = 276.0$  Hz), 121.5, 117.2, 48.6 (d,  $J = 2.0$  Hz), 42.0 (q,  $J = 28.0$  Hz), 22.7, 21.0; **IR** (KBr)  $\nu$  ( $\text{cm}^{-1}$ ): 3306, 2928, 2359, 1667, 1592, 1516, 1370, 1307, 1260, 1125, 1076, 1041, 951, 817, 752, 658, 590, 555; **HRMS** (ESI) found:  $m/z$  422.0335  $[\text{M}+\text{Na}]^+$ ; calcd. for  $\text{C}_{18}\text{H}_{17}\text{BrF}_3\text{NO}+\text{Na}$  422.0344.

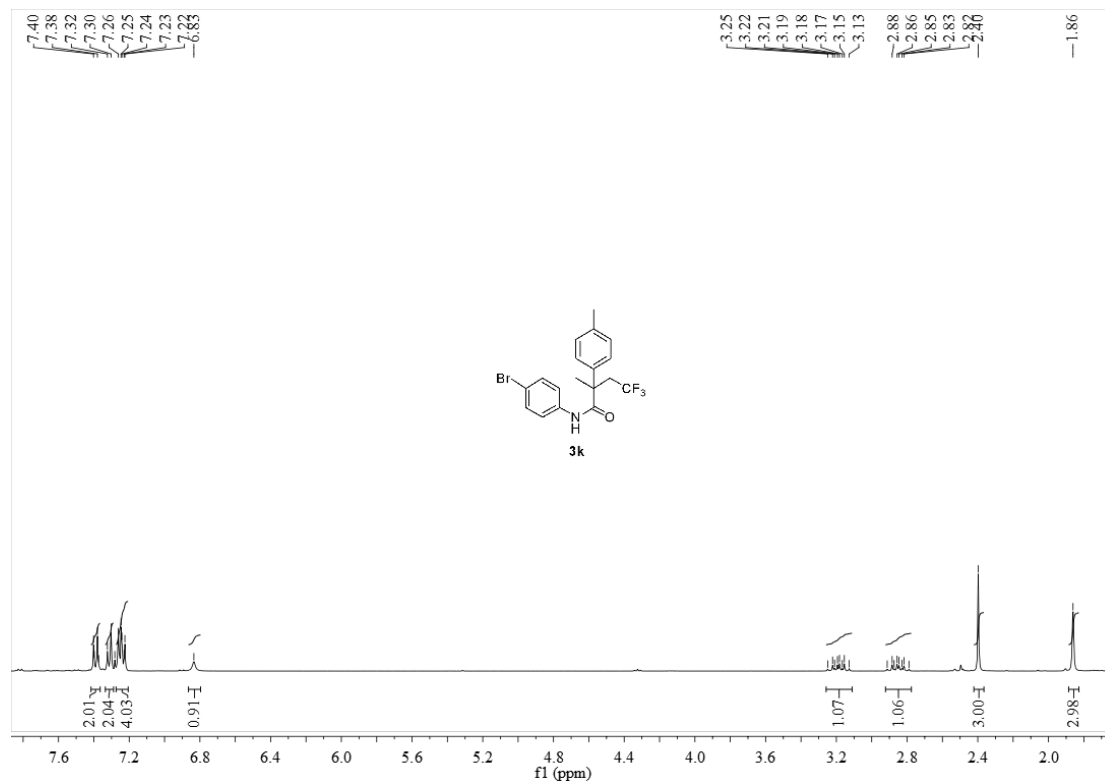



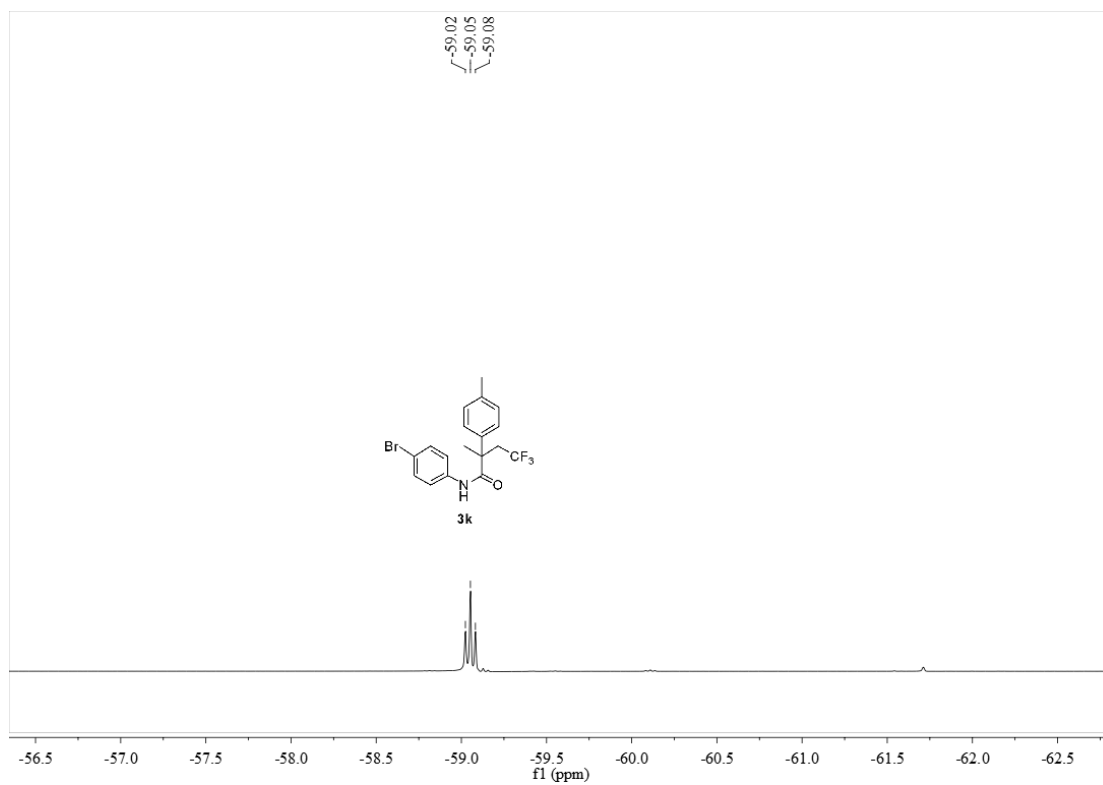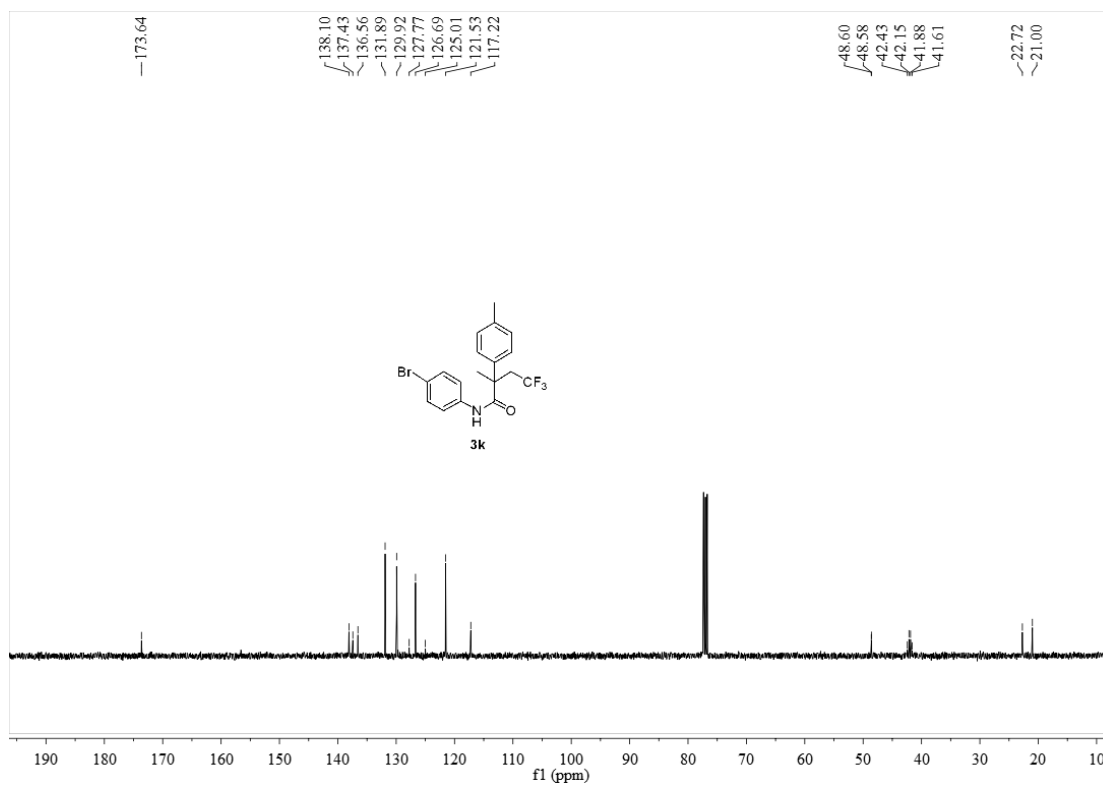

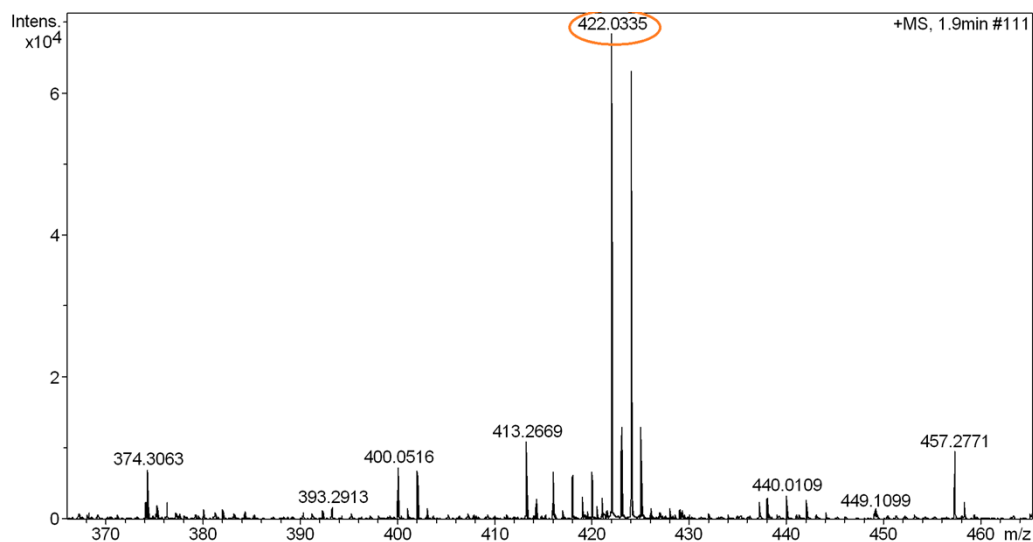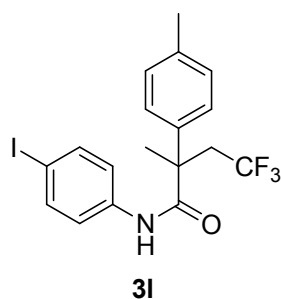

**4,4,4-trifluoro-N-(4-iodophenyl)-2-methyl-2-(p-tolyl)butanamide (3I)**

**M:** 40.2 mg, **Yield:** 45%; **<sup>1</sup>H-NMR** (400 MHz, CDCl<sub>3</sub>) [ppm]  $\delta$  7.60 (d,  $J$  = 8.8 Hz, 2H), 7.33 (d,  $J$  = 8.3 Hz, 2H), 7.27 (d,  $J$  = 8.1 Hz, 2H), 7.15 (d,  $J$  = 8.8 Hz, 2H), 6.84 (s, 1H), 3.20 (dq,  $J$  = 15.6, 11.0 Hz, 1H), 2.87 (dq,  $J$  = 15.6, 11.2 Hz, 1H), 2.42 (s, 3H), 1.88 (s, 3H); **<sup>19</sup>F-NMR** (376 MHz, CDCl<sub>3</sub>) [ppm]  $\delta$  -59.06 (t,  $J$  = 11.1 Hz, 3F); **<sup>13</sup>C-NMR** (100 MHz, CDCl<sub>3</sub>) [ppm]  $\delta$  173.6, 138.1, 137.4, 137.3, 130.9, 129.9, 127.9, 126.7, 126.4 (q,  $J$  = 276.0 Hz), 121.8, 48.6 (d,  $J$  = 2.0 Hz), 42.0 (q,  $J$  = 26.5 Hz), 22.7, 21.0; **IR** (KBr)  $\nu$  (cm<sup>-1</sup>): 3310, 2958, 2871, 2360, 1723, 1685, 1588, 1514, 1366, 1268, 1126, 1075, 951, 817, 747, 664; **HRMS** (ESI) found:  $m/z$  470.0211 [M+Na]<sup>+</sup>; calcd. for C<sub>18</sub>H<sub>17</sub>IF<sub>3</sub>NO+Na 470.0205.

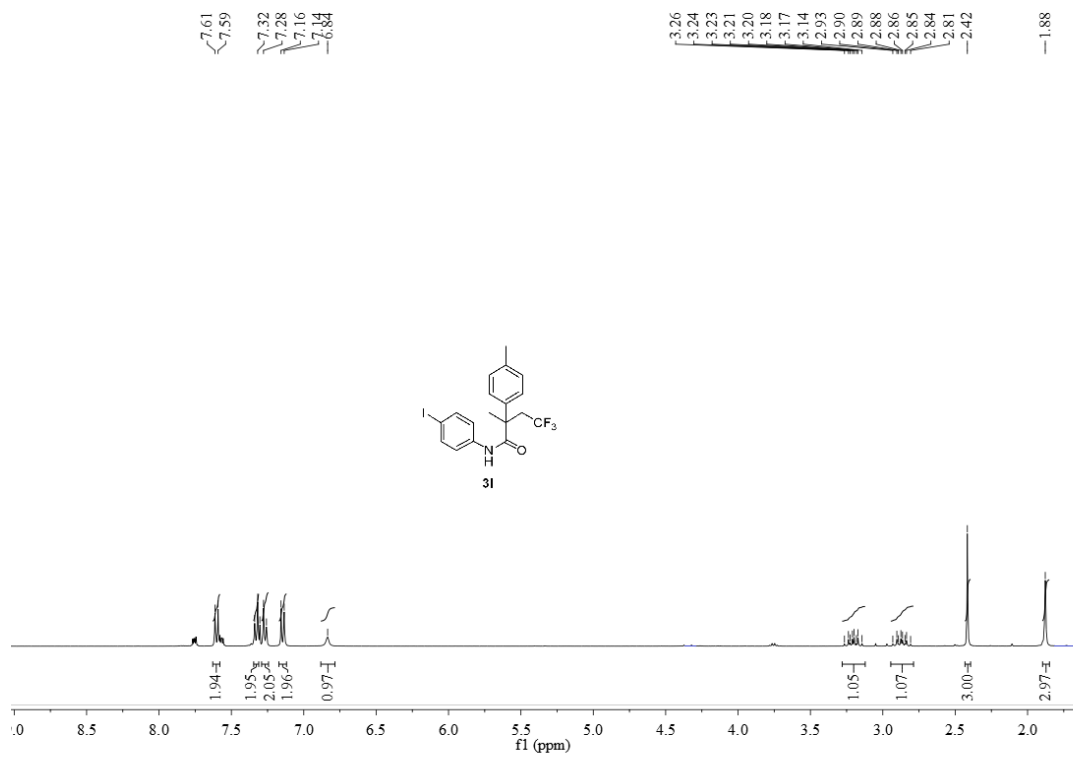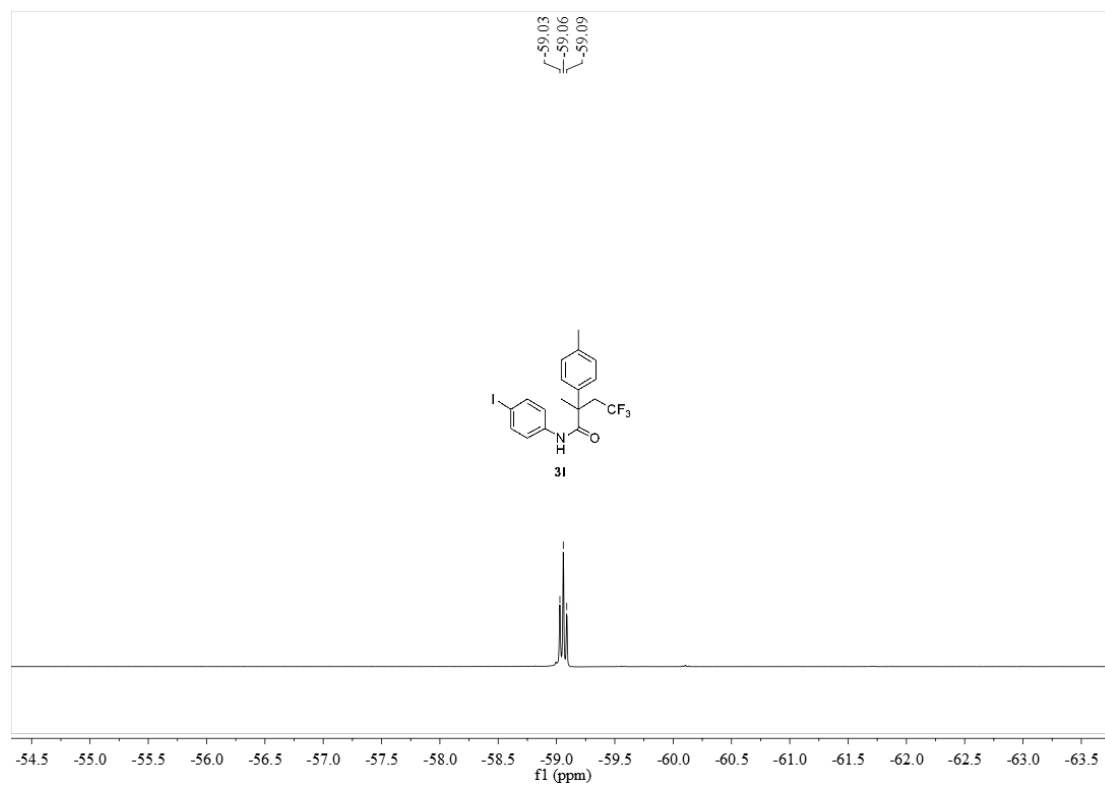

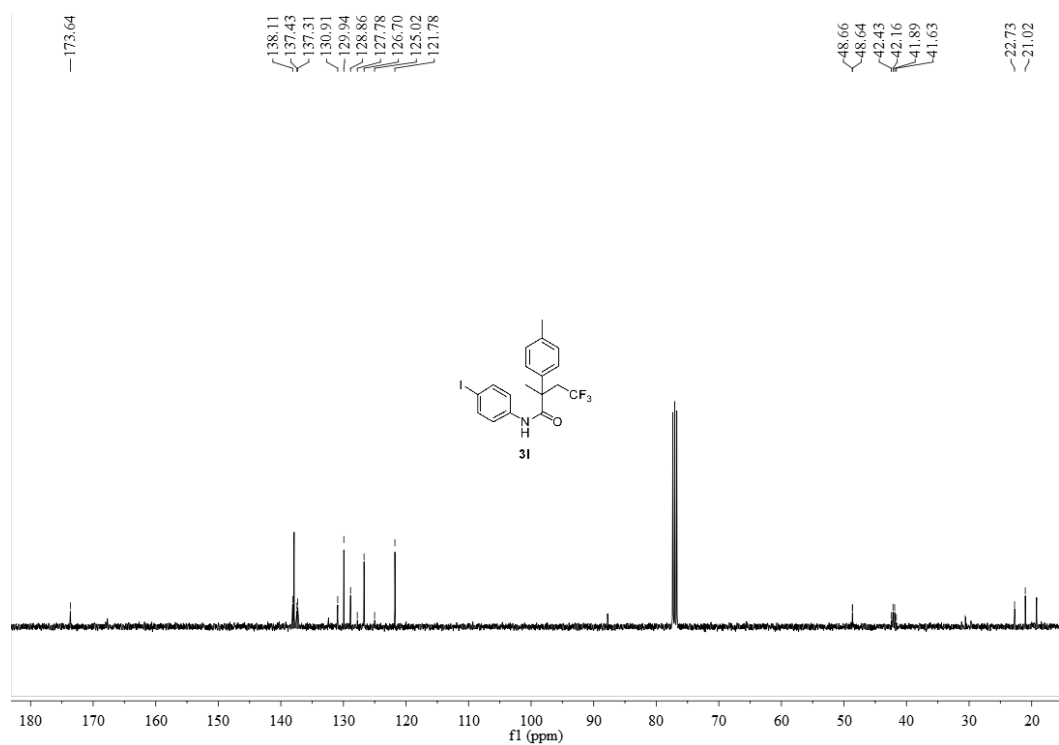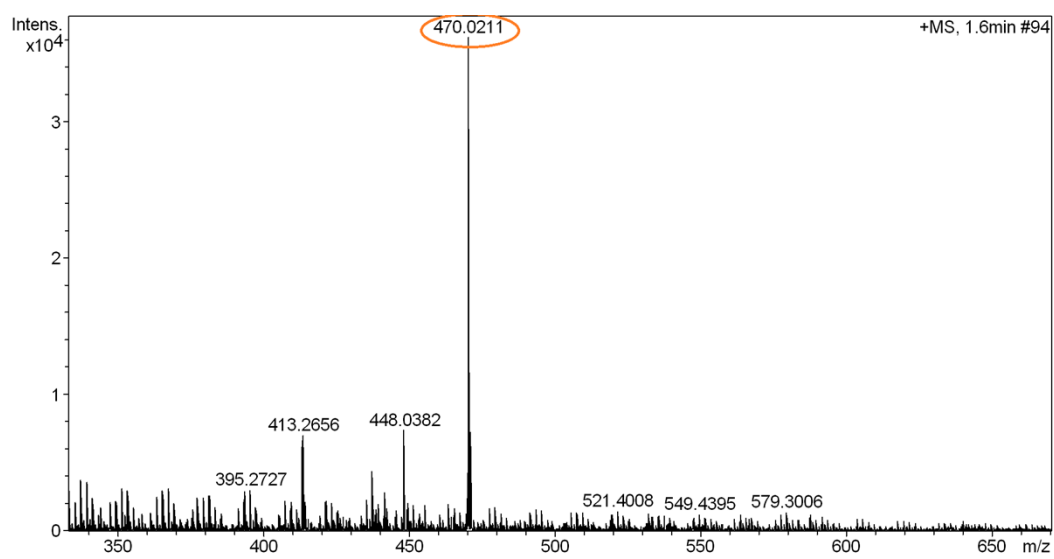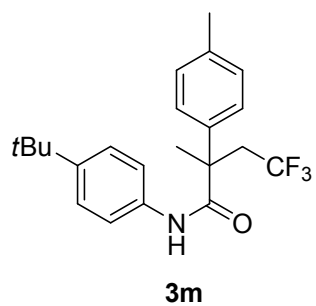

**N-(4-(tert-butyl)phenyl)-4,4,4-trifluoro-2-methyl-2-(p-tolyl)butanamide (3m)**

**M:** 43.0 mg, **Yield:** 57%; <sup>1</sup>H-NMR (400 MHz, CDCl<sub>3</sub>) [ppm] δ 7.32 (dd, *J* = 8.5, 4.3 Hz, 4H),

7.28 (s, 2H), 7.24 (d,  $J = 8.2$  Hz, 2H), 6.79 (s, 1H), 3.21 (dq,  $J = 15.6, 11.1$  Hz, 1H), 2.87 (dq,  $J = 15.6, 11.2$  Hz, 1H), 2.40 (s, 3H), 1.86 (s, 3H), 1.30 (s, 9H);  $^{19}\text{F-NMR}$  (376 MHz,  $\text{CDCl}_3$ ) [ppm]  $\delta$  -59.04 (t,  $J = 11.1$  Hz, 3F);  $^{13}\text{C-NMR}$  (100 MHz,  $\text{CDCl}_3$ ) [ppm]  $\delta$  173.5, 147.6, 137.9, 137.8, 134.9, 129.8, 126.7, 126.5 (q,  $J = 276.0$  Hz), 125.8, 119.7, 48.5 (d,  $J = 1.0$  Hz), 42.1 (q,  $J = 26.5$  Hz), 34.4, 31.3, 22.8, 21.0; **IR** (KBr)  $\nu$  ( $\text{cm}^{-1}$ ): 3306, 2960, 2868, 2362, 2336, 1664, 1595, 1520, 1404, 1365, 1317, 1261, 1120, 1080, 1040, 952, 822, 668, 614, 555; **HRMS** (ESI) found:  $m/z$  400.1859  $[\text{M}+\text{Na}]^+$ ; calcd. for  $\text{C}_{22}\text{H}_{26}\text{F}_3\text{NO}+\text{Na}$  400.1864.

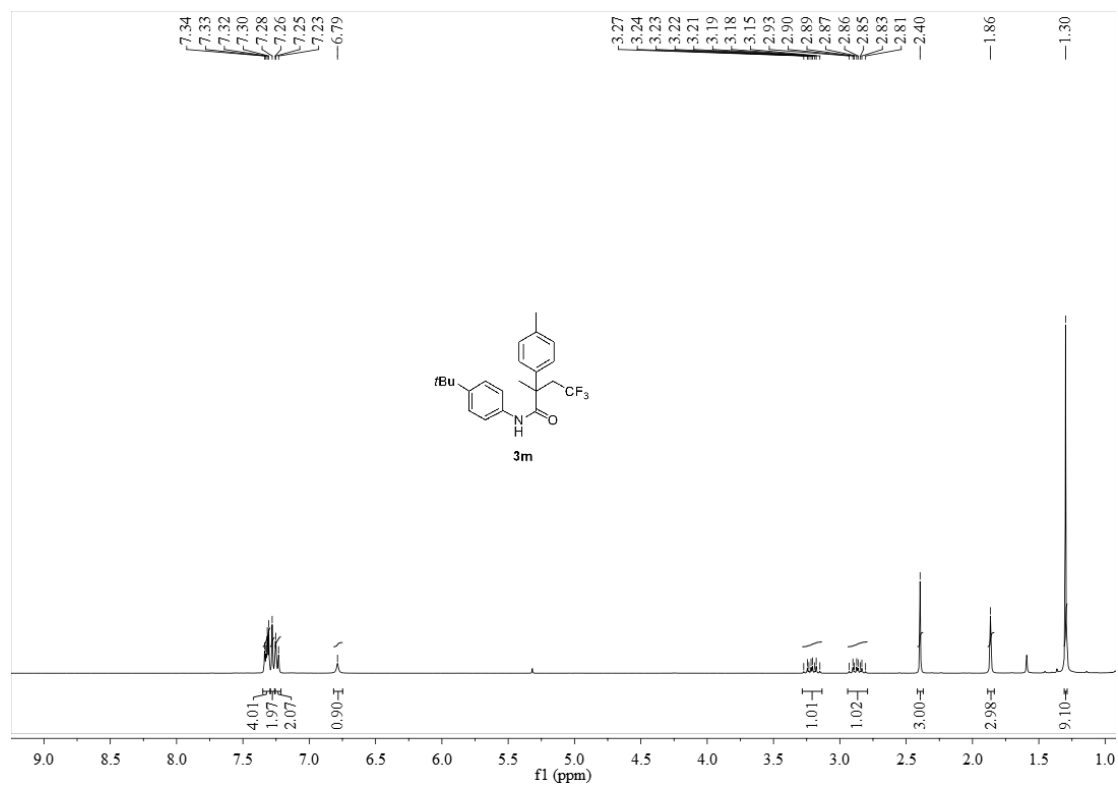

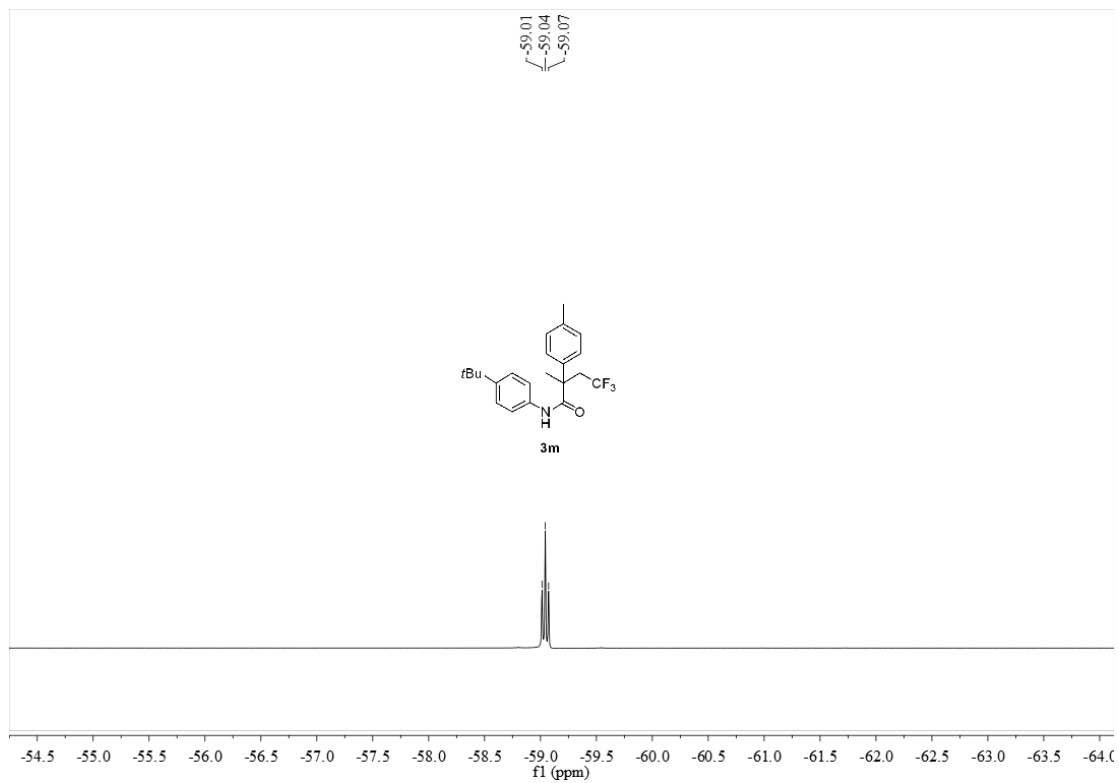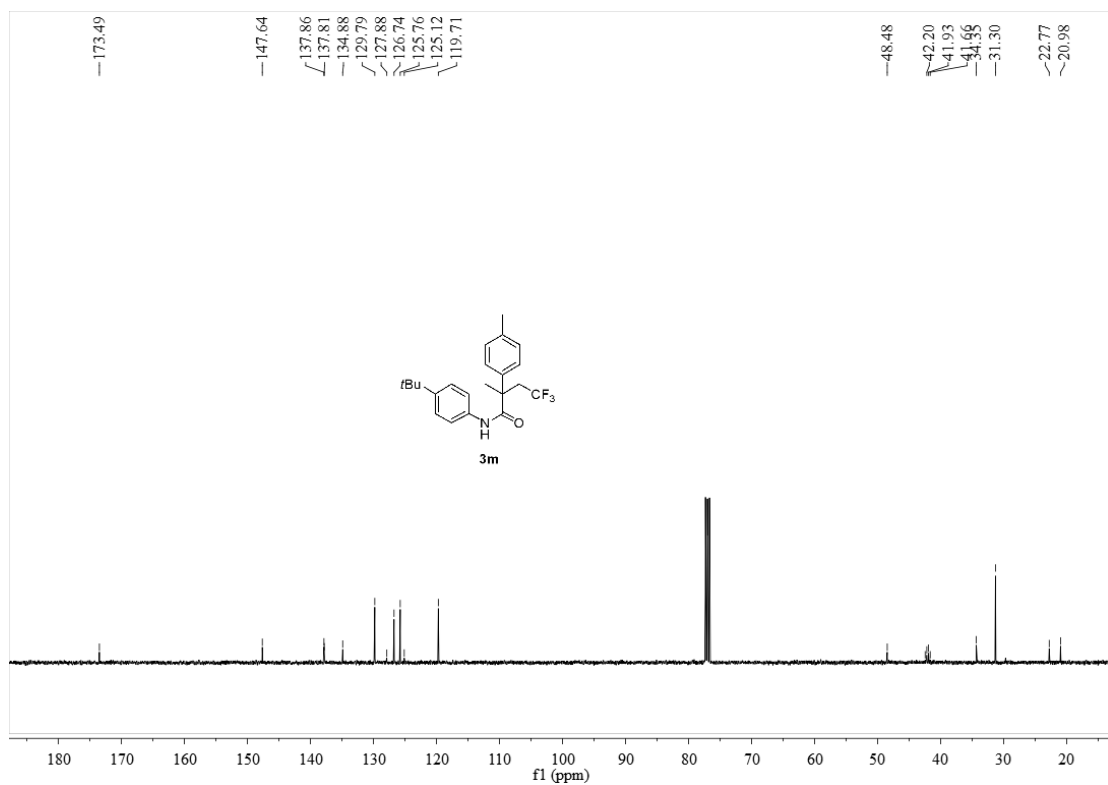

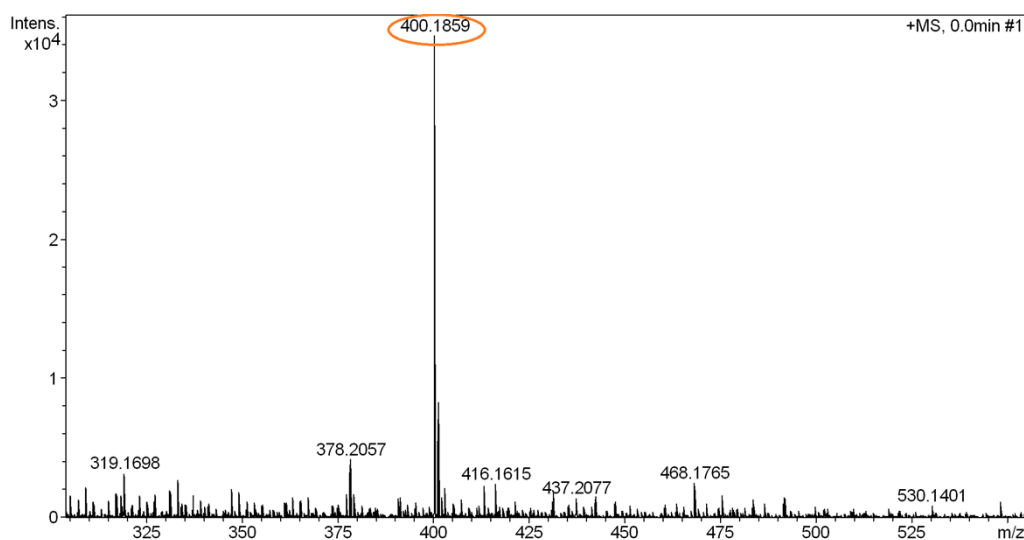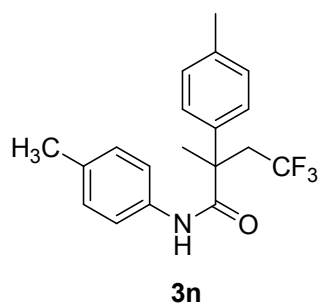

**4,4,4-trifluoro-2-methyl-N,2-di-p-tolylbutanamide (3n)**

**M:** 42.3 mg, **Yield:** 63%; **<sup>1</sup>H-NMR** (400 MHz, CDCl<sub>3</sub>) [ppm] δ 7.33 (d, *J* = 8.2 Hz, 2H), 7.23 (dd, *J* = 10.9, 8.3 Hz, 4H), 7.09 (d, *J* = 8.3 Hz, 2H), 6.77 (s, 1H), 3.21 (dq, *J* = 15.6, 11.1 Hz, 1H), 2.86 (dq, *J* = 15.6, 11.3 Hz, 1H), 2.40 (s, 3H), 2.31 (s, 3H), 1.87 (s, 3H); **<sup>19</sup>F-NMR** (376 MHz, CDCl<sub>3</sub>) [ppm] δ -59.04 (t, *J* = 11.1 Hz, 3F); **<sup>13</sup>C-NMR** (100 MHz, CDCl<sub>3</sub>) [ppm] δ 173.5, 137.9, 137.8, 134.9, 134.3, 129.8, 129.4, 126.8, 126.5 (q, *J* = 277.0 Hz), 120.0, 48.5 (d, *J* = 1.0 Hz), 42.1 (q, *J* = 26.5 Hz), 27.8 (d, *J* = 1.0 Hz), 21.0, 20.8; **IR** (KBr) ν (cm<sup>-1</sup>): 3334, 2928, 2870, 2360, 1668, 1599, 1520, 1462, 1367, 1308, 1260, 1124, 1079, 1040, 950, 813, 623, 513; **HRMS** (ESI) found: *m/z* 358.1401 [M+Na]<sup>+</sup>; calcd. for C<sub>19</sub>H<sub>20</sub>F<sub>3</sub>NO+Na 358.1395.

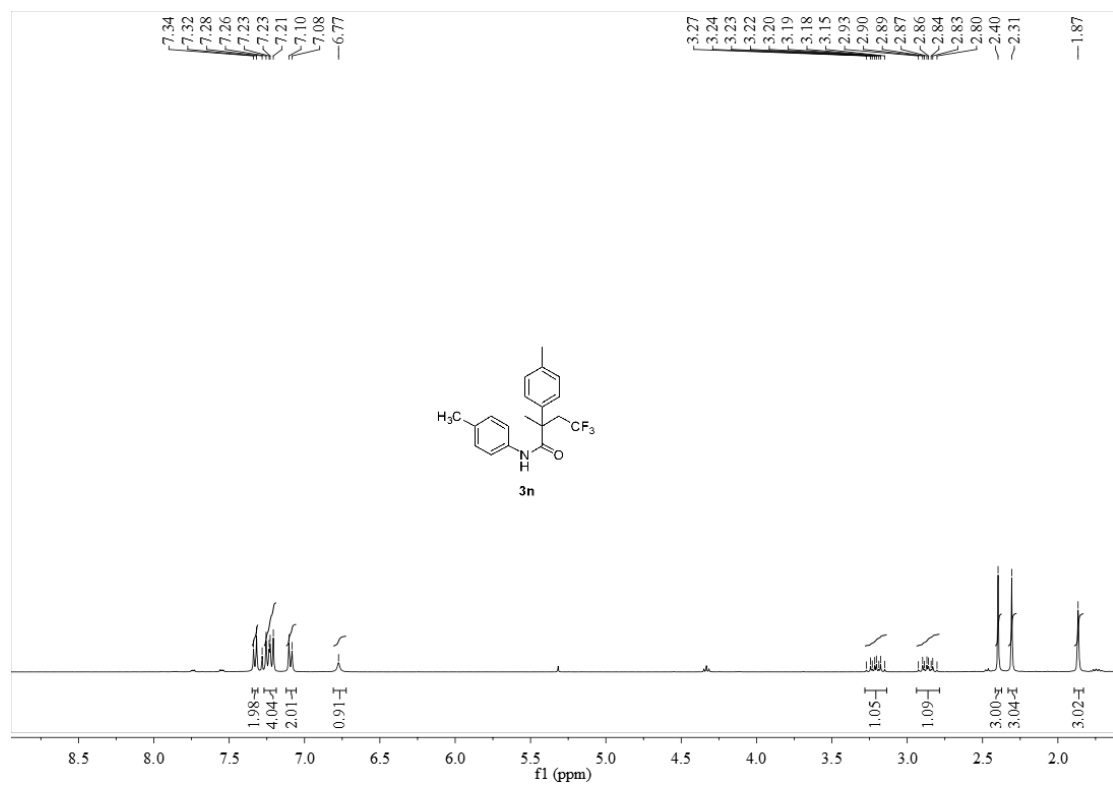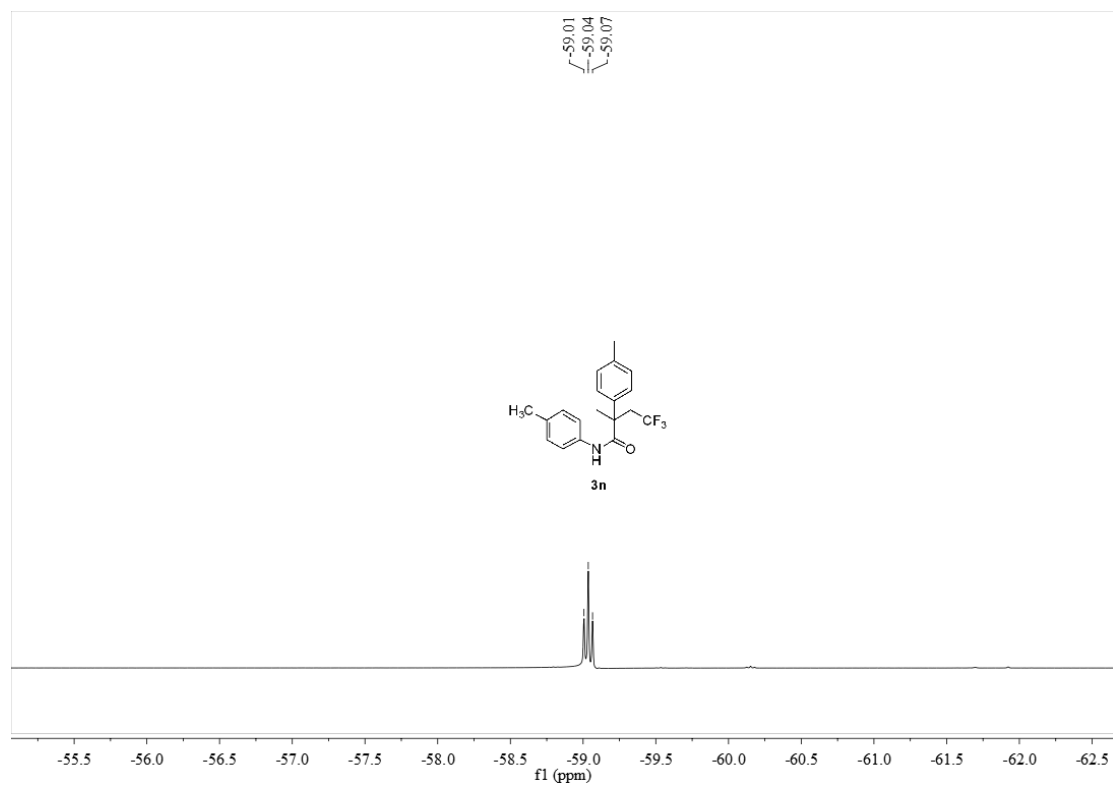



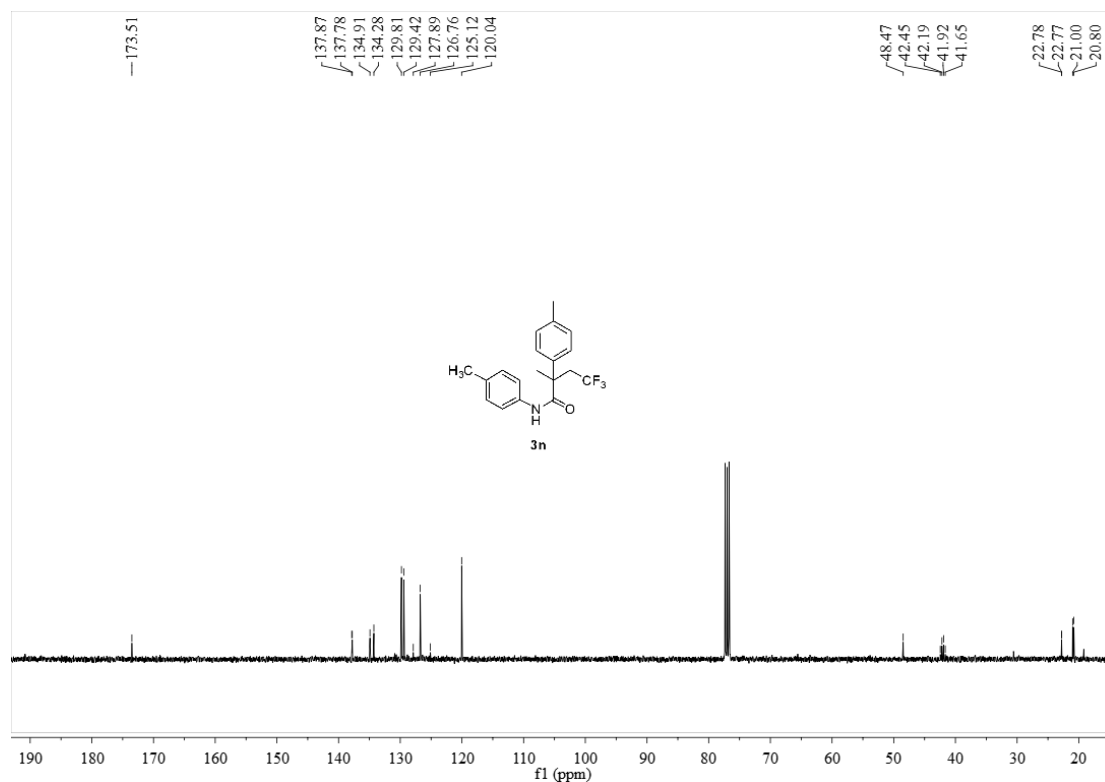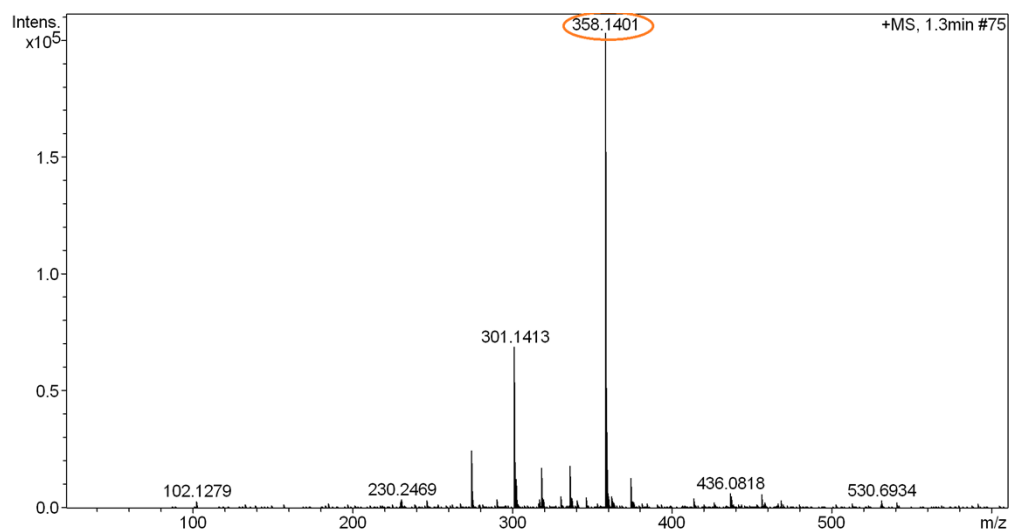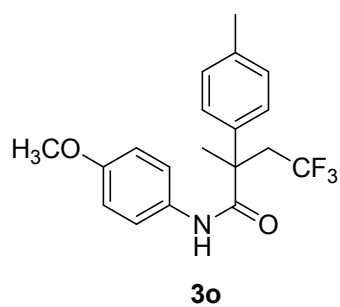

**4,4,4-trifluoro-N-(4-methoxyphenyl)-2-methyl-2-(p-tolyl)butanamide (3o)**

**M:** 41.5 mg, **Yield:** 59%; **<sup>1</sup>H-NMR** (400 MHz, CDCl<sub>3</sub>) [ppm] δ 7.33 (d, *J* = 8.3 Hz, 2H), 7.27–

7.20 (m, 4H), 6.85–6.79 (m, 2H), 6.74 (s, 1H), 3.78 (s, 3H), 3.21 (dq,  $J = 15.6, 11.1$  Hz, 1H), 2.86 (dq,  $J = 15.6, 11.2$  Hz, 1H), 2.39 (s, 3H), 1.86 (s, 3H);  $^{19}\text{F-NMR}$  (376 MHz,  $\text{CDCl}_3$ ) [ppm]  $\delta$  – 59.04 (t,  $J = 11.2$  Hz, 3F);  $^{13}\text{C-NMR}$  (100 MHz,  $\text{CDCl}_3$ ) [ppm]  $\delta$  173.6, 156.7, 137.9, 137.8, 130.5, 129.8, 126.8, 126.5 (q,  $J = 276.0$  Hz), 122.0, 114.1, 55.5, 48.3 (d,  $J = 2.0$  Hz), 42.1 (q,  $J = 26.5$  Hz), 22.8 (d,  $J = 1.0$  Hz), 21.0; **IR** (KBr)  $\nu$  ( $\text{cm}^{-1}$ ): 3332, 2924, 2853, 2359, 1664, 1604, 1517, 1464, 1411, 1368, 1305, 1251, 1123, 1080, 957, 824, 534; **HRMS** (ESI) found:  $m/z$  374.1353  $[\text{M}+\text{Na}]^+$ ; calcd. for  $\text{C}_{19}\text{H}_{20}\text{F}_3\text{NO}_2+\text{Na}$  374.1344.

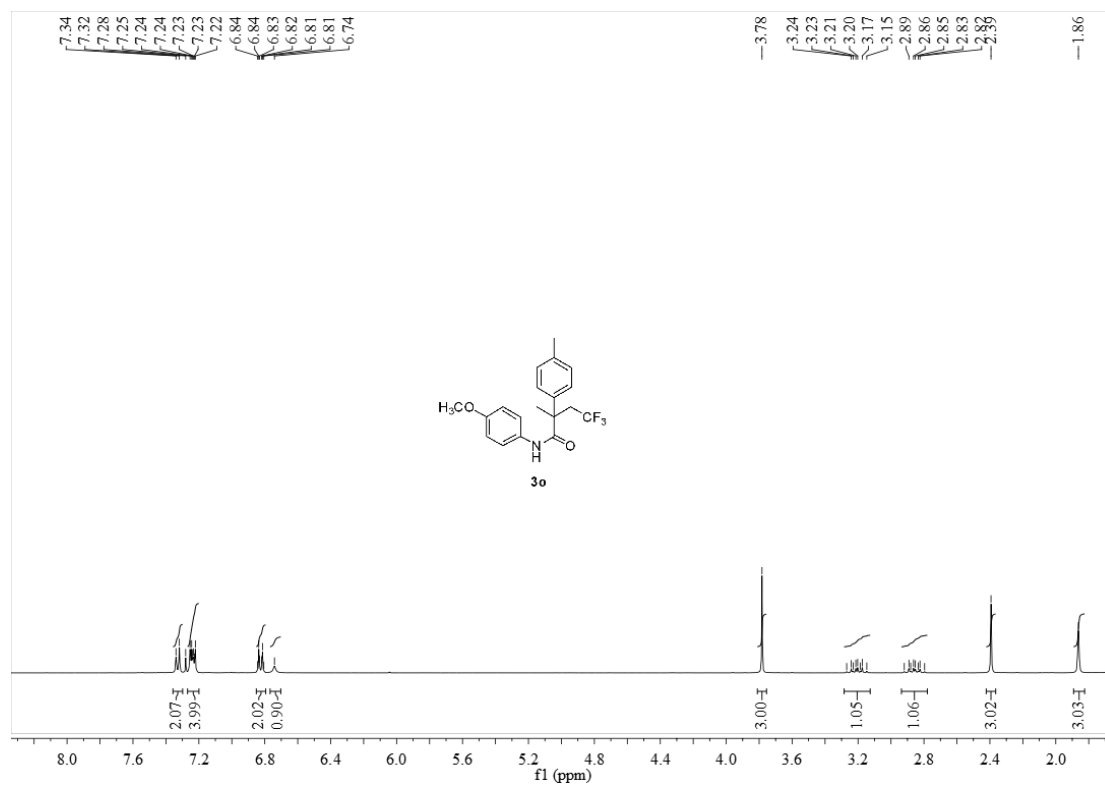

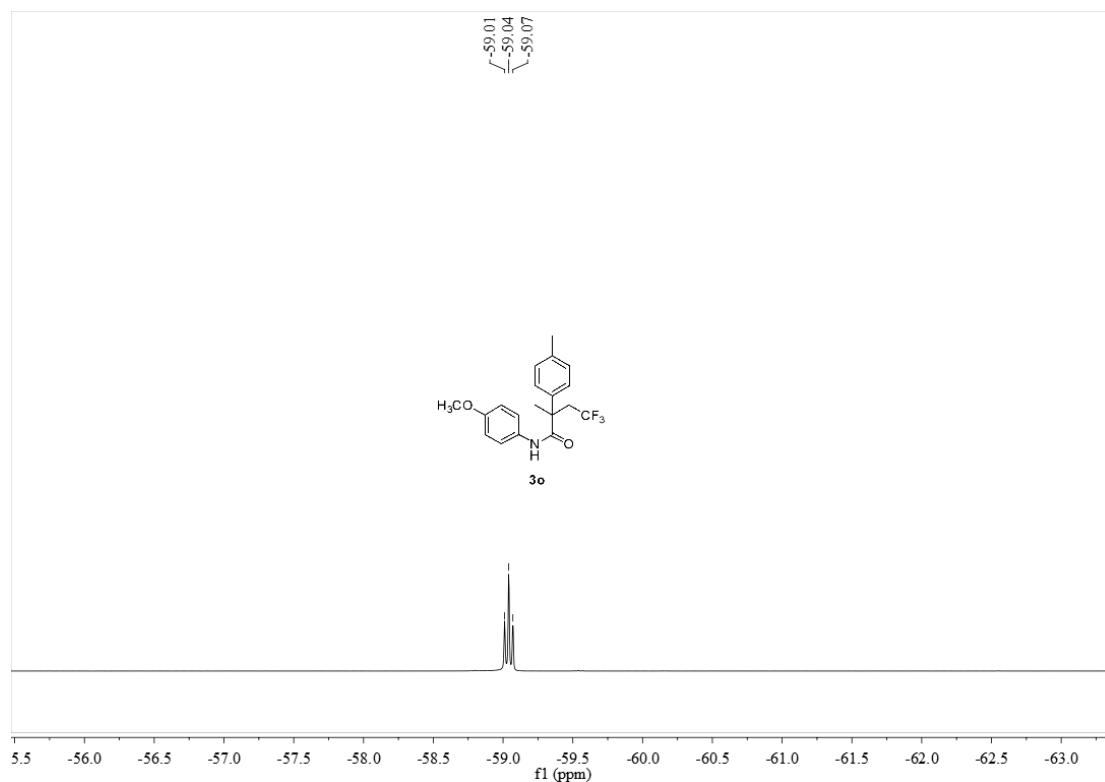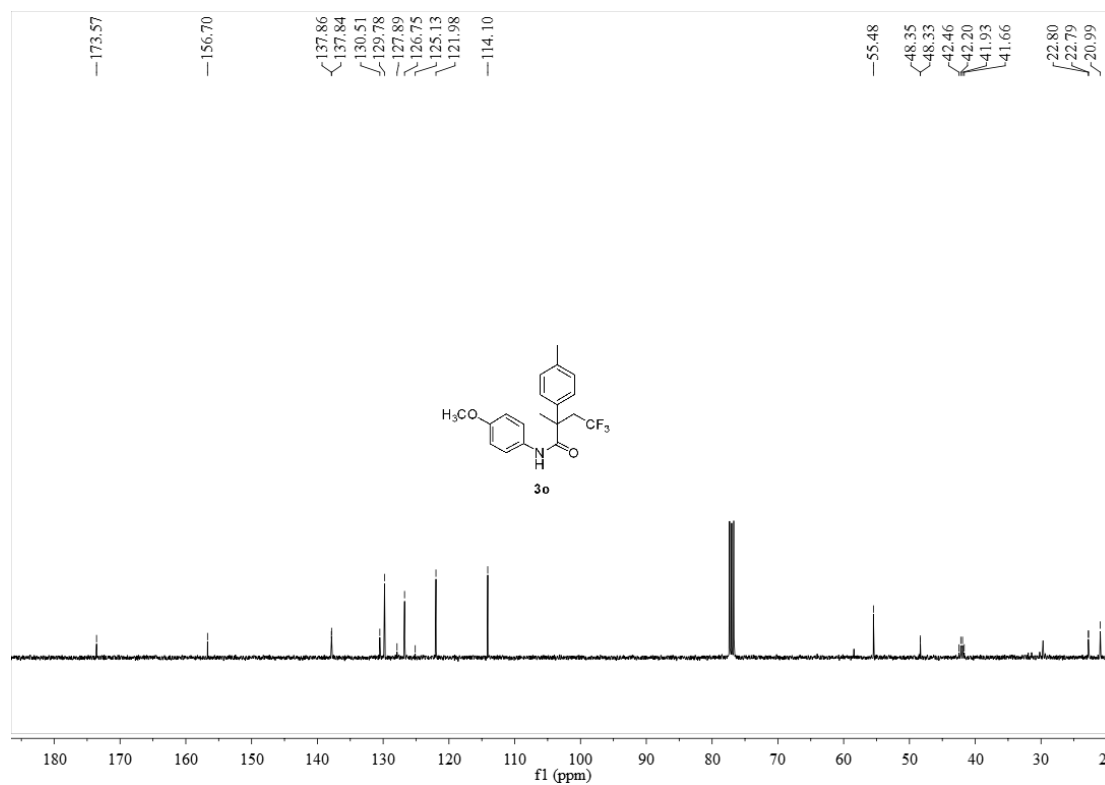

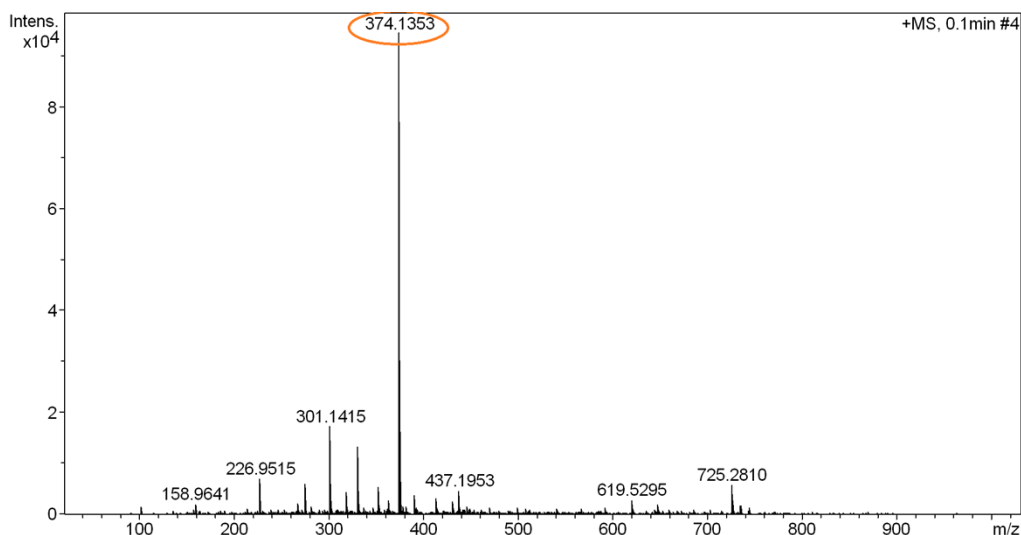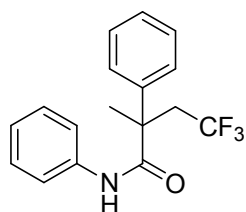

**3p**

**4,4,4-trifluoro-2-methyl-N,2-diphenylbutanamide (3p)**

**M:** 33.2 mg, **Yield:** 54%; **<sup>1</sup>H-NMR** (400 MHz, CDCl<sub>3</sub>) [ppm]  $\delta$  7.46 (d,  $J$  = 4.2 Hz, 4H), 7.39 (dq,  $J$  = 8.7, 4.4 Hz, 1H), 7.31 (qd,  $J$  = 8.6, 1.8 Hz, 4H), 7.11 (dd,  $J$  = 9.8, 4.3 Hz, 1H), 6.80 (s, 1H), 3.23 (dq,  $J$  = 15.7, 11.0 Hz, 1H), 2.89 (dq,  $J$  = 15.6, 11.2 Hz, 1H), 1.90 (s, 3H), 1.90 (s, 3H); **<sup>19</sup>F-NMR** (376 MHz, CDCl<sub>3</sub>) [ppm]  $\delta$  -59.06 (t,  $J$  = 11.1 Hz, 3F); **<sup>13</sup>C-NMR** (100 MHz, CDCl<sub>3</sub>) [ppm]  $\delta$  173.3, 140.8, 137.4, 129.2, 129.0, 128.1, 126.8, 126.4 (q,  $J$  = 277.0 Hz), 124.6, 120.0, 48.9 (d,  $J$  = 1.0 Hz), 42.1 (q,  $J$  = 27.0 Hz), 22.6; **IR** (KBr)  $\nu$  (cm<sup>-1</sup>): 3319, 3058, 2955, 2359, 1666, 1598, 1526, 1440, 1368, 1313, 1259, 1125, 1040, 948, 749, 695, 642, 544; **HRMS** (ESI) found:  $m/z$  330.1086 [M+Na]<sup>+</sup>; calcd. for C<sub>17</sub>H<sub>16</sub>F<sub>3</sub>NO+Na 330.1082.

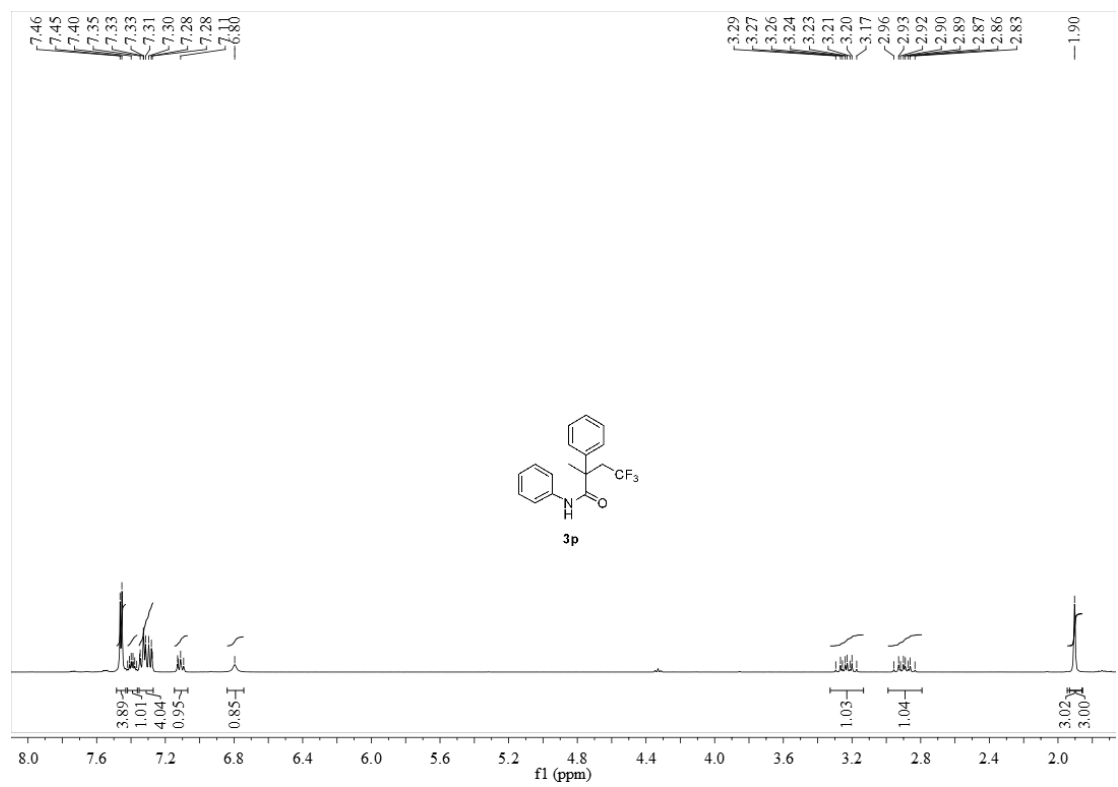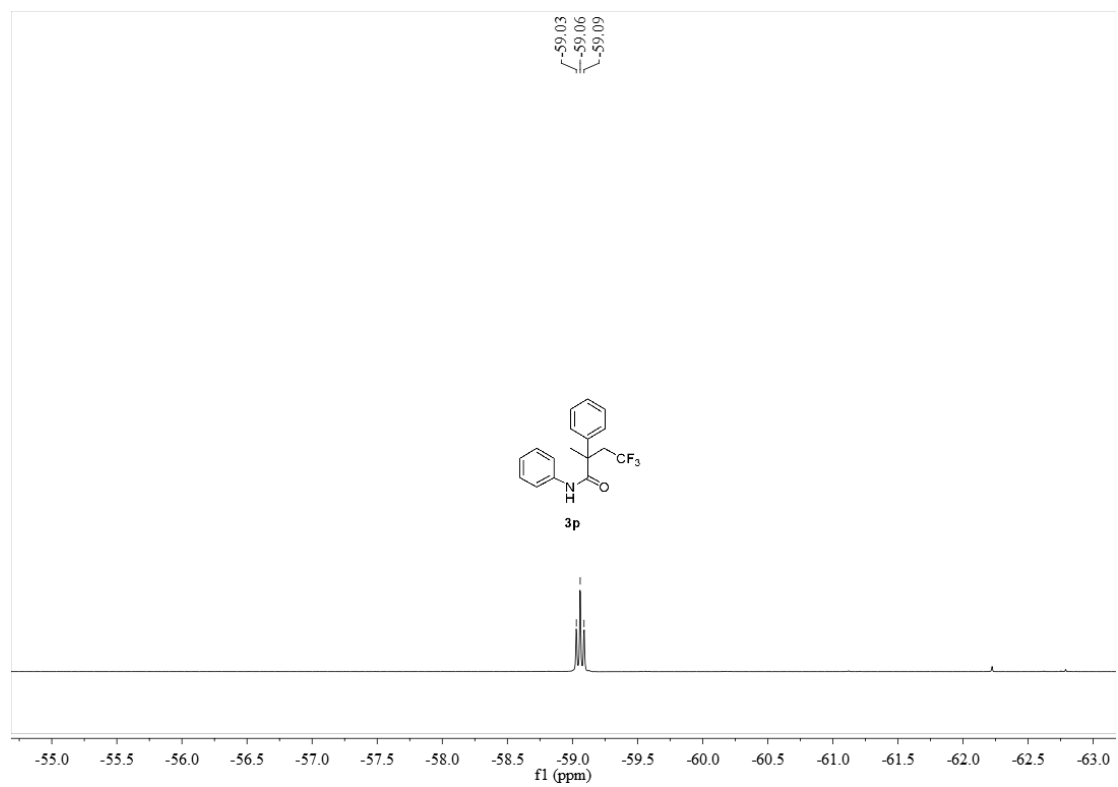

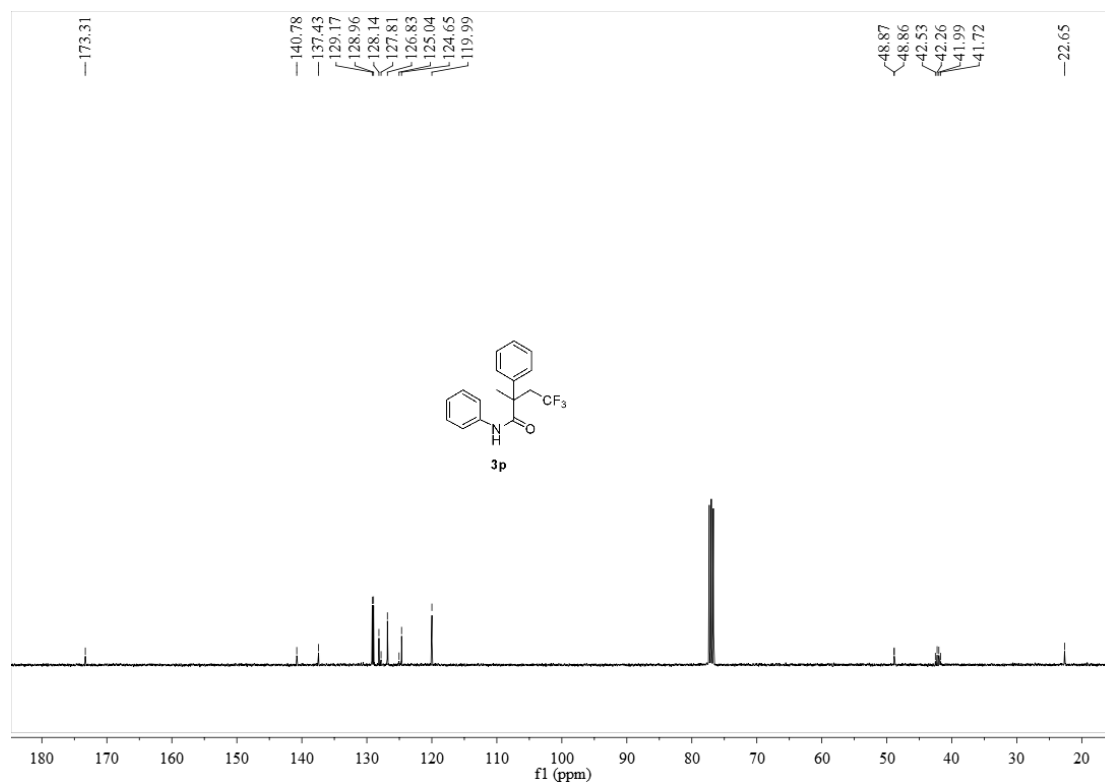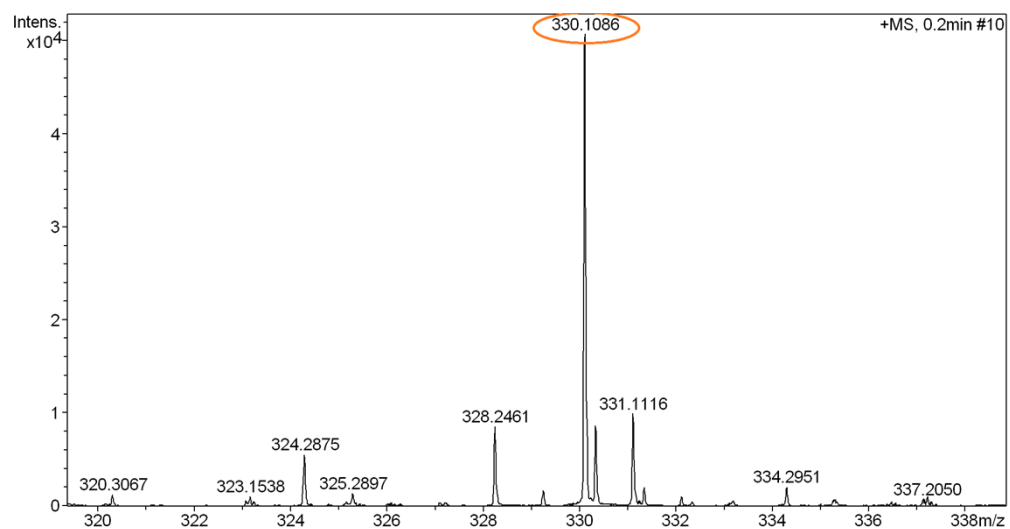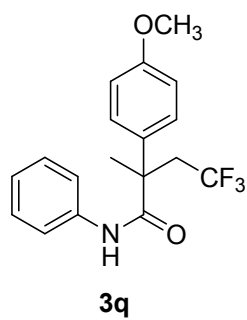

**4,4,4-trifluoro-2-(4-methoxyphenyl)-2-methyl-N-phenylbutanamide (3q)**

**M:** 27.6 mg, **Yield:** 41%; **<sup>1</sup>H-NMR** (400 MHz, CDCl<sub>3</sub>) [ppm]  $\delta$  7.38–7.28 (m, 6H), 7.13–7.08 (m,

1H), 7.00–6.94 (m, 2H), 6.84 (s, 1H), 3.86 (s, 3H), 3.20 (dq,  $J = 15.6, 11.0$  Hz, 1H), 2.85 (dq,  $J = 15.6, 11.3$  Hz, 1H), 1.87 (s, 3H);  **$^{19}\text{F}$ -NMR** (376 MHz,  $\text{CDCl}_3$ ) [ppm]  $\delta$  -59.08 (t,  $J = 11.1$  Hz, 3F);  **$^{13}\text{C}$ -NMR** (100 MHz,  $\text{CDCl}_3$ ) [ppm]  $\delta$  173.7, 159.3, 137.5, 132.4, 129.0, 128.1, 126.5 (q,  $J = 276.0$  Hz), 124.6, 119.9, 114.5, 55.3, 48.3, 42.0 (q,  $J = 26.5$  Hz), 22.9; **IR** (KBr)  $\nu$  ( $\text{cm}^{-1}$ ): 3316, 2929, 2855, 2360, 1723, 1678, 1604, 1516, 1443, 1366, 1292, 1258, 1125, 1077, 1036, 951, 833, 752, 695, 557; **HRMS** (ESI) found:  $m/z$  336.1220 [M-H] $^-$ ; calcd. for  $\text{C}_{17}\text{H}_{16}\text{F}_3\text{NO}$ -H 336.1212.

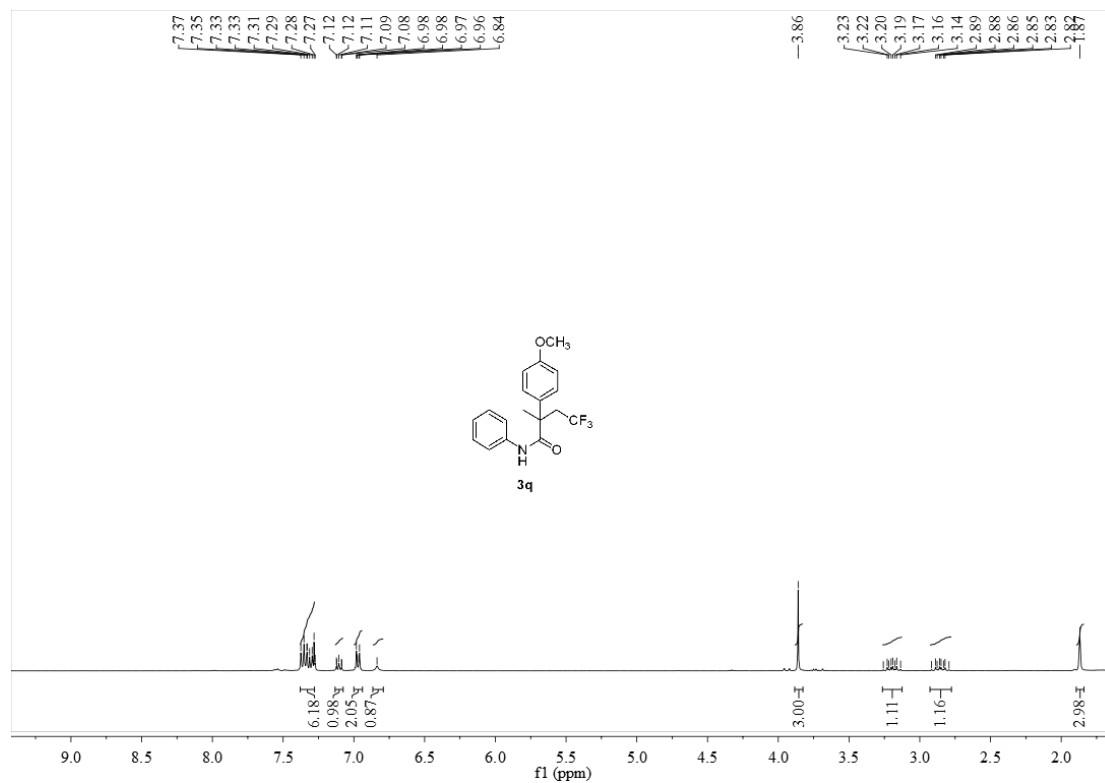

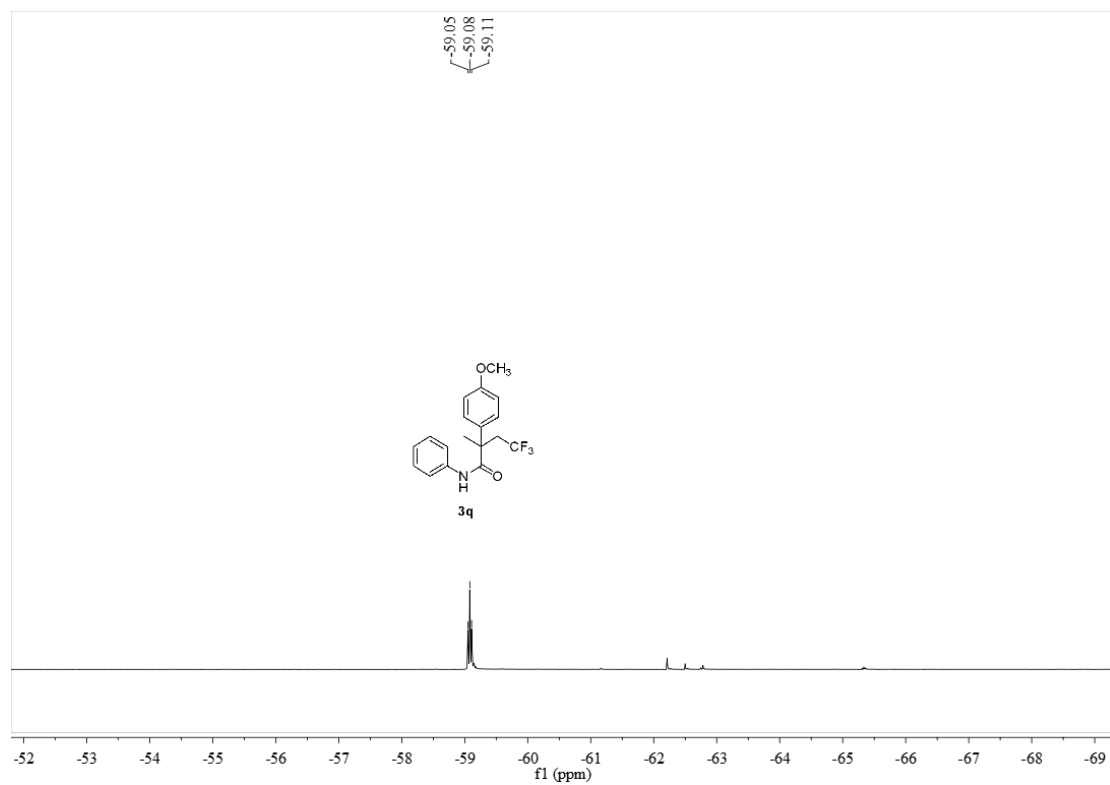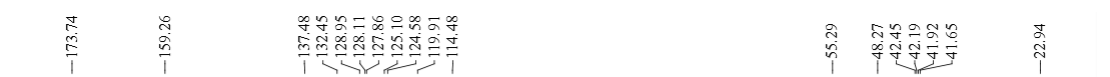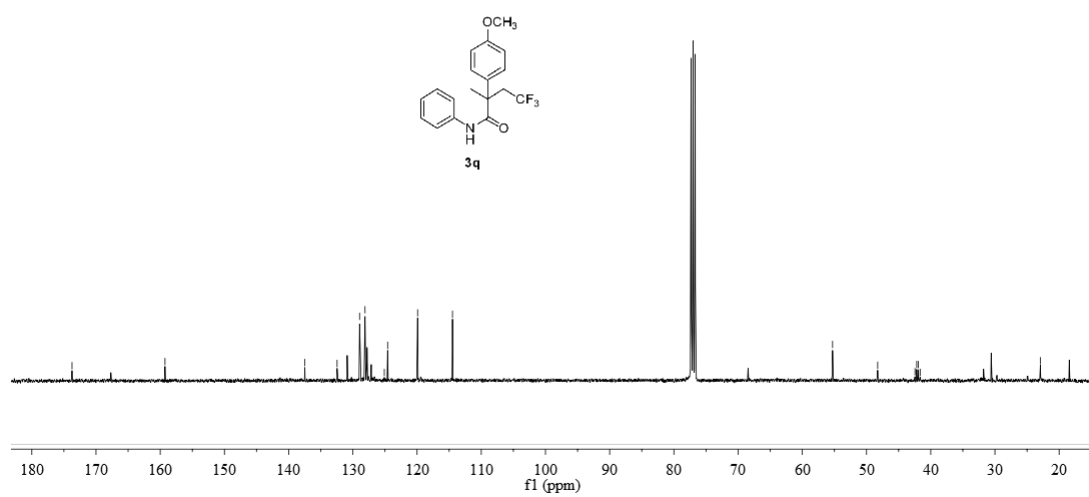



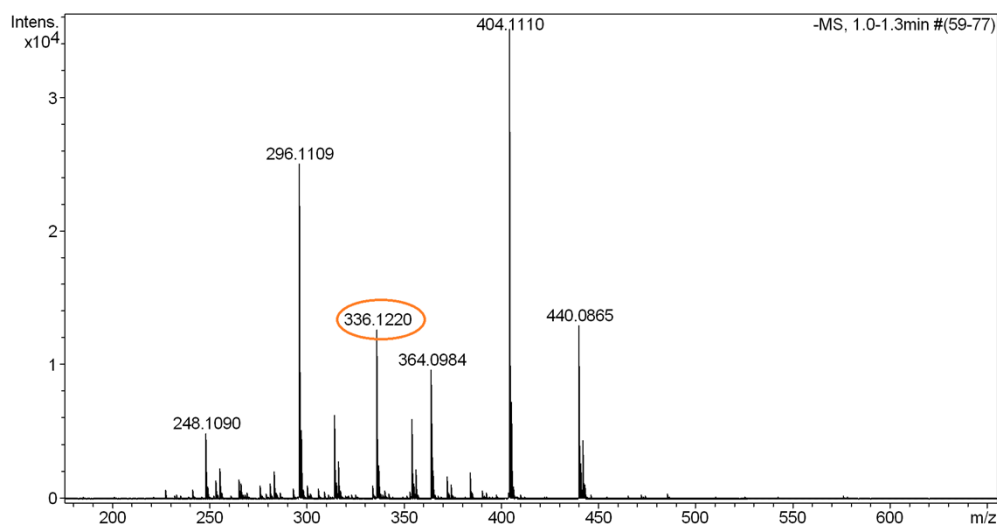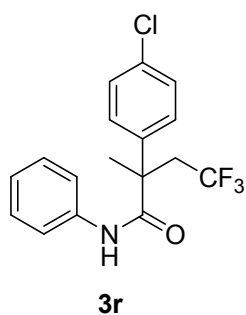

**2-(4-chlorophenyl)-4,4,4-trifluoro-2-methyl-N-phenylbutanamide (3r)**

**M:** 20.5 mg, **Yield:** 30%; **<sup>1</sup>H-NMR** (400 MHz, CDCl<sub>3</sub>) [ppm]  $\delta$  7.41 (q,  $J$  = 8.8 Hz, 4H), 7.32 (dt,  $J$  = 15.9, 8.1 Hz, 4H), 7.12 (t,  $J$  = 7.0 Hz, 1H), 6.76 (s, 1H), 3.20 (dq,  $J$  = 15.5, 10.9 Hz, 1H), 2.85 (dq,  $J$  = 15.6, 11.1 Hz, 1H), 1.88 (s, 3H); **<sup>19</sup>F-NMR** (376 MHz, CDCl<sub>3</sub>) [ppm]  $\delta$  -59.08 (t,  $J$  = 11.0 Hz, 3F); **<sup>13</sup>C-NMR** (100 MHz, CDCl<sub>3</sub>) [ppm]  $\delta$  172.7, 139.4, 137.2, 134.2, 129.3, 129.0, 128.2, 126.3 (q,  $J$  = 269.0 Hz), 124.9, 120.1, 48.4 (d,  $J$  = 1.0 Hz), 42.2 (q,  $J$  = 27.0 Hz), 22.6; **IR** (KBr)  $\nu$  (cm<sup>-1</sup>): 3319, 2919, 2850, 2360, 1673, 1596, 1525, 1440, 1364, 1309, 1259, 1122, 1038, 947, 830, 752, 692, 556; **HRMS** (ESI) found:  $m/z$  364.0700 [M+Na]<sup>+</sup>; calcd. for C<sub>17</sub>H<sub>15</sub>ClF<sub>3</sub>NO+Na 364.0692.

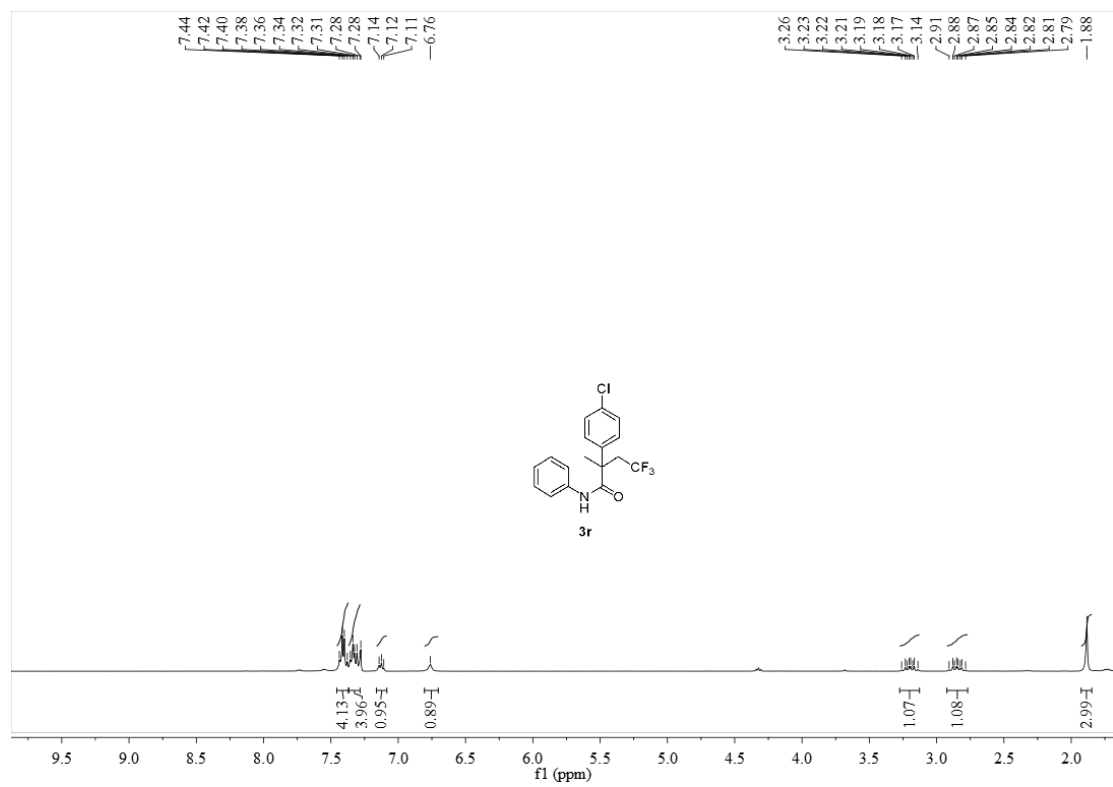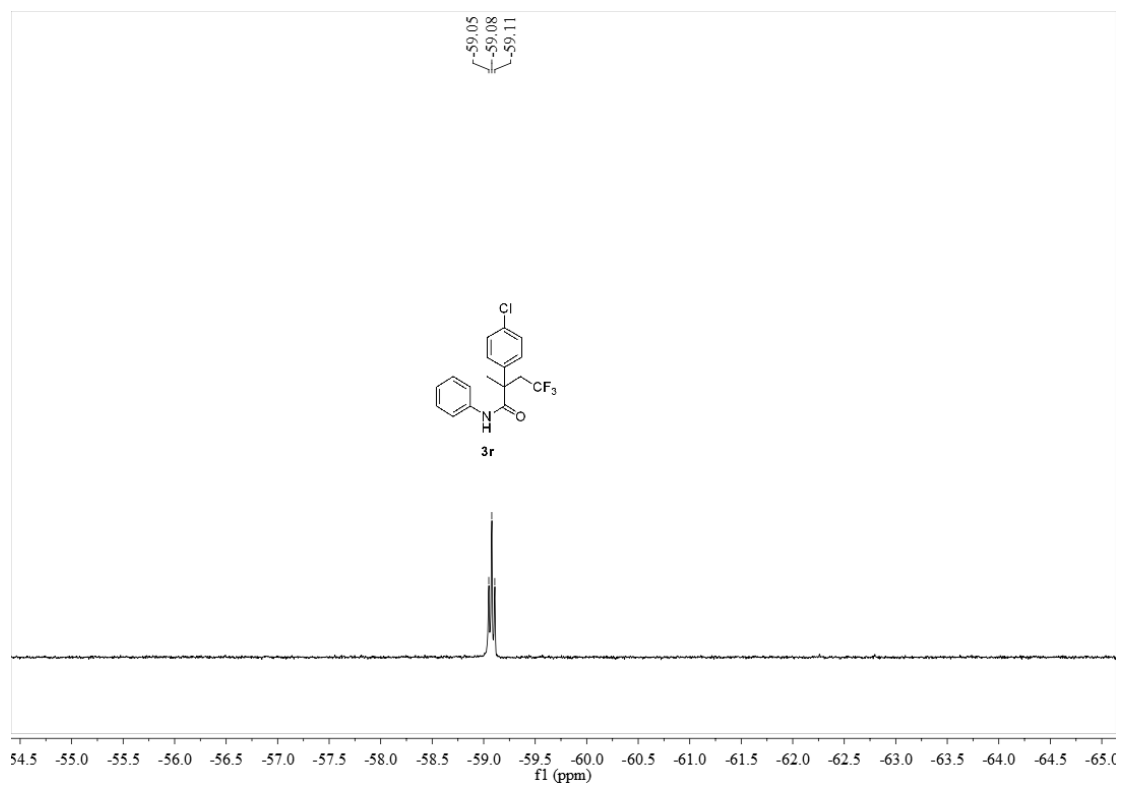

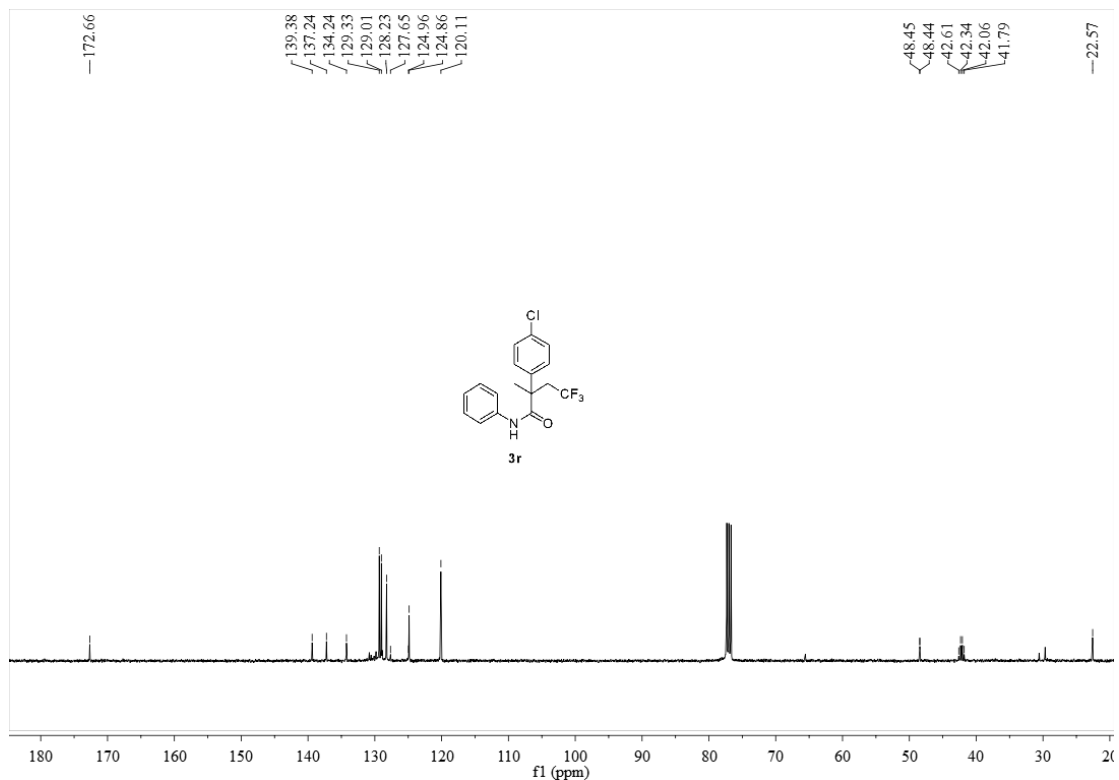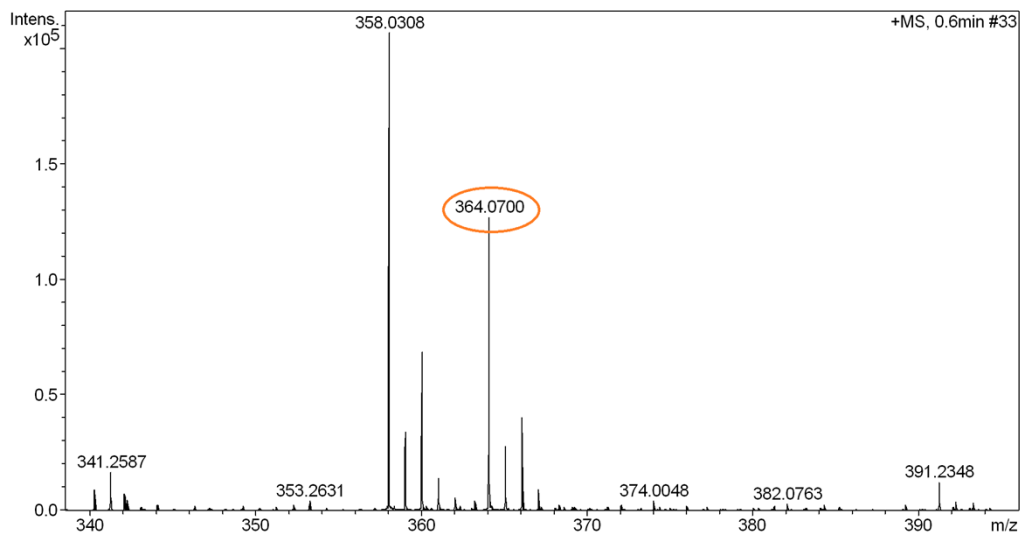

Supplement: c5ra08996d1.pdf [file c5ra08996d1.pdf]
